# Supplementary material for: Wait a minute? An observational cohort study comparing iron stores in healthy Swedish infants at 4 months of age after 10-, 60- and 180-second umbilical cord clamping
Source: PubMed Central journal article supplement — BMJ Open. 2017 Dec 29;7(12):e017215. doi: 10.1136/bmjopen-2017-017215 (PMC5778270; doi:10.1136/bmjopen-2017-017215), 2017-12-29
Supplement: bmjopen-2017-017215.draft_revisions.pdf [file bmjopen-2017-017215.draft_revisions.pdf]

# BMJ Open

BMJ Open is committed to open peer review. As part of this commitment we make the peer review history of every article we publish publicly available.

When an article is published we post the peer reviewers' comments and the authors' responses online. We also post the versions of the paper that were used during peer review. These are the versions that the peer review comments apply to.

The versions of the paper that follow are the versions that were submitted during the peer review process. They are not the versions of record or the final published versions. They should not be cited or distributed as the published version of this manuscript.

BMJ Open is an open access journal and the full, final, typeset and author-corrected version of record of the manuscript is available on our site with no access controls, subscription charges or pay-per-view fees (<http://bmjopen.bmj.com>).

If you have any questions on BMJ Open's open peer review process please email [editorial.bmjopen@bmj.com](mailto:editorial.bmjopen@bmj.com)

# BMJ Open

**Wait a minute? An observational study assessing iron stores in four months old children after 60 s umbilical cord clamping compared to <10 s and 180 s.**

|                                 |                                                                                                                                                                                                                                                                                                                                                                                                                                                                                                                                                                                                                                                                                                                                                                                                                                                                                                                                                                                                                                                                                                                                                                                                                                                                                                                                                                                                                                                                                 |
|---------------------------------|---------------------------------------------------------------------------------------------------------------------------------------------------------------------------------------------------------------------------------------------------------------------------------------------------------------------------------------------------------------------------------------------------------------------------------------------------------------------------------------------------------------------------------------------------------------------------------------------------------------------------------------------------------------------------------------------------------------------------------------------------------------------------------------------------------------------------------------------------------------------------------------------------------------------------------------------------------------------------------------------------------------------------------------------------------------------------------------------------------------------------------------------------------------------------------------------------------------------------------------------------------------------------------------------------------------------------------------------------------------------------------------------------------------------------------------------------------------------------------|
| Journal:                        | <i>BMJ Open</i>                                                                                                                                                                                                                                                                                                                                                                                                                                                                                                                                                                                                                                                                                                                                                                                                                                                                                                                                                                                                                                                                                                                                                                                                                                                                                                                                                                                                                                                                 |
| Manuscript ID                   | bmjopen-2017-017215                                                                                                                                                                                                                                                                                                                                                                                                                                                                                                                                                                                                                                                                                                                                                                                                                                                                                                                                                                                                                                                                                                                                                                                                                                                                                                                                                                                                                                                             |
| Article Type:                   | Research                                                                                                                                                                                                                                                                                                                                                                                                                                                                                                                                                                                                                                                                                                                                                                                                                                                                                                                                                                                                                                                                                                                                                                                                                                                                                                                                                                                                                                                                        |
| Date Submitted by the Author:   | 10-Apr-2017                                                                                                                                                                                                                                                                                                                                                                                                                                                                                                                                                                                                                                                                                                                                                                                                                                                                                                                                                                                                                                                                                                                                                                                                                                                                                                                                                                                                                                                                     |
| Complete List of Authors:       | <p>Askelöf, Ulrica; Dept of Clinical Science, Intervention and Technology CLINTEC, Division of Obstetrics and Gynecology; The Swedish National Umbilical Cord Blood Bank, Sahlgrenska University Hospital</p> <p>Andersson, Ola; Uppsala Universitet, Womens and Childrens health; Hallands sjukhus Halmstad, Research and Development</p> <p>Dommelof, Magnus; Umea University, Department of Clinical Sciences, Pediatrics</p> <p>Fasth, Anders; Institution of Clinical Sciences, University of Gothenburg; The Swedish National Umbilical Cord Blood Bank, Sahlgrenska University Hospital</p> <p>Hallberg, Boubou; Karolinska Hospital and Karolinska Institutet, Neonatology &amp; CLINTEC</p> <p>Hellström-Westas, Lena; Uppsala Universitet, Women's and Children's Health</p> <p>Pettersson, Karin; Department of Clinical Science, Intervention and Technology; The Swedish National Umbilical Cord Blood Bank, Sahlgrenska University Hospital</p> <p>Westgren, Magnus; Department of Clinical Science, Intervention and Technology, Karolinska Institute; The Swedish National Umbilical Cord Blood Bank, Sahlgrenska University Hospital</p> <p>Wiklund, Ingela E ; Department of Clinical Sciences, Danderyd Hospital</p> <p>Götherström, Cecilia; Department of Clinical Science, Intervention and Technology, Division of Obstetrics and Gynecology, Karolinska Institutet; The Swedish National Umbilical Cord Blood Bank, Sahlgrenska University Hospital</p> |
| <b>Primary Subject Heading</b>: | Obstetrics and gynaecology                                                                                                                                                                                                                                                                                                                                                                                                                                                                                                                                                                                                                                                                                                                                                                                                                                                                                                                                                                                                                                                                                                                                                                                                                                                                                                                                                                                                                                                      |
| Secondary Subject Heading:      | Paediatrics, Haematology (incl blood transfusion)                                                                                                                                                                                                                                                                                                                                                                                                                                                                                                                                                                                                                                                                                                                                                                                                                                                                                                                                                                                                                                                                                                                                                                                                                                                                                                                                                                                                                               |
| Keywords:                       | PAEDIATRICS, UMBILICAL CORD CLAMPING, ALTRUISTIC UMBILICAL CORD BLOOD DONATION, IRON DEFICIENCY, HAEMATOPOIETIC STEM CELL TRANSPLANTATION, Fetal medicine < OBSTETRICS                                                                                                                                                                                                                                                                                                                                                                                                                                                                                                                                                                                                                                                                                                                                                                                                                                                                                                                                                                                                                                                                                                                                                                                                                                                                                                          |

1  
2  
3  
4  
5  
6  
7  
8  
9  
10  
11  
12  
13  
14  
15  
16  
17  
18  
19  
20  
21  
22  
23  
24  
25  
26  
27  
28  
29  
30  
31  
32  
33  
34  
35  
36  
37  
38  
39  
40  
41  
42  
43  
44  
45  
46  
47  
48  
49  
50  
51  
52  
53  
54  
55  
56  
57  
58  
59  
60

For peer review only

1  
2  
3 **Wait a minute? An observational study assessing iron stores in four months old children after 60 s**  
4 **umbilical cord clamping compared to <10 s and 180 s**  
5  
6  
7

8 Ulrica Askelöf, RNM<sup>a,g</sup>, Ola Andersson, MD, PhD<sup>b</sup>, Magnus Domellöf, MD, Prof<sup>c</sup>, Anders Fasth, MD,  
9 Prof<sup>d,g</sup>, Boubou Hallberg, MD, PhD<sup>h</sup>, Lena Hellström-Westas, MD, Prof<sup>b</sup>, Karin Pettersson, MD,  
10 Associate Prof<sup>a,g</sup>, Magnus Westgren, MD, Prof<sup>a,g</sup>, Ingela Wiklund, RNM, Associate Prof<sup>e</sup>, Cecilia  
11 Götherström, Associate Prof<sup>a,f,g</sup>  
12

13  
14 **Affiliations:** <sup>a</sup>Department of Clinical Science, Intervention and Technology, Division of Obstetrics and  
15 Gynecology, Karolinska Institutet, Stockholm, Sweden; <sup>b</sup>Department of Women's and Children's  
16 Health, Uppsala University, Uppsala, Sweden; <sup>c</sup>Department of Clinical Sciences, Pediatrics, Umeå  
17 University, Umeå, Sweden; <sup>d</sup>Institution of Clinical Sciences, University of Gothenburg, Gothenburg,  
18 Sweden; <sup>e</sup>Department of Clinical Sciences, Danderyd Hospital, Stockholm, Sweden and <sup>f</sup>Center for  
19 Hematology and Regenerative Medicine, Karolinska Institutet, Stockholm, Sweden; <sup>g</sup>The Swedish  
20 National Umbilical Cord Blood Bank, Sahlgrenska University Hospital, Gothenburg, Sweden;  
21 <sup>h</sup>Department of Neonatology, CLINTEC, Karolinska Institutet and University Hospital, Stockholm,  
22 Sweden;  
23  
24

25  
26 **Corresponding author:** Associate Prof Cecilia Götherström at Cecilia.gotherstrom@ki.se  
27

28 **Funding Source:** The prospective part of the study was supported by The Swedish Childhood Cancer  
29 Foundation; The regional agreement on medical training and clinical research (ALF) at Karolinska  
30 Institutet and at Sahlgrenska University Hospital and The Dr Åke Olsson Foundation for  
31 Hematological Research, Stockholm. The RCT that provided data for the historical cohorts was  
32 supported by Regional Scientific Council of Halland; the HASNA Foundation, Halmstad; HRH Crown  
33 Princess Lovisa's Foundation for Child Care, Stockholm; and the Framework of Positive Scientific  
34 Culture, Hospital of Halland, Halmstad. The funders were not involved in the study design, data  
35 analysis, or manuscript preparation.  
36  
37

38 **Financial Disclosure:** The authors have no financial relationships relevant to this article to disclose.  
39

40 **Conflict of Interest:** The authors have no conflicts of interest relevant to this article to disclose.  
41

42 **Data Sharing Statement:** There are no other unpublished data available.  
43

44 **Clinical Trial Registration:** Clinicaltrial.gov NCT01245296.  
45

46 **Ethics Approval:** By the Regional Ethical Review Board in Stockholm (2011/2142-31/3) and the  
47 Regional Ethical Review Board at Lund University (41/2008).  
48

49 **Abbreviations:** ANOVA- analysis of variance, CI – confidence interval, CRP – C reactive protein, ID -  
50 iron deficiency, MCV - mean cell volume, NS – non significant, RCT - randomized controlled trial, s –  
51 seconds, SD – standard deviation, UC – umbilical cord, UCB – umbilical cord blood.  
52  
53  
54  
55  
56  
57  
58  
59  
60

## Abstract

**BACKGROUND AND OBJECTIVE:** Umbilical cord blood (UCB) is a valuable stem cell source used for transplantation. Immediate umbilical cord (UC) clamping is normally practiced in UCB collection but delayed UC clamping is increasingly advocated to reduce possible infant anaemia. This policy obstructs collection of UCB for banking. The objective was to evaluate an UC clamping method that enables collection of altruistically donated UCB, without adverse effects for the donating infant. We investigated the consequences of different UC clamping times with regard to infant's iron status at the age of four months.

**DESIGN:** Prospective observational study with two historical controls.

**SETTING:** A university hospital in Stockholm, Sweden and a county hospital in Halland, Sweden.

**METHOD:** Iron status was assessed at four months in 200 prospectively recruited term infants whose UC was clamped 60 seconds (s) after birth in connection with UCB donation. The results were compared to data from a previously conducted randomized controlled trial including infants subjected to UC clamping at  $\leq 10$  s (n=200) or  $\geq 180$  s (n=200) after delivery.

**RESULTS:** After adjustment for age differences at the time of follow-up, serum ferritin concentrations were 77  $\mu\text{g/L}$ , 103  $\mu\text{g/L}$  and 114  $\mu\text{g/L}$  in the 10 s, 60 s and 180 s groups, respectively. The adjusted ferritin concentration was significantly higher in the 60 s group compared to the 10 s group ( $P=0.002$ ) while the difference between the 60 s and 180 s groups was not significant ( $P=0.29$ ).

**CONCLUSION:** Delaying UC clamping for 60 s, compared to 10 s, results in higher serum ferritin concentrations at four months in term infants. This study suggests that it is possible to obtain the iron preserving benefits from delayed UC clamping also in connection with altruistic UCB donation.

### Strengths and limitations of the study

- This study compares iron- and blood status at the age of four months in children whose UC were clamped after 60 s due to donation of UCB, with children whose UC were clamped  $\leq 10$  s or  $\geq 180$  s.
- In this study we focus on potential consequences for the UCB donors caused by different UC clamping times, and not the quality of the collected UCB.
- This prospective observational study uses historical controls and results must be interpreted with caution because of potential confounding bias.
- We did not use a non-inferiority approach for this study since we aimed to compare results after 60 s UC clamping with both 10 s- and 180 s UC clamping.

## INTRODUCTION

Umbilical cord blood (UCB) is a valuable stem cell source for the 30-50% of patients that need a hematopoietic stem cell transplantation, but who lack a suitable family or public registry donor.[1 2]

More than 35.000 transplantations with UCB have been performed worldwide.[1]

The number of hematopoietic stem cells in the UCB unit highly affects the outcome of transplantation.[3 4] A small cell dose in a transplanted unit is directly correlated with a delay in recovery of the immune system and lower incidence of sustained donor engraftment.[5 6] Large cell numbers are essential and closely correlated with the collected volume of UCB. Volume is dependent on the time of umbilical cord (UC) clamping.[7] The earlier the UC is clamped, the more blood is left to collect from the placenta and for this reason immediate UC clamping is normally practiced in UCB collection.

During the last decades, immediate UC clamping has been part of active management of labour with the aim to reduce maternal haemorrhage at birth.[8 9] Hence, the placenta and UCB, have been regarded as waste products following birth. However, immediate UC clamping may deprive infants of up to one third of the total fetoplacental blood volume[10 11] and increase the risk of iron deficiency (ID) in the first 3-6 months of life.[12-16] Iron deficiency is associated with impaired neurodevelopment affecting cognitive, motor, and behavioural skills in young children.[17-19] For this reason the World Health Organization recommends delayed UC clamping for 1-3 minutes after birth.[20]

We hypothesized that if the UC is clamped at 60 seconds (s) after birth, a sufficient amount of blood will have passed from the placenta to the infant to reduce the risk of ID and anaemia while still allowing collection of UCB for banking[21]. The aim of the current study was to evaluate iron status and complete blood counts at the age of four months in infants who had the UC clamped after 60s in connection with UCB donation and compare the results to immediate ( $\leq 10$ s) and late ( $\geq 180$ s) UC clamping. In this study we focused on potential consequences for the donors only.

## MATERIALS AND METHODS

We performed an observational cohort study using one prospective clinical cohort and data from a previously performed randomized controlled trial (RCT).[13] The prospectively recruited infants were born at Karolinska University Hospital Huddinge, Sweden between April 2012 and May 2015, to parents who agreed to donate UCB to the Swedish National Umbilical Cord Blood Bank. To enable collection of UCB, the UC was clamped after  $60 \pm 10$ s. The historical cohorts consisted of data from infants who were randomized to immediate (within 10s after birth) or late (after 180s) UC clamping, respectively, in a trial conducted by three of the co-authors at the Hospital of Halland in Halmstad, Sweden between April 2008 and September 2009.[13]

### Outcome measures

The primary outcome variable was ferritin as a measure of iron stores, at the age of four months and secondary outcomes included haemoglobin, transferrin saturation, soluble transferrin receptors, mean cell volume (MCV) as well as ID (defined as  $\geq 2$  iron indicators outside reference range with the following cut-off values: ferritin  $< 20 \mu\text{g/L}$ , [22] MCV  $< 73 \text{ fL}$ , [22] transferrin saturation  $< 10\%$  [23] and transferrin receptor  $> 7 \text{ mg/L}$  [13]). Since ferritin is an acute phase reactant, C reactive protein (CRP) was analysed in order to exclude falsely elevated ferritin measurements. The infant's dietary habits at four months were also considered as well as the relevance of infant sex for iron and blood status at that age.

### Sample size

Based on results from the original RCT (the historical cohorts) [13], demonstrating a 45% difference in ferritin concentration between 10s and 180s UC clamping, we decided to include an equal number of infants in the prospective cohort as in the two historical groups. Hence, 200 children in each group were included in the study without any formal power analysis.

### Study population and inclusion criteria

The same inclusion criteria applied for the prospective and historical cohorts: healthy mother, normal, singleton pregnancy, gestational age 37+0 to 41+6 weeks and planned vaginal delivery with

1  
2  
3 cephalic presentation.[13] The mother also had to understand Swedish well enough to consent  
4  
5 participation in the study. In the prospectively recruited cohort, parents also had to agree to altruistic  
6  
7 donation of UCB, and to the modified UC clamping strategy. Exclusion criteria were also the same in  
8  
9 the three groups: smoking mother, serious congenital malformations, syndromes, or other congenial  
10  
11 diseases that could affect the outcome measures. For this study, we only included data from the RCT  
12  
13 that were handled according to per protocol, as compared to the analysis by intention to treat in the  
14  
15 original RCT.[13] Moreover, like the RCT, we only included children with CRP<10 in the analysis. All  
16  
17 parents donating UCB at Karolinska University Hospital Huddinge that met the inclusion criteria were  
18  
19 offered to participate in the study upon arrival at the delivery unit. Midwives were instructed to  
20  
21 clamp the UC 60s after birth in deliveries where parents had consented to participate in the study.  
22  
23 Staff in charge of collection of UCB measured the exact timing of UC clamping using a digital timer.  
24  
25 Only children whose UC were clamped at 60 ±10s were included in the study. Oral and written  
26  
27 informed consent was obtained from one or both of the parents. The study was approved by the  
28  
29 regional ethical review board in Stockholm (2011/2142-31/3) and the RCT was approved by the  
30  
31 regional ethical review board at Lund University (41/2008).  
32  
33  
34  
35

### 36 **Data collection and blood samples**

37  
38 Midwives were instructed to hold the new-born baby below the uterine level for the first 30s before  
39  
40 placing the infant on the mother's abdomen. The UC clamping technique used in the prospectively  
41  
42 recruited cohort was similar to the historical groups except for the timing. Venous blood samples  
43  
44 were analysed at birth from the UC, at two to three days of age in connection with metabolic  
45  
46 screening and at four months (±21 days) at a scheduled follow-up visit. At birth and at four months,  
47  
48 serum ferritin, haemoglobin, haematocrit, MCV, reticulocyte count, transferrin saturation, transferrin  
49  
50 receptor and CRP were analysed and at two to three days of age we analysed haemoglobin,  
51  
52 haematocrit and bilirubin. EDTA tubes were used for blood count and serum separator tubes for iron  
53  
54 status, bilirubin and CRP (Microvette, Sarstedt AG & Co, Nümbrecht, Germany). Blood status was  
55  
56 analysed using equal methods and equipment in both the laboratory at Karolinska University Hospital  
57  
58  
59  
60



1  
2  
3 (Sysmex XE5000, Sysmex, Kobe, Japan) and at the Hospital of Halland (Sysmex XE2100, Sysmex, Kobe,  
4  
5 Japan). Analysis of iron status and CRP could be performed at the same laboratory as in the RCT[13],  
6  
7 and therefore the blood samples collected at Karolinska University Hospital were centrifuged and the  
8  
9 serum kept at -70 degrees Celsius before sent for analysis at the Clinical Chemistry Laboratory at the  
10  
11 Hospital of Halland. The samples were then thawed and analysed using a Cobas 6000 (Roche  
12  
13 Diagnostics, Basel, Switzerland), the same method as in the RCT.[13]  
14  
15

### 16 17 **Statistical analysis**

18  
19 Analyses on the two historical cohorts, 10s and 180s, were calculated only on infants receiving  
20  
21 intervention per protocol in order to obtain clearly defined groups according to time of UC clamping.  
22  
23 Baseline characteristics were compared across groups using analysis of variance (ANOVA). Means of  
24  
25 outcome measures in the three cohorts were compared using the Bonferroni method. We also  
26  
27 performed pairwise comparisons (60s vs 10s and 60s vs 180s) using Student's t-test for variables with  
28  
29 normal distribution that were statistically significant in the Bonferroni analyses. Ferritin  
30  
31 concentration was  $\log_{10}$  transformed for analysis because of skewed distribution and the results were  
32  
33 presented as geometric means. Categorical variables were compared between groups using Fisher's  
34  
35 Exact test for pairwise comparisons. Adjusted group means were compared using ANOVA and a  
36  
37 binary logistic regression model was used to adjust for sex and age in the evaluation of ID at four  
38  
39 months. A P-value less than 0.05 were considered significant. IBM SPSS for Windows, version 22 was  
40  
41 used for the analyses.  
42  
43  
44

### 45 46 **RESULTS**

47  
48 Of the 200 prospectively recruited infants, 191 were included in the analysis as compared to 166 in  
49  
50 the 10s and 168 in the 180s groups. Infants lost to follow up or excluded due to not fulfilling inclusion  
51  
52 criteria are shown in Fig 1.  
53  
54  
55  
56  
57  
58  
59  
60

### Baseline data

There were no significant differences in the 60s group as compared to the 10s and 180s groups with regard to maternal or neonatal characteristics. The 10s group had higher UC haemoglobin (163 vs 153 g/L,  $P<0.001$ ) and higher UC haematocrit (48.7 vs 47.0%,  $P=0.005$ ) than the 60s group. There were no significant differences between the 60s and the 180s groups (Table 1).

### Two to three day-follow-up

At two to three days, blood samples were obtained from 140 infants in the 10s group, 107 in the 60s group, and 141 in the 180s group (Figure 1). The prevalence of anaemia was higher in the 10s compared to the 60s and 180s groups (9 (6.4%), 2 (1.9%) and 2 (1.4%)) respectively ( $P=0.04$ ). Haemoglobin was lower in the 10s and 60s groups compared to the 180s group; 175, 180 and 189 g/L respectively ( $P=0.001$  for 60s vs 180s). Bilirubin did not differ between the groups. Anaemic children were referred for further diagnostics but none needed treatment.

### Primary outcome

In total 468 (78%) infants had follow up at four months (children excluded or lost to follow up are shown in Figure 1). In the 60s group, the infants ( $n=147$ ) were four days older than the historical groups from the RCT ( $126\pm 7$  days vs  $122\pm 6$  days,  $P<0.001$ ). The geometric mean ferritin levels were 80, 96 and 117  $\mu\text{g/L}$  respectively in the 10s, 60s and 180s groups ( $P=0.052$  for 10s vs 60s;  $P=0.02$  for 60s vs 180s) (Table 2). After adjustment for the age difference, the geometric means were 77, 103 and 114  $\mu\text{g/L}$  respectively ( $P=0.002$  for 10s vs 60s;  $P=0.29$  for 60s vs 180s) (Table 3).

### Secondary outcomes

All secondary outcome variables are shown in Table 2. Haemoglobin levels at four months were higher in the 60s group compared to 10s and 180s, but the difference did not remain in the age adjusted model (Table 3). There were no statistically significant differences in the prevalence of anaemia in the 60s group as compared to the other two groups (Table 4). After adjustment for age at the time of follow-up, there were no differences between the 10s and 60s groups in haematocrit,

1  
2  
3 MCV, reticulocyte count, transferrin receptor or transferrin saturation. The 60s group had  
4  
5 significantly lower adjusted MCV and higher adjusted transferrin receptor compared to the 180s  
6  
7 group, but there were no differences in haematocrit, reticulocyte count or transferrin saturation  
8  
9 (Table 3). The prevalence of ID was 8 (5.2%), 7 (4.8%) and 1 (0.7%) respectively in the 10s, 60s and  
10  
11 180s groups ( $P>0.99$  for 10s vs 60s and  $P=0.04$  for 60s vs 180s) (Table 4). After statistical adjustments  
12  
13 for sex and age at the time of follow-up, the prevalence of ID did not differ between the 60s group  
14  
15 and the two other groups. The proportion of infants that were exclusively breast fed at four months  
16  
17 did not differ between the groups (79 (52%), 92 (58%) and 89 (56%) respectively in the 10s, 60s and  
18  
19 180s groups. The impact of exclusive breast feeding on ferritin concentration and ID were further  
20  
21 assessed in an adjusted model but no correlation was found (data not shown).  
22  
23

#### 24 25 **Sex differences**

26  
27 Iron and blood status at four months were further assessed by analysing differences according to  
28  
29 infant sex. When data from the three cohorts were analysed together, geometric mean ferritin was  
30  
31 lower in boys than in girls and ID was more prevalent amongst boys (Fig 2A and 2B). Haemoglobin  
32  
33 concentrations did not differ significantly between boys and girls and neither did the prevalence of  
34  
35 anaemia (data not shown).  
36  
37

#### 38 39 **DISCUSSION**

40  
41 We compared infant's iron and blood status at the age of four months after three different UC  
42  
43 clamping time intervals (60s versus  $\leq 10$ s, and  $\geq 180$ s, respectively). Previous studies have compared  
44  
45 immediate and late UC clamping but the definition of "late" in these studies varies from 60s to 180s  
46  
47 or after birth of the placenta.[12 14 15] The current study evaluates an intermediate UC clamping  
48  
49 strategy that can be used in connection with altruistic donation of UCB for clinical banking. When  
50  
51 asking parents to donate their child's UCB for the potential good of others, it is essential to inform of  
52  
53 possible consequences for the child. We demonstrated that after adjustment for age difference at  
54  
55 the time of follow-up, there were no statistically significant differences in ferritin concentration  
56  
57  
58  
59  
60

1  
2  
3 between the 60s and 180s groups but the 60s group had significantly higher ferritin concentrations  
4  
5 compared to 10s. The main reason for the effect of age on ferritin during infancy is rapid growth  
6  
7 which leads to a rapidly expanding blood volume and depletion of iron stores.[16]  
8

9  
10 Results from the present study are in accordance with a Brazilian RCT that demonstrated higher  
11  
12 ferritin concentration at the age of three months in children whose UC were clamped after 60s  
13  
14 compared to immediate UC clamping.[24] However, our findings are in contrast to a study by Ceriani  
15  
16 Cernadas et al, who reported no differences in ferritin six months after birth comparing 15s and 60s  
17  
18 UC clamping. The difference in ferritin between the 60s and 180s groups were not presented.[25]  
19

20 The present study indicates that a 60s delay before UC clamping results in a mean serum ferritin at 4  
21  
22 months of age corresponding to 90% of the mean ferritin after 180s UC clamping  
23

24 In the current study, children in the 60s group had the lowest haemoglobin of all three groups at  
25  
26 birth (10s 163 g/L, 60s 153 g/L, 180s 158 g/L) but at four months, there were no longer any  
27  
28 differences between the groups in our adjusted model. The original RCT as well as a Cochrane report  
29  
30 found higher concentrations of haemoglobin after immediate than late UC clamping at birth.[13 15]  
31  
32

33 As speculated in a previous publication, this difference may not reflect true difference in  
34  
35 haemoglobin but could be a result of trans endothelial plasma leakage in the UC after UC  
36  
37 clamping.[13]  
38

39 The prevalence of ID was higher in the 10s and 60s groups compared to the 180s group. However,  
40  
41 when adjusting for sex and age at the time of follow-up, there were no longer any statistically  
42  
43 significant differences between the three groups. In accordance with previous studies on ID in  
44  
45 infancy, we found that at four months, boys had significantly lower geometric mean ferritin and  
46  
47 more often ID than girls.[26 27] It has been suggested that the differences in iron status between the  
48  
49 two sexes may be hormone-related but it is also influenced by genetic factors, which may differ in  
50  
51 populations with different ethnicity.[27]  
52  
53  
54  
55  
56  
57  
58  
59  
60

### Limitations of the study

A limitation of this study is that we have no record of the parents' ethnic or socio-economic background, and we were therefore unable to draw any conclusions on possible impact of these factors. When comparing different interventions, RCTs are regarded as the golden standard.

However, randomization into 10s UC clamping for this study was considered unethical since there is evidence that children benefit from prolonged placental transfusion for at least 60s, and the clinical routine in Sweden is to wait 180s before UC clamping in normal deliveries. We used the historical cohorts from the RCT in Halmstad, Sweden as controls in this study. The prospectively recruited cohort (60s) is from a large birth clinic in Stockholm, Sweden while the controls are from a smaller town where the participants were recruited two to five years earlier. Although the inclusion criteria were the same and pregnant mothers in Sweden follow the same well-controlled antenatal program and the baseline data showed no significant differences in maternal or infant characteristics, it is difficult to know if the study populations are homogenous. We did not use a non-inferiority approach for this study since we aimed to compare results after 60s UC clamping with 10s and 180s. We have taken measures to avoid systematic biases caused by differences in laboratory routines between the two hospitals by using the same laboratory for analysing the iron status variables as well as CRP. Collection of UCB for transplantation is a growing and life-saving practice. Tens of thousands UCB units are altruistically donated and stored for public use each year, and as a result new-borns are exposed to limited UC clamping time. The idea that UCB left in the placenta after birth is a mere waste that is thrown away if not collected is obsolete. Optimizing UC clamping time and investigating the clinical significance to minimize risks for the infant while still enabling collection of UCB for transplantation is a great, but necessary, challenge.

## CONCLUSION

This observational study indicates that in a healthy Swedish population, UC clamping after 60s reduces the risk for low iron stores at four months of life compared to UC clamping at 10s. After adjustment for age and sex, there were no statistically significant differences in ferritin concentration between 60 and 180s UC clamping. 60s UC clamping is therefore preferable to immediate UC clamping and enables collection of UCB for transplantation. Delaying UC clamping may be more important in boys than in girls to avoid ID in early childhood. Larger studies with long term follow-up is needed to establish the clinical relevance of different UC clamping strategies.

## CONTRIBUTORS

Dr Götherström conceptualized and designed the study, analyzed data, critically revised and approved the final manuscript as submitted. Mrs Askelöf conceptualized and designed the study, carried out all data collection in the prospective cohort, carried out all analyses, drafted the initial manuscript, and approved the final manuscript as submitted. Dr Andersson designed the data collection instruments, contributed to the study design and provided data for the historical cohorts. He also carried out the initial analyses, critically reviewed and revised the manuscript, and approved the final manuscript as submitted. Profs Domellöf, Fash, Hellström-Westas, Westgren, Associate Profs Pettersson and Wiklund and Dr Hallberg participated in the study design, reviewed and revised the manuscript and approved the final manuscript as submitted.

## ACKNOWLEDGEMENTS

The authors thank Harjeet Kaur Malhi, Astrid Börjesson, Malin Hjertqvist and Camilla Halzius, the staff at the delivery ward at Karolinska University Hospital Huddinge and all mothers and infants who participated in the study. This study was supported by grants from The Swedish Childhood Cancer Foundation, The regional agreement on medical training and clinical research (ALF) in Stockholm and Gothenburg and The Dr Åke Olsson Foundation for Hematological Research, Stockholm.

**TABLE 1.** Baseline characteristics of mothers and infants according to time for umbilical cord clamping

|                                            | Umbilical cord clamping time |              |                    | P       |
|--------------------------------------------|------------------------------|--------------|--------------------|---------|
|                                            | 10s<br>n=166 (HC)            | 60s<br>n=191 | 180s<br>n=168 (HC) |         |
| <b>Maternal characteristics</b>            |                              |              |                    |         |
| Age (years)                                | 31.7(4.2)                    | 30.7(4.7)    | 30.8(4.9)          | NS      |
| Parity (including study child)             | 1.81 (0.87)                  | 1.86(0.76)   | 1.76 (0.74)        | NS      |
| Weight at first antenatal visit (kg)       | 66.4(12.0)                   | 67.3(11.5)   | 67.3(12.1)         | NS      |
| Body mass index                            | 23.6(3.8)                    | 24.5(3.9)    | 23.9(3.6)          | NS      |
| Haemoglobin at first antenatal visit (g/L) | 128(9)                       | 128(10)      | 128(11)            | NS      |
| No (%) of vaginal deliveries:              |                              |              |                    |         |
| Non-instrumental                           | 157(95)                      | 184(96)      | 157(94)            | NS      |
| Vacuum extraction                          | 8(5)                         | 7(4)         | 11(7)              | NS      |
| Forceps                                    | 1(0.6)                       | 0(0)         | 0(0)               | NS      |
| <b>Infant characteristics</b>              |                              |              |                    |         |
| Gestational age (weeks)                    | 40.0(1.1)                    | 40.0(1.0)    | 40.0(1.1)          | NS      |
| No (%) of males                            | 83(50)                       | 98(51)       | 73(43)             | NS      |
| Birth weight (g)                           | 3523(483)                    | 3603(454)    | 3633(464)          | NS      |
| Birth length (cm)                          | 50.7(1.9)                    | 50.6(1.8)    | 50.9(1.9)          | NS      |
| Head circumference (cm)                    | 34.7(1.3)                    | 35.1(1.3)    | 35.0(1.4)          | NS      |
| Umbilical cord haemoglobin (g/L)           | 163(15)                      | 153(20)      | 158(18)            | <0.001* |
| Umbilical cord haematocrit (%)             | 48.7(4.3)                    | 47.0(5.5)    | 47.1(5.0)          | 0.005** |

Values are means (SD) unless stated otherwise. P<0.05 was considered significant.

NS=non-significant; HC= Historical cohort.

\*Comparison of 10s and 60s. For 180s and 60s, P=0.063.

\*\*Comparison of 10s and 60s. For 180s and 60s, P>0.99.

**TABLE 2.** Outcome measures at the age of four months in infants whose umbilical cord were clamped after 10s, 60s or 180s

|                                           | Umbilical cord clamping time |                |                    | 60s vs 10s                  |        | 60s vs 180s                 |        |
|-------------------------------------------|------------------------------|----------------|--------------------|-----------------------------|--------|-----------------------------|--------|
|                                           | 10s<br>n=153 (HC)            | 60s<br>n=147   | 180s<br>n=148 (HC) | Mean difference<br>(95% CI) | P      | Mean difference<br>(95% CI) | P      |
| Infant age (days)                         | 122 (6)                      | 126 (7)        | 122 (6)            | 5 (3 to 6)                  | <0.001 | 4 (3 to 6)                  | <0.001 |
| <b>Main outcome measures</b>              |                              |                |                    |                             |        |                             |        |
| Geometric mean (range)<br>ferritin (µg/L) | 80 (33 to 191)               | 96 (44 to 208) | 117 (58 to 232)    | 0.83 (0.69 to 1.45)*        | 0.052  | 1.21 (1.03 to 1.44)*        | 0.02   |
| Haemoglobin (g/L)                         | 113 (7)                      | 115 (8)        | 113 (8)            | 2 (0 to 4)                  | 0.047  | 2 (0 to 4)                  | 0.03   |
| <b>Blood count</b>                        |                              |                |                    |                             |        |                             |        |
| Haematocrit (%)                           | 33.0 (2.0)                   | 33.3 (2.2)     | 32.7 (2.1)         | 0.3 (-0.2 to 0.8)           | 0.19   | 1 (0 to 1)                  | 0.02   |
| Mean cell volume (fL)                     | 77.9 (3.1)                   | 77.7 (3.7)     | 79.2 (3.0)         | -0.2 (-1 to 0.6)            | 0.67   | -1.5 (-2.3 to -0.7)         | <0.001 |
| Reticulocyte count (x10 <sup>9</sup> /L)  | 37 (11)                      | 36 (11)        | 40 (11)            | -1 (-4 to 1)                | 0.39   | -4 (-6 to -1)               | 0.01   |
| <b>Iron status</b>                        |                              |                |                    |                             |        |                             |        |
| Transferrin receptor (mg/L)               | 4.00 (0.80)                  | 4.07 (0.92)    | 3.71 (0.69)        | 0.07 (-0.13 to 0.26)        | 0.51   | 0.35 (0.17 to 0.54)         | <0.001 |
| Transferrin saturation (%)                | 16 (6)                       | 16 (8)         | 18 (6)             | 1 (-1 to 2)                 | 0.40   | -2 (-3 to 0)                | 0.03   |

Values are means (SD) unless stated otherwise. HC= Historical cohort.

\*Geometric mean ratio (95% CI for geometric mean).

Successful analyses in the 60s and 180s groups: haemoglobin (n=140, 144), haematocrit, mean cell volume, reticulocyte count (n=135, 144), ferritin (n=147, 148), transferrin receptor (n=147, 148), transferrin saturation (n=145, 148).



**TABLE 3.** Outcome measures at the age of four months adjusted for infant age

|                                           | Umbilical cord clamping time |                     |                     | P<br>60s vs 10s | P<br>60s vs 180s |
|-------------------------------------------|------------------------------|---------------------|---------------------|-----------------|------------------|
|                                           | Adjusted means (95% CI)      |                     |                     |                 |                  |
|                                           | 10s<br>n=152 (HC)            | 60s<br>n=147        | 180s<br>n=148 (HC)  |                 |                  |
| <b>Main outcome measures</b>              |                              |                     |                     |                 |                  |
| Geometric mean (range)<br>ferritin (µg/L) | 77 (68 to 87)                | 103 (90 to 117)     | 114 (100 to 129)    | 0.002           | 0.29             |
| Haemoglobin (g/L)                         | 113 (112 to 115)             | 114 (113 to 116)    | 113 (112 to 114)    | 0.30            | 0.17             |
| <b>Blood count</b>                        |                              |                     |                     |                 |                  |
| Haematocrit (%)                           | 33.1 (32.7 to 33.4)          | 33.1 (32.8 to 33.5) | 32.7 (32.4 to 33.1) | 0.30            | 0.12             |
| Mean cell volume (fL)                     | 77.8 (77.3 to 78.3)          | 77.9 (77.3 to 78.4) | 79.1 (78.6 to 79.6) | 0.30            | 0.003            |
| Reticulocyte count (x10 <sup>9</sup> /L)  | 36.9 (35.2 to 38.7)          | 37.0 (35.0 to 38.9) | 39.4 (37.6 to 41.2) | 0.99            | 0.07             |
| <b>Iron status</b>                        |                              |                     |                     |                 |                  |
| Transferrin receptor (mg/L)               | 4.01 (3.87 to 4.14)          | 4.05 (3.92 to 4.19) | 3.72 (3.59 to 3.85) | 0.62            | 0.001            |
| Transferrin saturation (%)                | 15.7 (14.7 to 16.7)          | 16.6 (15.5 to 17.7) | 18.1 (17 to 19.2)   | 0.25            | 0.06             |

Values are means (95% CI) adjusted for infant age (days from birth) unless stated otherwise.

HC= Historical cohort. Successful analyses for the 60s group were: ferritin (n=147), haemoglobin (n=140), haematocrit, mean cell volume, reticulocyte count (n=135), transferrin receptor, and transferrin saturation (n=145). For the 180s group; blood status (n=144).

**TABLE 4.** Infants with iron status indicators outside reference limits at the age of 4 months according to umbilical cord clamping time

|                              | Umbilical cord clamping time |              |                    | P<br>60s vs 10s | P<br>60s vs 180s |
|------------------------------|------------------------------|--------------|--------------------|-----------------|------------------|
|                              | 10s<br>n=153 (HC)            | 60s<br>n=147 | 180s<br>n=148 (HC) |                 |                  |
| Ferritin <20 µg/L            | 11 (7.2)                     | 4 (2.7)      | 0 (0)              | 0.11            | 0.06             |
| Anaemia (Hb<105 g/L)         | 20 (13.1)                    | 16 (11.4)    | 20 (13.9)          | 0.72            | 0.60             |
| Mean cell volume <73 fL      | 8 (5.2)                      | 14 (10.4)    | 3 (2.1)            | 0.12            | 0.01             |
| Transferrin saturation <10%  | 22 (14.4)                    | 15 (10.3)    | 8 (5.4)            | 0.38            | 0.13             |
| Transferrin receptor >7 mg/L | 0 (0)                        | 2 (1.4)      | 0 (0)              | 0.24            | 0.25             |
| Iron deficiency*             | 8 (5.2)                      | 7 (4.8)      | 1 (0.7)            | 1.00            | 0.04             |

Values are unadjusted numbers (%). HC= Historical cohort.

Numbers of successful analyses: mean cell volume (n=153, 135, 144), transferrin saturation (n=153, 145, 148), anaemia (n=153, 140, 144).

## REFERENCES

1. Bone Marrow Donors Worldwide. Published 2015. Secondary Bone Marrow Donors Worldwide. Published 2015. 2015. <http://www.bmdw.org/>.
2. Brunstein C, Setubal D, J W. Expanding the role of umbilical cord blood transplantation. *Br J Haematol* 2007;**137**(1):20-35 doi: 10.1111/j.1365-2141.2007.06521.x[published Online First: Epub Date]].
3. Copelan EA. Hematopoietic stem-cell transplantation. *The New England journal of medicine* 2006;**354**(17):1813-26 doi: 10.1056/NEJMra052638[published Online First: Epub Date]].
4. Migliaccio AR, Adamson JW, Stevens CE, et al. Cell dose and speed of engraftment in placental/umbilical cord blood transplantation: graft progenitor cell content is a better predictor than nucleated cell quantity. *Blood* 2000;**96**(8):2717-22
5. Barker JN, Byam CE, Kernan NA, et al. Availability of cord blood extends allogeneic hematopoietic stem cell transplant access to racial and ethnic minorities. *Biol Blood Marrow Transplant* 2010;**16**(11):1541-8 doi: 10.1016/j.bbmt.2010.08.011[published Online First: Epub Date]].
6. Gluckman E, Koegler G, Rocha V. Human leukocyte antigen matching in cord blood transplantation. *Semin Hematol* 2005;**42**(2):85-90 doi: 10.1053/j.seminhematol.2005.01.006[published Online First: Epub Date]].
7. Allan DS, Scrivens N, Lawless T, et al. Delayed clamping of the umbilical cord after delivery and implications for public cord blood banking. *Transfusion* 2016;**56**(3):662-5 doi: 10.1111/trf.13424[published Online First: Epub Date]].
8. Spencer PM. Controlled cord traction in management of the third stage of labour. *BMJ (Clinical research ed)* 1962;**1**:1728-32
9. Winter C, Macfarlane A, Deneux-Tharaux C, et al. Variations in policies for management of the third stage of labour and the immediate management of postpartum haemorrhage in Europe. *BJOG : an international journal of obstetrics and gynaecology* 2007;**114**(7):845-54 doi: 10.1111/j.1471-0528.2007.01377.x[published Online First: Epub Date]].
10. Yao AC, Moinian M, Lind J. Distribution of blood between infant and placenta after birth. *Lancet* 1969;**2**(7626):871-3
11. Mercer JS, Erickson-Owens DA. Rethinking placental transfusion and cord clamping issues. *J Perinat Neonatal Nurs* 2012;**26**(3):202-17; quiz 18-9 doi: 10.1097/JPN.0b013e31825d2d9a[published Online First: Epub Date]].
12. Hutton EK, Hassan ES. Late vs early clamping of the umbilical cord in full-term neonates: systematic review and meta-analysis of controlled trials. *JAMA : the journal of the American Medical Association* 2007;**297**(11):1241-52 doi: 10.1001/jama.297.11.1241[published Online First: Epub Date]].
13. Andersson O, Hellström-Westas L, Andersson D, et al. Effect of delayed versus early umbilical cord clamping on neonatal outcomes and iron status at 4 months: a randomised controlled trial. *BMJ (Clinical research ed)* 2011;**343**:d7157 doi: 10.1136/bmj.d7157[published Online First: Epub Date]].
14. Chaparro CM, Neufeld LM, Tena Alavez G, et al. Effect of timing of umbilical cord clamping on iron status in Mexican infants: a randomised controlled trial. *Lancet* 2006;**367**(9527):1997-2004 doi: 10.1016/s0140-6736(06)68889-2[published Online First: Epub Date]].
15. McDonald S, Middleton P, Dowswell T, et al. Effect of timing of umbilical cord clamping of term infants on maternal and neonatal outcomes. *Evid Based Child Health* 2014;**9**(2):303-97 doi: 10.1002/ebch.1971[published Online First: Epub Date]].
16. Oski F. Iron deficiency in infancy and childhood. *The New England journal of medicine* 1993;**329**(3)
17. Lozoff B, Beard J, Connor J, et al. Long-lasting neural and behavioral effects of iron deficiency in infancy. *Nutrition reviews* 2006;**64**(5 Pt 2):S34-43; discussion S72-91
18. Andersson O, Lindquist B, Lindgren M, et al. Effect of Delayed Cord Clamping on Neurodevelopment at 4 Years of Age: A Randomized Clinical Trial. *JAMA pediatrics*

- 2015;**169**(7):631-8 doi: 10.1001/jamapediatrics.2015.0358[published Online First: Epub Date]].
19. Berglund S, Westrup B, Hägglöf B, et al. Effects of iron supplementation of LBW infants on cognition and behavior at 3 years. *Pediatrics* 2013;**131**(1):47-55 doi: 10.1542/peds.2012-0989[published Online First: Epub Date]].
20. World Health Organization. Delayed clamping of the umbilical cord to reduce infant anaemia., 2014.
21. Frandberg S WB, Konar J, Rydberg L, Fasth A, Holgersson J. High quality cord blood banking is feasible with delayed clamping practices. The eight-year experience and current status of the national Swedish Cord Blood Bank. *Cell and tissue banking* 2016 doi: 10.1007/s10561-016-9565-6[published Online First: Epub Date]].
22. Domellöf M, Dewey K, Lönnerdal B, et al. The diagnostic criteria for iron deficiency in infants should be re-evaluated. *The Journal of nutrition* 2002;**132**(12)
23. Saarinen U, Siimes M. Developmental changes in serum iron, total iron-binding capacity, and transferrin saturation in infancy. *The Journal of Pediatrics* 1977;**91**(6):875-77
24. Venâncio SI, Levy RB, Saldiva SR, et al. [Effects of delayed cord clamping on hemoglobin and ferritin levels in infants at three months of age]. *Cad Saude Publica* 2008;**24**(2):323-31
25. Ceriani Cernadas JM, Carroli G, Pellegrini L, et al. [The effect of early and delayed umbilical cord clamping on ferritin levels in term infants at six months of life: a randomized, controlled trial]. *Arch Argent Pediatr* 2010;**108**(3):201-8 doi: 10.1590/s0325-00752010000300005[published Online First: Epub Date]].
26. Georgieff MK. Long-term brain and behavioral consequences of early iron deficiency. *Nutr Rev* 2011;**69 Suppl 1**:S43-8 doi: 10.1111/j.1753-4887.2011.00432.x[published Online First: Epub Date]].
27. Domellöf M, Lönnerdal B, Dewey K, et al. Sex differences in iron status during infancy. *Pediatrics* 2002;**110**(3):545-52

1  
2  
3  
4  
5  
6  
7  
8  
9  
10  
11  
12  
13  
14  
15  
16  
17  
18  
19  
20  
21  
22  
23  
24  
25  
26  
27  
28  
29  
30  
31  
32  
33  
34  
35  
36  
37  
38  
39  
40  
41  
42  
43  
44  
45  
46  
47  
48  
49  
50  
51  
52  
53  
54  
55  
56  
57  
58  
59  
60

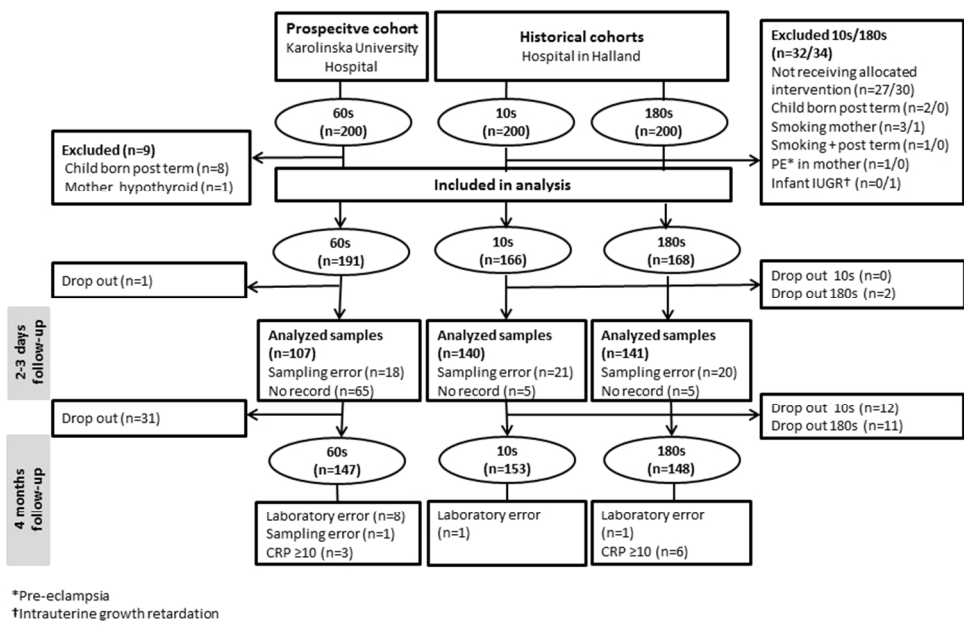

FIGURE 1. Flow chart of the study populations.

254x190mm (96 x 96 DPI)

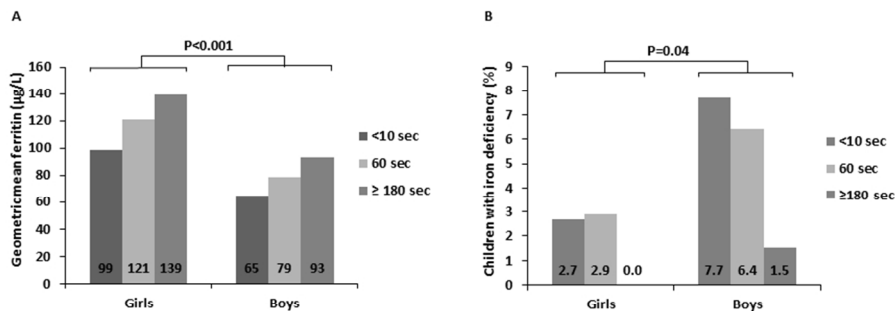

FIGURE 2. Differences in infants' iron status at the age of 4 months according to sex in three groups divided according to umbilical cord clamping time. A: Geometric mean ferritin according to sex and time for umbilical cord clamping, B: Proportion of children with iron deficiency according to time for umbilical cord clamping and sex.

254x190mm (96 x 96 DPI)

STROBE 2007 (v4) Statement—Checklist of items that should be included in reports of *cohort studies*

| Section/Topic                | Item # | Recommendation                                                                                                                                                                       | Reported on page # |
|------------------------------|--------|--------------------------------------------------------------------------------------------------------------------------------------------------------------------------------------|--------------------|
| Title and abstract           | 1      | (a) Indicate the study's design with a commonly used term in the title or the abstract                                                                                               | 1                  |
|                              |        | (b) Provide in the abstract an informative and balanced summary of what was done and what was found                                                                                  | 2                  |
| <b>Introduction</b>          |        |                                                                                                                                                                                      |                    |
| Background/rationale         | 2      | Explain the scientific background and rationale for the investigation being reported                                                                                                 | 3                  |
| Objectives                   | 3      | State specific objectives, including any prespecified hypotheses                                                                                                                     | 3                  |
| <b>Methods</b>               |        |                                                                                                                                                                                      |                    |
| Study design                 | 4      | Present key elements of study design early in the paper                                                                                                                              | 4                  |
| Setting                      | 5      | Describe the setting, locations, and relevant dates, including periods of recruitment, exposure, follow-up, and data collection                                                      | 4                  |
| Participants                 | 6      | (a) Give the eligibility criteria, and the sources and methods of selection of participants. Describe methods of follow-up                                                           | 4                  |
|                              |        | (b) For matched studies, give matching criteria and number of exposed and unexposed                                                                                                  |                    |
| Variables                    | 7      | Clearly define all outcomes, exposures, predictors, potential confounders, and effect modifiers. Give diagnostic criteria, if applicable                                             | 4                  |
| Data sources/<br>measurement | 8*     | For each variable of interest, give sources of data and details of methods of assessment (measurement). Describe comparability of assessment methods if there is more than one group |                    |
| Bias                         | 9      | Describe any efforts to address potential sources of bias                                                                                                                            | 6, 10              |
| Study size                   | 10     | Explain how the study size was arrived at                                                                                                                                            | 4                  |
| Quantitative variables       | 11     | Explain how quantitative variables were handled in the analyses. If applicable, describe which groupings were chosen and why                                                         |                    |
| Statistical methods          | 12     | (a) Describe all statistical methods, including those used to control for confounding                                                                                                | 6                  |
|                              |        | (b) Describe any methods used to examine subgroups and interactions                                                                                                                  |                    |
|                              |        | (c) Explain how missing data were addressed                                                                                                                                          |                    |
|                              |        | (d) If applicable, explain how loss to follow-up was addressed                                                                                                                       |                    |
|                              |        | (e) Describe any sensitivity analyses                                                                                                                                                |                    |
| <b>Results</b>               |        |                                                                                                                                                                                      |                    |

|                          |     |                                                                                                                                                                                                              |            |
|--------------------------|-----|--------------------------------------------------------------------------------------------------------------------------------------------------------------------------------------------------------------|------------|
| Participants             | 13* | (a) Report numbers of individuals at each stage of study—eg numbers potentially eligible, examined for eligibility, confirmed eligible, included in the study, completing follow-up, and analysed            | Fig 1      |
|                          |     | (b) Give reasons for non-participation at each stage                                                                                                                                                         | Fig 1      |
|                          |     | (c) Consider use of a flow diagram                                                                                                                                                                           | Fig 1      |
| Descriptive data         | 14* | (a) Give characteristics of study participants (eg demographic, clinical, social) and information on exposures and potential confounders                                                                     |            |
|                          |     | (b) Indicate number of participants with missing data for each variable of interest                                                                                                                          | Tables 1-4 |
|                          |     | (c) Summarise follow-up time (eg, average and total amount)                                                                                                                                                  | 7          |
| Outcome data             | 15* | Report numbers of outcome events or summary measures over time                                                                                                                                               |            |
| Main results             | 16  | (a) Give unadjusted estimates and, if applicable, confounder-adjusted estimates and their precision (eg, 95% confidence interval). Make clear which confounders were adjusted for and why they were included | 7          |
|                          |     | (b) Report category boundaries when continuous variables were categorized                                                                                                                                    |            |
|                          |     | (c) If relevant, consider translating estimates of relative risk into absolute risk for a meaningful time period                                                                                             |            |
| Other analyses           | 17  | Report other analyses done—eg analyses of subgroups and interactions, and sensitivity analyses                                                                                                               | Fig 2      |
| <b>Discussion</b>        |     |                                                                                                                                                                                                              |            |
| Key results              | 18  | Summarise key results with reference to study objectives                                                                                                                                                     | 9          |
| <b>Limitations</b>       |     |                                                                                                                                                                                                              |            |
| Interpretation           | 20  | Give a cautious overall interpretation of results considering objectives, limitations, multiplicity of analyses, results from similar studies, and other relevant evidence                                   | 9, 11      |
| Generalisability         | 21  | Discuss the generalisability (external validity) of the study results                                                                                                                                        |            |
| <b>Other information</b> |     |                                                                                                                                                                                                              |            |
| Funding                  | 22  | Give the source of funding and the role of the funders for the present study and, if applicable, for the original study on which the present article is based                                                | 1          |

\*Give information separately for cases and controls in case-control studies and, if applicable, for exposed and unexposed groups in cohort and cross-sectional studies.

**Note:** An Explanation and Elaboration article discusses each checklist item and gives methodological background and published examples of transparent reporting. The STROBE checklist is best used in conjunction with this article (freely available on the Web sites of PLoS Medicine at <http://www.plosmedicine.org/>, Annals of Internal Medicine at <http://www.annals.org/>, and Epidemiology at <http://www.epidem.com/>). Information on the STROBE Initiative is available at [www.strobe-statement.org](http://www.strobe-statement.org).



# BMJ Open

## Wait a minute? Effect of umbilical cord clamping time on iron stores in four months old children: An observational cohort study of healthy Swedish infants

|                                 |                                                                                                                                                                                                                                                                                                                                                                                                                                                                                                                                                                                                                                                                                                                                                                                                                                                                                                                                                                                                                                                                                                                                                                                                                                                                                                                                                                                                                                                                                                                                                               |
|---------------------------------|---------------------------------------------------------------------------------------------------------------------------------------------------------------------------------------------------------------------------------------------------------------------------------------------------------------------------------------------------------------------------------------------------------------------------------------------------------------------------------------------------------------------------------------------------------------------------------------------------------------------------------------------------------------------------------------------------------------------------------------------------------------------------------------------------------------------------------------------------------------------------------------------------------------------------------------------------------------------------------------------------------------------------------------------------------------------------------------------------------------------------------------------------------------------------------------------------------------------------------------------------------------------------------------------------------------------------------------------------------------------------------------------------------------------------------------------------------------------------------------------------------------------------------------------------------------|
| Journal:                        | <i>BMJ Open</i>                                                                                                                                                                                                                                                                                                                                                                                                                                                                                                                                                                                                                                                                                                                                                                                                                                                                                                                                                                                                                                                                                                                                                                                                                                                                                                                                                                                                                                                                                                                                               |
| Manuscript ID                   | bmjopen-2017-017215.R1                                                                                                                                                                                                                                                                                                                                                                                                                                                                                                                                                                                                                                                                                                                                                                                                                                                                                                                                                                                                                                                                                                                                                                                                                                                                                                                                                                                                                                                                                                                                        |
| Article Type:                   | Research                                                                                                                                                                                                                                                                                                                                                                                                                                                                                                                                                                                                                                                                                                                                                                                                                                                                                                                                                                                                                                                                                                                                                                                                                                                                                                                                                                                                                                                                                                                                                      |
| Date Submitted by the Author:   | 25-May-2017                                                                                                                                                                                                                                                                                                                                                                                                                                                                                                                                                                                                                                                                                                                                                                                                                                                                                                                                                                                                                                                                                                                                                                                                                                                                                                                                                                                                                                                                                                                                                   |
| Complete List of Authors:       | <p>Askelöf, Ulrica; Dept of Clinical Science, Intervention and Technology , Division of Obstetrics and Gynecology, Karolinska Institutet; The Swedish National Umbilical Cord Blood Bank, Sahlgrenska University Hospital</p> <p>Andersson, Ola; Uppsala Universitet, Womens and Childrens health; Hallands sjukhus Halmstad, Research and Development</p> <p>Domellöf, Magnus; Umea University, Department of Clinical Sciences, Pediatrics</p> <p>Fasth, Anders; Institution of Clinical Sciences, University of Gothenburg; The Swedish National Umbilical Cord Blood Bank, Sahlgrenska University Hospital</p> <p>Hallberg, Boubou; Karolinska Hospital and Karolinska Institutet, Neonatology &amp; CLINTEC</p> <p>Hellström-Westas, Lena; Uppsala Universitet, Women's and Children's Health</p> <p>Pettersson, Karin; Department of Clinical Science, Intervention and Technology, Division of Obstetrics and Gynecology, Karolinska Institutet; The Swedish National Umbilical Cord Blood Bank, Sahlgrenska University Hospital</p> <p>Westgren, Magnus; Department of Clinical Science, Intervention and Technology, Karolinska Institute; The Swedish National Umbilical Cord Blood Bank, Sahlgrenska University Hospital</p> <p>Wiklund, Ingela E ; Department of Clinical Sciences, Danderyd Hospital</p> <p>Götherström, Cecilia; Department of Clinical Science, Intervention and Technology, Division of Obstetrics and Gynecology, Karolinska Institutet; The Swedish National Umbilical Cord Blood Bank, Sahlgrenska University Hospital</p> |
| <b>Primary Subject Heading</b>: | Obstetrics and gynaecology                                                                                                                                                                                                                                                                                                                                                                                                                                                                                                                                                                                                                                                                                                                                                                                                                                                                                                                                                                                                                                                                                                                                                                                                                                                                                                                                                                                                                                                                                                                                    |
| Secondary Subject Heading:      | Paediatrics, Haematology (incl blood transfusion)                                                                                                                                                                                                                                                                                                                                                                                                                                                                                                                                                                                                                                                                                                                                                                                                                                                                                                                                                                                                                                                                                                                                                                                                                                                                                                                                                                                                                                                                                                             |
| Keywords:                       | PAEDIATRICS, UMBILICAL CORD CLAMPING, ALTRUISTIC UMBILICAL CORD BLOOD DONATION, IRON DEFICIENCY, HAEMATOPOIETIC STEM CELL TRANSPLANTATION, Fetal medicine < OBSTETRICS                                                                                                                                                                                                                                                                                                                                                                                                                                                                                                                                                                                                                                                                                                                                                                                                                                                                                                                                                                                                                                                                                                                                                                                                                                                                                                                                                                                        |
|                                 |                                                                                                                                                                                                                                                                                                                                                                                                                                                                                                                                                                                                                                                                                                                                                                                                                                                                                                                                                                                                                                                                                                                                                                                                                                                                                                                                                                                                                                                                                                                                                               |

1  
2  
3  
4  
5  
6  
7  
8  
9  
10  
11  
12  
13  
14  
15  
16  
17  
18  
19  
20  
21  
22  
23  
24  
25  
26  
27  
28  
29  
30  
31  
32  
33  
34  
35  
36  
37  
38  
39  
40  
41  
42  
43  
44  
45  
46  
47  
48  
49  
50  
51  
52  
53  
54  
55  
56  
57  
58  
59  
60

SCHOLARONE™  
Manuscripts

For peer review only

1  
2  
3 **Wait a minute? Effect of umbilical cord clamping time on iron stores in four months old children:**  
4 **An observational cohort study of healthy Swedish infants**  
5  
6  
7

8 Ulrica Askelöf, RNM<sup>a,g</sup>, Ola Andersson, MD, PhD<sup>b</sup>, Magnus Domellöf, MD, Prof<sup>c</sup>, Anders Fasth, MD,  
9 Prof<sup>d,g</sup>, Boubou Hallberg, MD, PhD<sup>h</sup>, Lena Hellström-Westas, MD, Prof<sup>b</sup>, Karin Pettersson, MD,  
10 Associate Prof<sup>a,g</sup>, Magnus Westgren, MD, Prof<sup>a,g</sup>, Ingela Wiklund, RNM, Associate Prof<sup>e</sup>, Cecilia  
11 Götherström, Associate Prof<sup>a,f,g</sup>  
12  
13

14 **Affiliations:** <sup>a</sup>Department of Clinical Science, Intervention and Technology, Division of Obstetrics and  
15 Gynecology, Karolinska Institutet, Stockholm, Sweden; <sup>b</sup>Department of Women's and Children's  
16 Health, Uppsala University, Uppsala, Sweden; <sup>c</sup>Department of Clinical Sciences, Pediatrics, Umeå  
17 University, Umeå, Sweden; <sup>d</sup>Institution of Clinical Sciences, University of Gothenburg, Gothenburg,  
18 Sweden; <sup>e</sup>Department of Clinical Sciences, Danderyd Hospital, Stockholm, Sweden and <sup>f</sup>Center for  
19 Hematology and Regenerative Medicine, Karolinska Institutet, Stockholm, Sweden; <sup>g</sup>The Swedish  
20 National Umbilical Cord Blood Bank, Sahlgrenska University Hospital, Gothenburg, Sweden;  
21 <sup>h</sup>Department of Neonatology, CLINTEC, Karolinska Institutet and University Hospital, Stockholm,  
22 Sweden;  
23  
24  
25

26 **Corresponding author:** Associate Prof Cecilia Götherström at Cecilia.gotherstrom@ki.se  
27

28 **Funding Source:** The prospective part of the study was supported by The Swedish Childhood Cancer  
29 Foundation; The regional agreement on medical training and clinical research (ALF) at Karolinska  
30 Institutet and at Sahlgrenska University Hospital and The Dr Åke Olsson Foundation for  
31 Hematological Research, Stockholm. The RCT that provided data for the historical cohorts was  
32 supported by Regional Scientific Council of Halland; the HASNA Foundation, Halmstad; HRH Crown  
33 Princess Lovisa's Foundation for Child Care, Stockholm; and the Framework of Positive Scientific  
34 Culture, Hospital of Halland, Halmstad. The funders were not involved in the study design, data  
35 analysis, or manuscript preparation.  
36  
37  
38

39 **Financial Disclosure:** The authors have no financial relationships relevant to this article to disclose.

40 **Conflict of Interest:** The authors have no conflicts of interest relevant to this article to disclose.

41 **Data Sharing Statement:** There are no other unpublished data available.  
42

43 **Clinical Trial Registration:** Clinicaltrial.gov NCT01245296.  
44

45 **Ethics Approval:** By the Regional Ethical Review Board in Stockholm (2011/2142-31/3) and the  
46 Regional Ethical Review Board at Lund University (41/2008).  
47

48 **Abbreviations:** ANOVA- analysis of variance, CI – confidence interval, CRP – C reactive protein, ID -  
49 iron deficiency, MCV - mean cell volume, NS – non significant, RCT - randomized controlled trial, s –  
50 seconds, SD – standard deviation, UC – umbilical cord, UCB – umbilical cord blood.  
51  
52  
53  
54  
55  
56  
57  
58  
59  
60

## Abstract

**BACKGROUND AND OBJECTIVE:** Umbilical cord blood (UCB) is a valuable stem cell source used for transplantation. Immediate umbilical cord (UC) clamping is normally practiced in UCB collection but delayed UC clamping is increasingly advocated to reduce possible infant anaemia. This policy obstructs collection of UCB for banking. The objective was to evaluate an UC clamping method that enables collection of altruistically donated UCB, without adverse effects for the donating infant. We investigated the consequences of different UC clamping times with regard to infant's iron status at the age of four months.

**DESIGN:** Prospective observational study with two historical controls.

**SETTING:** A university hospital in Stockholm, Sweden and a county hospital in Halland, Sweden.

**METHOD:** Iron status was assessed at four months in 200 prospectively recruited term infants whose UC was clamped 60 seconds (s) after birth in connection with UCB donation. The results were compared to data from a previously conducted randomized controlled trial including infants subjected to UC clamping at  $\leq 10$  s (n=200) or  $\geq 180$  s (n=200) after delivery.

**RESULTS:** After adjustment for age differences at the time of follow-up, serum ferritin concentrations were 77  $\mu\text{g/L}$ , 103  $\mu\text{g/L}$  and 114  $\mu\text{g/L}$  in the 10 s, 60 s and 180 s groups, respectively. The adjusted ferritin concentration was significantly higher in the 60 s group compared to the 10 s group ( $P=0.002$ ) while the difference between the 60 s and 180 s groups was not significant ( $P=0.29$ ).

**CONCLUSION:** Delaying UC clamping for 60 s, compared to 10 s, results in higher serum ferritin concentrations at four months in term infants. This study suggests that it is possible to obtain the iron preserving benefits from delayed UC clamping also in connection with altruistic UCB donation.

### Strengths and limitations of the study

- This study compares iron- and blood status at the age of four months in children whose UC were clamped after 60 s due to donation of UCB, with children whose UC were clamped  $\leq 10$  s or  $\geq 180$  s.
- In this study we focus on potential consequences for the UCB donors caused by different UC clamping times, and not the quality of the collected UCB.
- This prospective observational study uses historical controls and results should be interpreted with caution because of potential confounding bias.
- We did not use a non-inferiority approach for this study since we aimed to compare results after 60 s UC clamping with both 10 s- and 180 s UC clamping.

## INTRODUCTION

Umbilical cord blood (UCB) is a valuable stem cell source for the 30-50% of patients that need a hematopoietic stem cell transplantation, but who lack a suitable family or public registry donor [1 2].

More than 35.000 transplantations with UCB have been performed worldwide [1].

The number of hematopoietic stem cells in the UCB unit highly affects the outcome of transplantation [3 4]. A small cell dose in a transplanted unit is directly correlated with a delay in recovery of the immune system and lower incidence of sustained donor engraftment [5 6]. Large cell numbers are essential and closely correlated with the collected volume of UCB. Volume is dependent on the time of umbilical cord (UC) clamping [7]. The earlier the UC is clamped, the more blood is left to collect from the placenta and for this reason immediate UC clamping is normally practiced in UCB collection.

During the last decades, immediate UC clamping has been part of active management of labour with the aim to reduce maternal haemorrhage at birth [8 9]. Hence, the placenta and UCB, have been regarded as waste products following birth. However, immediate UC clamping may deprive infants of up to one third of the total fetoplacental blood volume [10 11] and increase the risk of iron deficiency (ID) in the first 3-6 months of life [12-16]. Iron deficiency is associated with impaired neurodevelopment affecting cognitive, motor, and behavioural skills in young children [17-19]. For this reason the World Health Organization recommends delayed UC clamping for 1-3 minutes after birth [20].

We hypothesized that if the UC is clamped at 60 seconds (s) after birth, a sufficient amount of blood will have passed from the placenta to the infant to reduce the risk of ID and anaemia while still allowing collection of UCB for banking [21]. The aim of the current study was to evaluate iron status and complete blood counts at the age of four months in infants who had the UC clamped after 60s in connection with UCB donation and compare the results to immediate ( $\leq 10$ s) and late ( $\geq 180$ s) UC clamping. In this study we focused on potential consequences for the donors only.

## MATERIALS AND METHODS

We performed an observational cohort study using one prospective clinical cohort and data from a previously performed randomized controlled trial (RCT)[13]. The prospectively recruited infants were born at Karolinska University Hospital Huddinge, Sweden between April 2012 and May 2015, to parents who agreed to donate UCB to the Swedish National Umbilical Cord Blood Bank, a public bank without profit interest. To enable collection of UCB, the UC was clamped after  $60 \pm 10$ s. The historical cohorts consisted of data from infants who were randomized to immediate (within 10s after birth) or late (after 180s) UC clamping, respectively, in a trial conducted by three of the co-authors at the Hospital of Halland in Halmstad, Sweden between April 2008 and September 2009 [13].

### Outcome measures

The primary outcome variable was ferritin as a measure of iron stores, at the age of four months and secondary outcomes included haemoglobin, transferrin saturation, soluble transferrin receptors, mean cell volume (MCV) as well as ID (defined as  $\geq 2$  iron indicators outside reference range with the following cut-off values: ferritin  $< 20 \mu\text{g/L}$ , [22] MCV  $< 73 \text{ fL}$ , [22] transferrin saturation  $< 10\%$  [23] and transferrin receptor  $> 7 \text{ mg/L}$  [13]). Since ferritin is an acute phase reactant, C reactive protein (CRP) was analysed in order to exclude falsely elevated ferritin measurements. The infant's dietary habits at four months were also considered as well as the relevance of infant sex for iron and blood status at that age.

### Sample size

A formal power calculation was not performed for the current study but the sample size was based on the group size in the original RCT by Andersson *et al.* 2011 (the historical cohorts). The power calculation by Andersson *et al.* showed that a group size of 200 would enable detection of a 29% difference in geometric mean serum ferritin between 10s and 180s UC clamping with a power of 80% and a significance level of 0.05, assuming a mean serum ferritin concentration of  $110 \mu\text{g/L}$  in the 180s-group while allowing an attrition of 25% [13]. Based on the results from Andersson *et al.*,

1  
2  
3 demonstrating a 45% difference in ferritin concentration between 10s and 180s UC clamping [13], we  
4  
5 decided to include 200 children also in the prospective group.  
6

### 7 **Study population and inclusion criteria**

8  
9 The same inclusion criteria applied for the prospective and historical cohorts: healthy mother,  
10  
11 normal, singleton pregnancy, gestational age 37+0 to 41+6 weeks and planned vaginal delivery with  
12  
13 cephalic presentation [13]. The mother also had to understand Swedish well enough to consent  
14  
15 participation in the study. In the prospectively recruited cohort, parents also had to agree to altruistic  
16  
17 donation of UCB, and to the modified UC clamping strategy. Exclusion criteria were also the same in  
18  
19 the three groups: smoking mother, serious congenital malformations, syndromes, or other congenial  
20  
21 diseases that could affect the outcome measures. For this study, we only included data from the RCT  
22  
23 that were handled according to per protocol, as compared to the analysis by intention to treat in the  
24  
25 original RCT [13]. Moreover, like the RCT, we only included children with CRP<10 in the analysis. All  
26  
27 parents donating UCB at Karolinska University Hospital Huddinge that met the inclusion criteria were  
28  
29 offered to participate in the study upon arrival at the delivery unit. Midwives were instructed to  
30  
31 clamp the UC 60s after birth in deliveries where parents had consented to participate in the study.  
32  
33 Staff in charge of collection of UCB measured the exact timing of UC clamping using a digital timer.  
34  
35 Only children whose UC were clamped at 60 ±10s were included in the study. Oral and written  
36  
37 informed consent was obtained from one or both of the parents. The study was approved by the  
38  
39 regional ethical review board in Stockholm (2011/2142-31/3) and the RCT was approved by the  
40  
41 regional ethical review board at Lund University (41/2008).  
42  
43  
44  
45

### 46 **Data collection and blood samples**

47  
48 Midwives were instructed to hold the new-born baby below the uterine level for the first 30s before  
49  
50 placing the infant on the mother's abdomen, in accordance with the study by Andersson et al 2011  
51  
52 [13]. The UC clamping technique used in the prospectively recruited cohort was similar to the  
53  
54 historical groups except for the timing. Venous blood samples were analysed at birth from the UC, at  
55  
56 two to three days of age in connection with metabolic screening and at four months (±21 days) at a  
57  
58  
59  
60

1  
2  
3 scheduled follow-up visit. At birth and at four months, serum ferritin, haemoglobin, haematocrit,  
4  
5 MCV, reticulocyte count, transferrin saturation, transferrin receptor and CRP were analysed and at  
6  
7 two to three days of age we analysed haemoglobin, haematocrit and bilirubin. EDTA tubes were used  
8  
9 for blood count and serum separator tubes for iron status, bilirubin and CRP (Microvette, Sarstedt AG  
10  
11 & Co, Nümbrecht, Germany). Blood status was analysed using equal methods and equipment in both  
12  
13 the laboratory at Karolinska University Hospital (Sysmex XE5000, Sysmex, Kobe, Japan) and at the  
14  
15 Hospital of Halland (Sysmex XE2100, Sysmex, Kobe, Japan). Analysis of iron status and CRP could be  
16  
17 performed at the same laboratory as in the RCT [13], and therefore the blood samples collected at  
18  
19 Karolinska University Hospital were centrifuged and the serum kept at -70 degrees Celsius before  
20  
21 sent for analysis at the Clinical Chemistry Laboratory at the Hospital of Halland. The samples were  
22  
23 then thawed and analysed using a Cobas 6000 (Roche Diagnostics, Basel, Switzerland), the same  
24  
25 method as in the RCT [13].  
26  
27

### 28 **Statistical analysis**

29  
30 Analyses on the two historical cohorts, 10s and 180s, were calculated only on infants receiving  
31  
32 intervention per protocol in order to obtain clearly defined groups according to time of UC clamping.  
33  
34 Baseline characteristics were compared across groups using analysis of variance (ANOVA). Means of  
35  
36 outcome measures in the three cohorts were compared using the Bonferroni method. We also  
37  
38 performed pairwise comparisons (60s vs 10s and 60s vs 180s) using Student's t-test for variables with  
39  
40 normal distribution that were statistically significant in the Bonferroni analyses. Ferritin  
41  
42 concentration was log<sub>10</sub> transformed for analysis because of skewed distribution and the results  
43  
44 were presented as geometric means. Categorical variables were compared between groups using  
45  
46 Fisher's Exact test for pairwise comparisons. Adjusted group means were compared using ANOVA  
47  
48 and a binary logistic regression model was used to adjust for sex and age in the evaluation of ID at  
49  
50 four months. A P-value less than 0.05 were considered significant. No imputation of missing data was  
51  
52 performed. Loss to follow-up was registered, but not examined further. IBM SPSS for Windows,  
53  
54 version 22 was used for the analyses.  
55  
56  
57  
58  
59  
60



## RESULTS

Of the 200 prospectively recruited infants, 191 were included in the analysis as compared to 166 in the 10s and 168 in the 180s groups. Infants lost to follow up or excluded due to not fulfilling inclusion criteria are shown in Fig 1.

### Baseline data

There were no significant differences in the 60s group as compared to the 10s and 180s groups with regard to maternal or neonatal characteristics. The 10s group had higher UC haemoglobin (163 vs 153 g/L,  $P<0.001$ ) and higher UC haematocrit (48.7 vs 47.0%,  $P=0.005$ ) than the 60s group. There were no significant differences between the 60s and the 180s groups (Table 1).

### Two to three day-follow-up

At two to three days, blood samples were obtained from 140 infants in the 10s group, 107 in the 60s group, and 141 in the 180s group (Figure 1). The prevalence of anaemia was higher in the 10s compared to the 60s and 180s groups (9 (6.4%), 2 (1.9%) and 2 (1.4%)) respectively ( $P=0.04$ ).

Haemoglobin was lower in the 10s and 60s groups compared to the 180s group; 175, 180 and 189 g/L respectively ( $P=0.001$  for 60s vs 180s). Bilirubin did not differ between the groups. Anaemic children were referred for further diagnostics but none needed treatment.

### Primary outcome

In total 468 (78%) infants had follow up at four months (children excluded or lost to follow up are shown in Figure 1). In the 60s group, the infants ( $n=147$ ) were four days older than the historical groups from the RCT ( $126\pm 7$  days vs  $122\pm 6$  days,  $P<0.001$ ). The geometric mean ferritin levels were 80, 96 and 117  $\mu\text{g/L}$  respectively in the 10s, 60s and 180s groups ( $P=0.052$  for 10s vs 60s;  $P=0.02$  for 60s vs 180s) (Table 2). After adjustment for the age difference, the geometric means were 77, 103 and 114  $\mu\text{g/L}$  respectively ( $P=0.002$  for 10s vs 60s;  $P=0.29$  for 60s vs 180s) (Table 3).

### Secondary outcomes

All secondary outcome variables are shown in Table 2. Haemoglobin levels at four months were higher in the 60s group compared to 10s and 180s, but the difference did not remain in the age

1  
2  
3 adjusted model (Table 3). There were no statistically significant differences in the prevalence of  
4  
5 anaemia in the 60s group as compared to the other two groups (Table 4). After adjustment for age at  
6  
7 the time of follow-up, there were no differences between the 10s and 60s groups in haematocrit,  
8  
9 MCV, reticulocyte count, transferrin receptor or transferrin saturation. The 60s group had  
10  
11 significantly lower adjusted MCV and higher adjusted transferrin receptor compared to the 180s  
12  
13 group, but there were no differences in haematocrit, reticulocyte count or transferrin saturation  
14  
15 (Table 3). The prevalence of ID was 8 (5.2%), 7 (4.8%) and 1 (0.7%) respectively in the 10s, 60s and  
16  
17 180s groups ( $P>0.99$  for 10s vs 60s and  $P=0.04$  for 60s vs 180s) (Table 4). After statistical adjustments  
18  
19 for sex and age at the time of follow-up, the prevalence of ID did not differ between the 60s group  
20  
21 and the two other groups. The proportion of infants that were exclusively breast fed at four months  
22  
23 did not differ between the groups (79 (52%), 92 (58%) and 89 (56%) respectively in the 10s, 60s and  
24  
25 180s groups. The impact of exclusive breast feeding on ferritin concentration and ID were further  
26  
27 assessed in an adjusted model but no correlation was found (data not shown).  
28  
29

### 30 31 **Sex differences**

32  
33 Iron and blood status at four months were further assessed by analysing differences according to  
34  
35 infant sex. When data from the three cohorts were analysed together, geometric mean ferritin was  
36  
37 lower in boys than in girls and ID was more prevalent amongst boys (Fig 2A and 2B). Haemoglobin  
38  
39 concentrations did not differ significantly between boys and girls and neither did the prevalence of  
40  
41 anaemia (data not shown).  
42  
43

### 44 45 **DISCUSSION**

46  
47 We compared infants' iron and blood status at the age of four months after three different UC  
48  
49 clamping time intervals (60s versus  $\leq 10$ s, and  $\geq 180$ s, respectively). Previous studies have compared  
50  
51 immediate and late UC clamping but the definition of "late" in these studies varies from 60s to 180s  
52  
53 or after birth of the placenta [12 14 15]. The current study evaluates an intermediate UC clamping  
54  
55 strategy that can be used in connection with altruistic donation of UCB for clinical banking. When  
56  
57 asking parents to donate their child's UCB for the potential good of others, it is essential to inform of  
58  
59

1  
2  
3 possible consequences for the child. We demonstrated that after adjustment for age difference at  
4  
5 the time of follow-up, there were no statistically significant differences in ferritin concentration  
6  
7 between the 60s and 180s groups but the 60s group had significantly higher ferritin concentrations  
8  
9 compared to 10s. The main reason for the effect of age on ferritin during infancy is rapid growth  
10  
11 which leads to a rapidly expanding blood volume and depletion of iron stores [16].  
12

13  
14 Results from the present study are in accordance with a Brazilian RCT that demonstrated higher  
15  
16 ferritin concentration at the age of three months in children whose UC were clamped after 60s  
17  
18 compared to immediate UC clamping [24]. However, our findings are in contrast to a study by  
19  
20 Cernadas et al, who reported no differences in ferritin six months after birth comparing 15s and 60s  
21  
22 UC clamping. The difference in ferritin between the 60s and 180s groups were not presented [25].  
23  
24 The present study indicates that a 60s delay before UC clamping results in a mean serum ferritin at 4  
25  
26 months of age corresponding to 90% of the mean ferritin after 180s UC clamping  
27

28  
29 In the current study, children in the 60s group had the lowest haemoglobin of all three groups at  
30  
31 birth (10s 163 g/L, 60s 153 g/L, 180s 158 g/L) but at four months, there were no longer any  
32  
33 differences between the groups in our adjusted model. The original RCT as well as a Cochrane report  
34  
35 found higher concentrations of haemoglobin after immediate than late UC clamping at birth [13 15].  
36  
37 As speculated in a previous publication, this difference may not reflect true difference in  
38  
39 haemoglobin but could be a result of trans endothelial plasma leakage in the UC after UC clamping  
40  
41 [13].  
42

43  
44 The prevalence of ID was higher in the 10s and 60s groups compared to the 180s group. However,  
45  
46 when adjusting for sex and age at the time of follow-up, there were no longer any statistically  
47  
48 significant differences between the three groups. In accordance with previous studies on ID in  
49  
50 infancy, we found that at four months, boys had significantly lower geometric mean ferritin and  
51  
52 more often ID than girls [26 27]. Nevertheless, the aim of the study was not to compare differences  
53  
54 according to sex, and the groups were therefor too small to draw any reliable conclusions of sex and  
55  
56 ID. It has been suggested that the differences in iron status between the two sexes may be hormone-  
57  
58  
59  
60

1  
2  
3 related but it is also influenced by genetic factors, which may differ in populations with different  
4  
5 ethnicity [27]. Also, when considering the generalisability of this study, readers should bear in mind  
6  
7 that all children were placed below the uterine level for 30s directly after birth. This may be in  
8  
9 contrast to the practice in other delivery settings, where the children are often placed directly on the  
10  
11 woman's abdomen, which may affect the speed of the placental transfusion.  
12

### 13 **Limitations of the study**

14  
15 A limitation of this study is that we have no record of the parents' ethnic or socio-economic  
16  
17 background, and we were therefore unable to draw any conclusions on possible impact of these  
18  
19 factors. When comparing different interventions, RCTs are regarded as the golden standard.  
20  
21 However, randomization into 10s UC clamping for this study was considered unethical since there is  
22  
23 evidence that children benefit from prolonged placental transfusion for at least 60s, and the clinical  
24  
25 routine in Sweden is to wait 180s before UC clamping in normal deliveries. We used the historical  
26  
27 cohorts from the RCT in Halmstad, Sweden as controls in this study. The prospectively recruited  
28  
29 cohort (60s) is from a large birth clinic in Stockholm, Sweden while the controls are from a smaller  
30  
31 town where the participants were recruited two to five years earlier. Although the inclusion criteria  
32  
33 were the same and pregnant mothers in Sweden follow the same well-controlled antenatal program  
34  
35 and the baseline data showed no significant differences in maternal or infant characteristics, it is  
36  
37 difficult to know if the study populations are homogenous. We did not use a non-inferiority approach  
38  
39 for this study since we aimed to compare results after 60s UC clamping with 10s and 180s. Nor did we  
40  
41 perform a power calculation when designing the study, but included an equally large group as the  
42  
43 two historical groups. This is a weakness which, should be taken into consideration. We have taken  
44  
45 measures to avoid systematic biases caused by differences in laboratory routines between the two  
46  
47 hospitals by using the same laboratory for analysing the iron status variables as well as CRP.  
48  
49  
50 Collection of UCB for transplantation is a growing and life-saving practice. Tens of thousands UCB  
51  
52 units are altruistically donated and stored for public use each year, and as a result new-borns are  
53  
54 exposed to limited UC clamping time. The idea that UCB left in the placenta after birth is a mere  
55  
56  
57  
58  
59  
60

1  
2  
3 waste that is thrown away if not collected is obsolete. Optimizing UC clamping time and investigating  
4  
5 the clinical significance to minimize risks for the infant while still enabling collection of UCB for  
6  
7 transplantation is a great, but necessary, challenge. Furthermore, parents have the right to know that  
8  
9 not all collected UCB can be used for transplantation. If the amount of blood in a collected UCB unit  
10  
11 is too small, it will not be processed and banked for practical and economic reasons.  
12

### 13 14 15 **CONCLUSION**

16  
17 This observational study indicates that in a healthy Swedish population, UC clamping after 60s  
18  
19 reduces the risk for low iron stores at four months of life compared to UC clamping at 10s. After  
20  
21 adjustment for age and sex, there were no statistically significant differences in ferritin concentration  
22  
23 between 60 and 180s UC clamping. 60s UC clamping is therefore preferable to immediate UC  
24  
25 clamping and enables collection of UCB for transplantation. Delaying UC clamping may be more  
26  
27 important in boys than in girls to avoid ID in early childhood. Larger studies with long term follow-up  
28  
29 is needed to establish the clinical relevance of different UC clamping strategies.  
30  
31

### 32 33 **CONTRIBUTORS**

34  
35 Dr C. Götherström conceptualized and designed the study, analyzed data, critically revised and  
36  
37 approved the final manuscript as submitted. Mrs U. Askelöf conceptualized and designed the study,  
38  
39 carried out all data collection in the prospective cohort, carried out all analyses, drafted the initial  
40  
41 manuscript, and approved the final manuscript as submitted. Dr O. Andersson designed the data  
42  
43 collection instruments, contributed to the study design and provided data for the historical cohorts.  
44  
45 He also carried out the initial analyses, critically reviewed and revised the manuscript, and approved  
46  
47 the final manuscript as submitted. Profs M. Domellöf, A. Fasth, L. Hellström-Westas, M. Westgren,  
48  
49 Associate Profs K. Pettersson and I. Wiklund and Dr B. Hallberg participated in the study design,  
50  
51 reviewed and revised the manuscript and approved the final manuscript as submitted.  
52  
53  
54  
55  
56  
57  
58  
59  
60

**ACKNOWLEDGEMENTS**

The authors thank Harjeet Kaur Malhi, Astrid Börjesson, Malin Hjertqvist and Camilla Halzius, the staff at the delivery ward at Karolinska University Hospital Huddinge and all mothers and infants who participated in the study. This study was supported by grants from The Swedish Childhood Cancer Foundation, The regional agreement on medical training and clinical research (ALF) in Stockholm and Gothenburg and The Dr Åke Olsson Foundation for Hematological Research, Stockholm.

For peer review only

**TABLE 1.** Baseline characteristics of mothers and infants according to time for umbilical cord clamping

|                                            | Umbilical cord clamping time |              |                    | P       |
|--------------------------------------------|------------------------------|--------------|--------------------|---------|
|                                            | 10s<br>n=166 (HC)            | 60s<br>n=191 | 180s<br>n=168 (HC) |         |
| <b>Maternal characteristics</b>            |                              |              |                    |         |
| Age (years)                                | 31.7(4.2)                    | 30.7(4.7)    | 30.8(4.9)          | NS      |
| Parity (including study child)             | 1.81 (0.87)                  | 1.86(0.76)   | 1.76 (0.74)        | NS      |
| Weight at first antenatal visit (kg)       | 66.4(12.0)                   | 67.3(11.5)   | 67.3(12.1)         | NS      |
| Body mass index                            | 23.6(3.8)                    | 24.5(3.9)    | 23.9(3.6)          | NS      |
| Haemoglobin at first antenatal visit (g/L) | 128(9)                       | 128(10)      | 128(11)            | NS      |
| No (%) of vaginal deliveries:              |                              |              |                    |         |
| Non-instrumental                           | 157(95)                      | 184(96)      | 157(94)            | NS      |
| Vacuum extraction                          | 8(5)                         | 7(4)         | 11(7)              | NS      |
| Forceps                                    | 1(0.6)                       | 0(0)         | 0(0)               | NS      |
| <b>Infant characteristics</b>              |                              |              |                    |         |
| Gestational age (weeks)                    | 40.0(1.1)                    | 40.0(1.0)    | 40.0(1.1)          | NS      |
| No (%) of males                            | 83(50)                       | 98(51)       | 73(43)             | NS      |
| Birth weight (g)                           | 3523(483)                    | 3603(454)    | 3633(464)          | NS      |
| Birth length (cm)                          | 50.7(1.9)                    | 50.6(1.8)    | 50.9(1.9)          | NS      |
| Head circumference (cm)                    | 34.7(1.3)                    | 35.1(1.3)    | 35.0(1.4)          | NS      |
| Umbilical cord haemoglobin (g/L)           | 163(15)                      | 153(20)      | 158(18)            | <0.001* |
| Umbilical cord haematocrit (%)             | 48.7(4.3)                    | 47.0(5.5)    | 47.1(5.0)          | 0.005** |

Values are means (SD) unless stated otherwise. P<0.05 was considered significant.

NS=non-significant; HC= Historical cohort.

\*Comparison of 10s and 60s. For 180s and 60s, P=0.063.

\*\*Comparison of 10s and 60s. For 180s and 60s, P>0.99.

**TABLE 2.** Outcome measures at the age of four months in infants whose umbilical cord were clamped after 10s, 60s or 180s

|                                           | Umbilical cord clamping time |                |                    | 60s vs 10s                  |        | 60s vs 180s                 |        |
|-------------------------------------------|------------------------------|----------------|--------------------|-----------------------------|--------|-----------------------------|--------|
|                                           | 10s<br>n=153 (HC)            | 60s<br>n=147   | 180s<br>n=148 (HC) | Mean difference<br>(95% CI) | P      | Mean difference<br>(95% CI) | P      |
| Infant age (days)                         | 122 (6)                      | 126 (7)        | 122 (6)            | 5 (3 to 6)                  | <0.001 | 4 (3 to 6)                  | <0.001 |
| <b>Main outcome measures</b>              |                              |                |                    |                             |        |                             |        |
| Geometric mean (range)<br>ferritin (µg/L) | 80 (33 to 191)               | 96 (44 to 208) | 117 (58 to 232)    | 0.83 (0.69 to 1.45)*        | 0.052  | 1.21 (1.03 to 1.44)*        | 0.02   |
| Haemoglobin (g/L)                         | 113 (7)                      | 115 (8)        | 113 (8)            | 2 (0 to 4)                  | 0.047  | 2 (0 to 4)                  | 0.03   |
| <b>Blood count</b>                        |                              |                |                    |                             |        |                             |        |
| Haematocrit (%)                           | 33.0 (2.0)                   | 33.3 (2.2)     | 32.7 (2.1)         | 0.3 (-0.2 to 0.8)           | 0.19   | 1 (0 to 1)                  | 0.02   |
| Mean cell volume (fL)                     | 77.9 (3.1)                   | 77.7 (3.7)     | 79.2 (3.0)         | -0.2 (-1 to 0.6)            | 0.67   | -1.5 (-2.3 to -0.7)         | <0.001 |
| Reticulocyte count (x10 <sup>9</sup> /L)  | 37 (11)                      | 36 (11)        | 40 (11)            | -1 (-4 to 1)                | 0.39   | -4 (-6 to -1)               | 0.01   |
| <b>Iron status</b>                        |                              |                |                    |                             |        |                             |        |
| Transferrin receptor (mg/L)               | 4.00 (0.80)                  | 4.07 (0.92)    | 3.71 (0.69)        | 0.07 (-0.13 to 0.26)        | 0.51   | 0.35 (0.17 to 0.54)         | <0.001 |
| Transferrin saturation (%)                | 16 (6)                       | 16 (8)         | 18 (6)             | 1 (-1 to 2)                 | 0.40   | -2 (-3 to 0)                | 0.03   |

Values are means (SD) unless stated otherwise. HC= Historical cohort.

\*Geometric mean ratio (95% CI for geometric mean).

Successful analyses in the 60s and 180s groups: haemoglobin (n=140, 144), haematocrit, mean cell volume, reticulocyte count (n=135, 144), ferritin (n=147, 148), transferrin receptor (n=147, 148), transferrin saturation (n=145, 148).



**TABLE 3.** Outcome measures at the age of four months adjusted for infant age

|                                           | Umbilical cord clamping time |                     |                     | P<br>60s vs 10s | P<br>60s vs 180s |
|-------------------------------------------|------------------------------|---------------------|---------------------|-----------------|------------------|
|                                           | Adjusted means (95% CI)      |                     |                     |                 |                  |
|                                           | 10s<br>n=152 (HC)            | 60s<br>n=147        | 180s<br>n=148 (HC)  |                 |                  |
| <b>Main outcome measures</b>              |                              |                     |                     |                 |                  |
| Geometric mean (range)<br>ferritin (µg/L) | 77 (68 to 87)                | 103 (90 to 117)     | 114 (100 to 129)    | 0.002           | 0.29             |
| Haemoglobin (g/L)                         | 113 (112 to 115)             | 114 (113 to 116)    | 113 (112 to 114)    | 0.30            | 0.17             |
| <b>Blood count</b>                        |                              |                     |                     |                 |                  |
| Haematocrit (%)                           | 33.1 (32.7 to 33.4)          | 33.1 (32.8 to 33.5) | 32.7 (32.4 to 33.1) | 0.30            | 0.12             |
| Mean cell volume (fL)                     | 77.8 (77.3 to 78.3)          | 77.9 (77.3 to 78.4) | 79.1 (78.6 to 79.6) | 0.30            | 0.003            |
| Reticulocyte count (x10 <sup>9</sup> /L)  | 36.9 (35.2 to 38.7)          | 37.0 (35.0 to 38.9) | 39.4 (37.6 to 41.2) | 0.99            | 0.07             |
| <b>Iron status</b>                        |                              |                     |                     |                 |                  |
| Transferrin receptor (mg/L)               | 4.01 (3.87 to 4.14)          | 4.05 (3.92 to 4.19) | 3.72 (3.59 to 3.85) | 0.62            | 0.001            |
| Transferrin saturation (%)                | 15.7 (14.7 to 16.7)          | 16.6 (15.5 to 17.7) | 18.1 (17 to 19.2)   | 0.25            | 0.06             |

Values are means (95% CI) adjusted for infant age (days from birth) unless stated otherwise.

HC= Historical cohort. Successful analyses for the 60s group were: ferritin (n=147), haemoglobin (n=140), haematocrit, mean cell volume, reticulocyte count (n=135), transferrin receptor, and transferrin saturation (n=145). For the 180s group; blood status (n=144).

**TABLE 4.** Infants with iron status indicators outside reference limits at the age of 4 months according to umbilical cord clamping time

|                              | Umbilical cord clamping time |              |                    | P<br>60s vs 10s | P<br>60s vs 180s |
|------------------------------|------------------------------|--------------|--------------------|-----------------|------------------|
|                              | 10s<br>n=153 (HC)            | 60s<br>n=147 | 180s<br>n=148 (HC) |                 |                  |
| Ferritin <20 µg/L            | 11 (7.2)                     | 4 (2.7)      | 0 (0)              | 0.11            | 0.06             |
| Anaemia (Hb<105 g/L)         | 20 (13.1)                    | 16 (11.4)    | 20 (13.9)          | 0.72            | 0.60             |
| Mean cell volume <73 fL      | 8 (5.2)                      | 14 (10.4)    | 3 (2.1)            | 0.12            | 0.01             |
| Transferrin saturation <10%  | 22 (14.4)                    | 15 (10.3)    | 8 (5.4)            | 0.38            | 0.13             |
| Transferrin receptor >7 mg/L | 0 (0)                        | 2 (1.4)      | 0 (0)              | 0.24            | 0.25             |
| Iron deficiency*             | 8 (5.2)                      | 7 (4.8)      | 1 (0.7)            | 1.00            | 0.04             |

Values are unadjusted numbers (%). HC= Historical cohort.

Numbers of successful analyses: mean cell volume (n=153, 135, 144), transferrin saturation (n=153, 145, 148), anaemia (n=153, 140, 144).

## REFERENCES

1. Bone Marrow Donors Worldwide. Published 2015. Secondary Bone Marrow Donors Worldwide. Published 2015. 2015. <http://www.bmdw.org/>.
2. Brunstein C, Setubal D, J W. Expanding the role of umbilical cord blood transplantation. *Br J Haematol* 2007;**137**(1):20-35 doi: 10.1111/j.1365-2141.2007.06521.x[published Online First: Epub Date]].
3. Copelan EA. Hematopoietic stem-cell transplantation. *The New England journal of medicine* 2006;**354**(17):1813-26 doi: 10.1056/NEJMra052638[published Online First: Epub Date]].
4. Migliaccio AR, Adamson JW, Stevens CE, et al. Cell dose and speed of engraftment in placental/umbilical cord blood transplantation: graft progenitor cell content is a better predictor than nucleated cell quantity. *Blood* 2000;**96**(8):2717-22
5. Barker JN, Byam CE, Kernan NA, et al. Availability of cord blood extends allogeneic hematopoietic stem cell transplant access to racial and ethnic minorities. *Biol Blood Marrow Transplant* 2010;**16**(11):1541-8 doi: 10.1016/j.bbmt.2010.08.011[published Online First: Epub Date]].
6. Gluckman E, Koegler G, Rocha V. Human leukocyte antigen matching in cord blood transplantation. *Semin Hematol* 2005;**42**(2):85-90 doi: 10.1053/j.seminhematol.2005.01.006[published Online First: Epub Date]].
7. Allan DS, Scrivens N, Lawless T, et al. Delayed clamping of the umbilical cord after delivery and implications for public cord blood banking. *Transfusion* 2016;**56**(3):662-5 doi: 10.1111/trf.13424[published Online First: Epub Date]].
8. Spencer PM. Controlled cord traction in management of the third stage of labour. *BMJ (Clinical research ed)* 1962;**1**:1728-32
9. Winter C, Macfarlane A, Deneux-Tharaux C, et al. Variations in policies for management of the third stage of labour and the immediate management of postpartum haemorrhage in Europe. *BJOG : an international journal of obstetrics and gynaecology* 2007;**114**(7):845-54 doi: 10.1111/j.1471-0528.2007.01377.x[published Online First: Epub Date]].
10. Yao AC, Moinian M, Lind J. Distribution of blood between infant and placenta after birth. *Lancet* 1969;**2**(7626):871-3
11. Mercer JS, Erickson-Owens DA. Rethinking placental transfusion and cord clamping issues. *J Perinat Neonatal Nurs* 2012;**26**(3):202-17; quiz 18-9 doi: 10.1097/JPN.0b013e31825d2d9a[published Online First: Epub Date]].
12. Hutton EK, Hassan ES. Late vs early clamping of the umbilical cord in full-term neonates: systematic review and meta-analysis of controlled trials. *JAMA : the journal of the American Medical Association* 2007;**297**(11):1241-52 doi: 10.1001/jama.297.11.1241[published Online First: Epub Date]].
13. Andersson O, Hellström-Westas L, Andersson D, et al. Effect of delayed versus early umbilical cord clamping on neonatal outcomes and iron status at 4 months: a randomised controlled trial. *BMJ (Clinical research ed)* 2011;**343**:d7157 doi: 10.1136/bmj.d7157[published Online First: Epub Date]].
14. Chaparro CM, Neufeld LM, Tena Alavez G, et al. Effect of timing of umbilical cord clamping on iron status in Mexican infants: a randomised controlled trial. *Lancet* 2006;**367**(9527):1997-2004 doi: 10.1016/s0140-6736(06)68889-2[published Online First: Epub Date]].
15. McDonald S, Middleton P, Dowswell T, et al. Effect of timing of umbilical cord clamping of term infants on maternal and neonatal outcomes. *Evid Based Child Health* 2014;**9**(2):303-97 doi: 10.1002/ebch.1971[published Online First: Epub Date]].
16. Oski F. Iron deficiency in infancy and childhood. *The New England journal of medicine* 1993;**329**(3)
17. Lozoff B, Beard J, Connor J, et al. Long-lasting neural and behavioral effects of iron deficiency in infancy. *Nutrition reviews* 2006;**64**(5 Pt 2):S34-43; discussion S72-91
18. Andersson O, Lindquist B, Lindgren M, et al. Effect of Delayed Cord Clamping on Neurodevelopment at 4 Years of Age: A Randomized Clinical Trial. *JAMA pediatrics*

- 2015;**169**(7):631-8 doi: 10.1001/jamapediatrics.2015.0358[published Online First: Epub Date]].
19. Berglund S, Westrup B, Hägglöf B, et al. Effects of iron supplementation of LBW infants on cognition and behavior at 3 years. *Pediatrics* 2013;**131**(1):47-55 doi: 10.1542/peds.2012-0989[published Online First: Epub Date]].
20. World Health Organization. Delayed clamping of the umbilical cord to reduce infant anaemia., 2014.
21. Frandberg S, Konar J, Rydberg L, Fasth A, Holgersson J. High quality cord blood banking is feasible with delayed clamping practices. The eight-year experience and current status of the national Swedish Cord Blood Bank. *Cell and tissue banking* 2016 doi: 10.1007/s10561-016-9565-6[published Online First: Epub Date]].
22. Domellöf M, Dewey K, Lönnerdal B, et al. The diagnostic criteria for iron deficiency in infants should be re-evaluated. *The Journal of nutrition* 2002;**132**(12)
23. Saarinen U, Siimes M. Developmental changes in serum iron, total iron-binding capacity, and transferrin saturation in infancy. *The Journal of Pediatrics* 1977;**91**(6):875-77
24. Venâncio SI, Levy RB, Saldiva SR, et al. [Effects of delayed cord clamping on hemoglobin and ferritin levels in infants at three months of age]. *Cad Saude Publica* 2008;**24**(2):323-31
25. Ceriani Cernadas JM, Carroli G, Pellegrini L, et al. [The effect of early and delayed umbilical cord clamping on ferritin levels in term infants at six months of life: a randomized, controlled trial]. *Arch Argent Pediatr* 2010;**108**(3):201-8 doi: 10.1590/s0325-00752010000300005[published Online First: Epub Date]].
26. Georgieff MK. Long-term brain and behavioral consequences of early iron deficiency. *Nutr Rev* 2011;**69 Suppl 1**:S43-8 doi: 10.1111/j.1753-4887.2011.00432.x[published Online First: Epub Date]].
27. Domellöf M, Lönnerdal B, Dewey K, et al. Sex differences in iron status during infancy. *Pediatrics* 2002;**110**(3):545-52

## FIGURE LEGENDS

**FIGURE 1.** Flow chart of the study populations.

**FIGURE 2.** Differences in infants' iron status at the age of 4 months according to sex in three groups divided according to umbilical cord clamping time. **A:** Geometric mean ferritin according to sex and time for umbilical cord clamping, **B:** Proportion of children with iron deficiency according to time for umbilical cord clamping and sex.

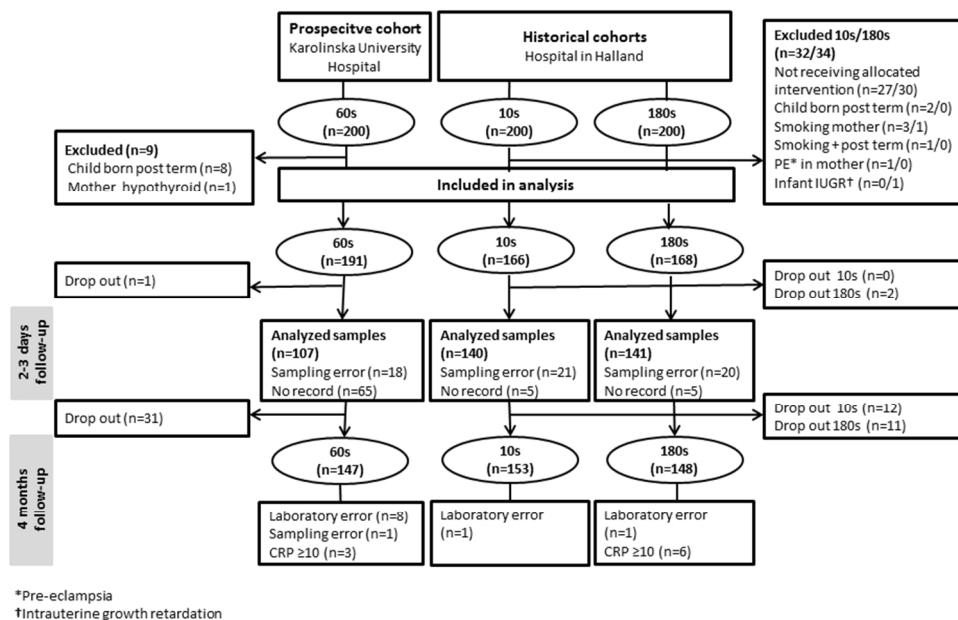

FIGURE 1. Flow chart of the study populations.

254x190mm (96 x 96 DPI)

1  
2  
3  
4  
5  
6  
7  
8  
9  
10  
11  
12  
13  
14  
15  
16  
17  
18  
19  
20  
21  
22  
23  
24  
25  
26  
27  
28  
29  
30  
31  
32  
33  
34  
35  
36  
37  
38  
39  
40  
41  
42  
43  
44  
45  
46  
47  
48  
49  
50  
51  
52  
53  
54  
55  
56  
57  
58  
59  
60

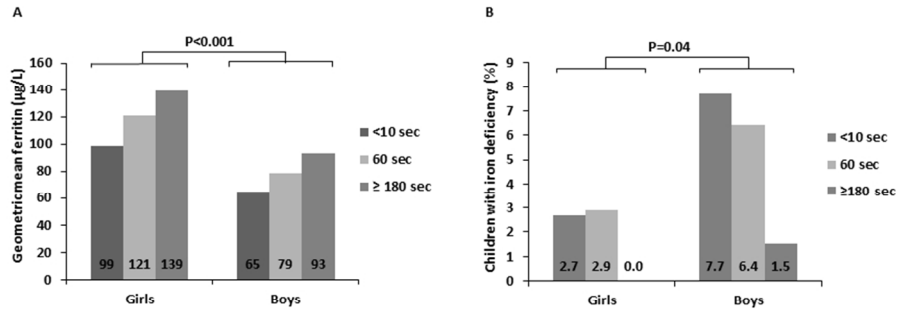

FIGURE 2. Differences in infants' iron status at the age of 4 months according to sex in three groups divided according to umbilical cord clamping time. A: Geometric mean ferritin according to sex and time for umbilical cord clamping, B: Proportion of children with iron deficiency according to time for umbilical cord clamping and sex.

254x190mm (96 x 96 DPI)

only

STROBE 2007 (v4) Statement—Checklist of items that should be included in reports of *cohort studies*

| Section/Topic                | Item # | Recommendation                                                                                                                                                                       | Reported on page # |
|------------------------------|--------|--------------------------------------------------------------------------------------------------------------------------------------------------------------------------------------|--------------------|
| Title and abstract           | 1      | (a) Indicate the study's design with a commonly used term in the title or the abstract                                                                                               | 1, 2               |
|                              |        | (b) Provide in the abstract an informative and balanced summary of what was done and what was found                                                                                  | 2                  |
| <b>Introduction</b>          |        |                                                                                                                                                                                      |                    |
| Background/rationale         | 2      | Explain the scientific background and rationale for the investigation being reported                                                                                                 | 3                  |
| Objectives                   | 3      | State specific objectives, including any prespecified hypotheses                                                                                                                     | 3                  |
| <b>Methods</b>               |        |                                                                                                                                                                                      |                    |
| Study design                 | 4      | Present key elements of study design early in the paper                                                                                                                              | 4                  |
| Setting                      | 5      | Describe the setting, locations, and relevant dates, including periods of recruitment, exposure, follow-up, and data collection                                                      | 4                  |
| Participants                 | 6      | (a) Give the eligibility criteria, and the sources and methods of selection of participants. Describe methods of follow-up                                                           | 4, 5               |
|                              |        | (b) For matched studies, give matching criteria and number of exposed and unexposed                                                                                                  | Not applicable     |
| Variables                    | 7      | Clearly define all outcomes, exposures, predictors, potential confounders, and effect modifiers. Give diagnostic criteria, if applicable                                             | 4, 5               |
| Data sources/<br>measurement | 8*     | For each variable of interest, give sources of data and details of methods of assessment (measurement). Describe comparability of assessment methods if there is more than one group | 5, 6               |
| Bias                         | 9      | Describe any efforts to address potential sources of bias                                                                                                                            | 6, 10              |
| Study size                   | 10     | Explain how the study size was arrived at                                                                                                                                            | 4, 5               |
| Quantitative variables       | 11     | Explain how quantitative variables were handled in the analyses. If applicable, describe which groupings were chosen and why                                                         |                    |
| Statistical methods          | 12     | (a) Describe all statistical methods, including those used to control for confounding                                                                                                | 6                  |
|                              |        | (b) Describe any methods used to examine subgroups and interactions                                                                                                                  | Not applicable     |
|                              |        | (c) Explain how missing data were addressed                                                                                                                                          | 6, 7               |
|                              |        | (d) If applicable, explain how loss to follow-up was addressed                                                                                                                       | 6, 7               |
|                              |        | (e) Describe any sensitivity analyses                                                                                                                                                | Not applicable     |
| <b>Results</b>               |        |                                                                                                                                                                                      |                    |

|                          |     |                                                                                                                                                                                                              |                |
|--------------------------|-----|--------------------------------------------------------------------------------------------------------------------------------------------------------------------------------------------------------------|----------------|
| Participants             | 13* | (a) Report numbers of individuals at each stage of study—eg numbers potentially eligible, examined for eligibility, confirmed eligible, included in the study, completing follow-up, and analysed            | Fig 1, 6, 7    |
|                          |     | (b) Give reasons for non-participation at each stage                                                                                                                                                         | Fig 1          |
|                          |     | (c) Consider use of a flow diagram                                                                                                                                                                           | Fig 1          |
| Descriptive data         | 14* | (a) Give characteristics of study participants (eg demographic, clinical, social) and information on exposures and potential confounders                                                                     | 4, 5           |
|                          |     | (b) Indicate number of participants with missing data for each variable of interest                                                                                                                          | Tables 1-4     |
|                          |     | (c) Summarise follow-up time (eg, average and total amount)                                                                                                                                                  | 7              |
| Outcome data             | 15* | Report numbers of outcome events or summary measures over time                                                                                                                                               | Not applicable |
| Main results             | 16  | (a) Give unadjusted estimates and, if applicable, confounder-adjusted estimates and their precision (eg, 95% confidence interval). Make clear which confounders were adjusted for and why they were included | 7              |
|                          |     | (b) Report category boundaries when continuous variables were categorized                                                                                                                                    | Not applicable |
|                          |     | (c) If relevant, consider translating estimates of relative risk into absolute risk for a meaningful time period                                                                                             | Not applicable |
| Other analyses           | 17  | Report other analyses done—eg analyses of subgroups and interactions, and sensitivity analyses                                                                                                               | Fig 2          |
| <b>Discussion</b>        |     |                                                                                                                                                                                                              |                |
| Key results              | 18  | Summarise key results with reference to study objectives                                                                                                                                                     | 9              |
| <b>Limitations</b>       |     |                                                                                                                                                                                                              |                |
| Interpretation           | 20  | Give a cautious overall interpretation of results considering objectives, limitations, multiplicity of analyses, results from similar studies, and other relevant evidence                                   | 9, 11          |
| Generalisability         | 21  | Discuss the generalisability (external validity) of the study results                                                                                                                                        | 9, 10          |
| <b>Other information</b> |     |                                                                                                                                                                                                              |                |
| Funding                  | 22  | Give the source of funding and the role of the funders for the present study and, if applicable, for the original study on which the present article is based                                                | 1              |

\*Give information separately for cases and controls in case-control studies and, if applicable, for exposed and unexposed groups in cohort and cross-sectional studies.

**Note:** An Explanation and Elaboration article discusses each checklist item and gives methodological background and published examples of transparent reporting. The STROBE checklist is best used in conjunction with this article (freely available on the Web sites of PLoS Medicine at <http://www.plosmedicine.org/>, Annals of Internal Medicine at <http://www.annals.org/>, and Epidemiology at <http://www.epidem.com/>). Information on the STROBE Initiative is available at [www.strobe-statement.org](http://www.strobe-statement.org).



# BMJ Open

## Wait a minute? An observational cohort study comparing iron stores in healthy Swedish infants at four months of age after 10 s, 60 s and 180 s umbilical cord clamping

|                                 |                                                                                                                                                                                                                                                                                                                                                                                                                                                                                                                                                                                                                                                                                                                                                                                                                                                                                                                                                                                                                                                                                                                                                                                                                                                                                                                                                                                                                                                                                                                                                               |
|---------------------------------|---------------------------------------------------------------------------------------------------------------------------------------------------------------------------------------------------------------------------------------------------------------------------------------------------------------------------------------------------------------------------------------------------------------------------------------------------------------------------------------------------------------------------------------------------------------------------------------------------------------------------------------------------------------------------------------------------------------------------------------------------------------------------------------------------------------------------------------------------------------------------------------------------------------------------------------------------------------------------------------------------------------------------------------------------------------------------------------------------------------------------------------------------------------------------------------------------------------------------------------------------------------------------------------------------------------------------------------------------------------------------------------------------------------------------------------------------------------------------------------------------------------------------------------------------------------|
| Journal:                        | <i>BMJ Open</i>                                                                                                                                                                                                                                                                                                                                                                                                                                                                                                                                                                                                                                                                                                                                                                                                                                                                                                                                                                                                                                                                                                                                                                                                                                                                                                                                                                                                                                                                                                                                               |
| Manuscript ID                   | bmjopen-2017-017215.R2                                                                                                                                                                                                                                                                                                                                                                                                                                                                                                                                                                                                                                                                                                                                                                                                                                                                                                                                                                                                                                                                                                                                                                                                                                                                                                                                                                                                                                                                                                                                        |
| Article Type:                   | Research                                                                                                                                                                                                                                                                                                                                                                                                                                                                                                                                                                                                                                                                                                                                                                                                                                                                                                                                                                                                                                                                                                                                                                                                                                                                                                                                                                                                                                                                                                                                                      |
| Date Submitted by the Author:   | 01-Aug-2017                                                                                                                                                                                                                                                                                                                                                                                                                                                                                                                                                                                                                                                                                                                                                                                                                                                                                                                                                                                                                                                                                                                                                                                                                                                                                                                                                                                                                                                                                                                                                   |
| Complete List of Authors:       | <p>Askelöf, Ulrica; Dept of Clinical Science, Intervention and Technology , Division of Obstetrics and Gynecology, Karolinska Institutet; The Swedish National Umbilical Cord Blood Bank, Sahlgrenska University Hospital</p> <p>Andersson, Ola; Uppsala Universitet, Womens and Childrens health; Hallands sjukhus Halmstad, Research and Development</p> <p>Domellöf, Magnus; Umea University, Department of Clinical Sciences, Pediatrics</p> <p>Fasth, Anders; Institution of Clinical Sciences, University of Gothenburg; The Swedish National Umbilical Cord Blood Bank, Sahlgrenska University Hospital</p> <p>Hallberg, Boubou; Karolinska Hospital and Karolinska Institutet, Neonatology &amp; CLINTEC</p> <p>Hellström-Westas, Lena; Uppsala Universitet, Women's and Children's Health</p> <p>Pettersson, Karin; Department of Clinical Science, Intervention and Technology, Division of Obstetrics and Gynecology, Karolinska Institutet; The Swedish National Umbilical Cord Blood Bank, Sahlgrenska University Hospital</p> <p>Westgren, Magnus; Department of Clinical Science, Intervention and Technology, Karolinska Institute; The Swedish National Umbilical Cord Blood Bank, Sahlgrenska University Hospital</p> <p>Wiklund, Ingela E ; Department of Clinical Sciences, Danderyd Hospital</p> <p>Götherström, Cecilia; Department of Clinical Science, Intervention and Technology, Division of Obstetrics and Gynecology, Karolinska Institutet; The Swedish National Umbilical Cord Blood Bank, Sahlgrenska University Hospital</p> |
| <b>Primary Subject Heading</b>: | Obstetrics and gynaecology                                                                                                                                                                                                                                                                                                                                                                                                                                                                                                                                                                                                                                                                                                                                                                                                                                                                                                                                                                                                                                                                                                                                                                                                                                                                                                                                                                                                                                                                                                                                    |
| Secondary Subject Heading:      | Paediatrics, Haematology (incl blood transfusion)                                                                                                                                                                                                                                                                                                                                                                                                                                                                                                                                                                                                                                                                                                                                                                                                                                                                                                                                                                                                                                                                                                                                                                                                                                                                                                                                                                                                                                                                                                             |
| Keywords:                       | PAEDIATRICS, UMBILICAL CORD CLAMPING, ALTRUISTIC UMBILICAL CORD BLOOD DONATION, IRON DEFICIENCY, HAEMATOPOIETIC STEM CELL TRANSPLANTATION, Fetal medicine < OBSTETRICS                                                                                                                                                                                                                                                                                                                                                                                                                                                                                                                                                                                                                                                                                                                                                                                                                                                                                                                                                                                                                                                                                                                                                                                                                                                                                                                                                                                        |
|                                 |                                                                                                                                                                                                                                                                                                                                                                                                                                                                                                                                                                                                                                                                                                                                                                                                                                                                                                                                                                                                                                                                                                                                                                                                                                                                                                                                                                                                                                                                                                                                                               |

1  
2  
3  
4  
5  
6  
7  
8  
9  
10  
11  
12  
13  
14  
15  
16  
17  
18  
19  
20  
21  
22  
23  
24  
25  
26  
27  
28  
29  
30  
31  
32  
33  
34  
35  
36  
37  
38  
39  
40  
41  
42  
43  
44  
45  
46  
47  
48  
49  
50  
51  
52  
53  
54  
55  
56  
57  
58  
59  
60

SCHOLARONE™  
Manuscripts

For peer review only

1  
2  
3 **Wait a minute? An observational cohort study comparing iron stores in healthy Swedish infants at**  
4 **four months of age after 10 s, 60 s and 180 s umbilical cord clamping**  
5  
6  
7

8 Ulrica Askelöf, RNM<sup>a,g</sup>, Ola Andersson, MD, PhD<sup>b</sup>, Magnus Domellöf, MD, Prof<sup>c</sup>, Anders Fasth, MD,  
9 Prof<sup>d,g</sup>, Boubou Hallberg, MD, PhD<sup>h</sup>, Lena Hellström-Westas, MD, Prof<sup>b</sup>, Karin Pettersson, MD,  
10 Associate Prof<sup>a,g</sup>, Magnus Westgren, MD, Prof<sup>a,g</sup>, Ingela Wiklund, RNM, Associate Prof<sup>e</sup>, Cecilia  
11 Götherström, Associate Prof<sup>a,f,g</sup>  
12  
13

14 **Affiliations:** <sup>a</sup>Department of Clinical Science, Intervention and Technology, Division of Obstetrics and  
15 Gynecology, Karolinska Institutet, Stockholm, Sweden; <sup>b</sup>Department of Women's and Children's  
16 Health, Uppsala University, Uppsala, Sweden; <sup>c</sup>Department of Clinical Sciences, Pediatrics, Umeå  
17 University, Umeå, Sweden; <sup>d</sup>Institution of Clinical Sciences, University of Gothenburg, Gothenburg,  
18 Sweden; <sup>e</sup>Department of Clinical Sciences, Danderyd Hospital, Stockholm, Sweden and <sup>f</sup>Center for  
19 Hematology and Regenerative Medicine, Karolinska Institutet, Stockholm, Sweden; <sup>g</sup>The Swedish  
20 National Umbilical Cord Blood Bank, Sahlgrenska University Hospital, Gothenburg, Sweden;  
21 <sup>h</sup>Department of Neonatology, CLINTEC, Karolinska Institutet and University Hospital, Stockholm,  
22 Sweden;  
23  
24  
25

26 **Corresponding author:** Associate Prof Cecilia Götherström at Cecilia.gotherstrom@ki.se  
27

28 **Funding Source:** The prospective part of the study was supported by The Swedish Childhood Cancer  
29 Foundation; The regional agreement on medical training and clinical research (ALF) at Karolinska  
30 Institutet and at Sahlgrenska University Hospital and The Dr Åke Olsson Foundation for  
31 Hematological Research, Stockholm. The RCT that provided data for the historical cohorts was  
32 supported by Regional Scientific Council of Halland; the HASNA Foundation, Halmstad; HRH Crown  
33 Princess Lovisa's Foundation for Child Care, Stockholm; and the Framework of Positive Scientific  
34 Culture, Hospital of Halland, Halmstad. The funders were not involved in the study design, data  
35 analysis, or manuscript preparation.  
36  
37  
38

39 **Financial Disclosure:** The authors have no financial relationships relevant to this article to disclose.

40 **Conflict of Interest:** The authors have no conflicts of interest relevant to this article to disclose.

41 **Data Sharing Statement:** There are no other unpublished data available.  
42

43 **Clinical Trial Registration:** Clinicaltrial.gov NCT01245296.  
44

45 **Ethics Approval:** By the Regional Ethical Review Board in Stockholm (2011/2142-31/3) and the  
46 Regional Ethical Review Board at Lund University (41/2008).  
47

48 **Abbreviations:** ANOVA- analysis of variance, CI – confidence interval, CRP – C reactive protein, ID -  
49 iron deficiency, MCV - mean cell volume, NS – non significant, RCT - randomized controlled trial, s –  
50 seconds, SD – standard deviation, UC – umbilical cord, UCB – umbilical cord blood.  
51  
52  
53  
54  
55  
56  
57  
58  
59  
60

## Abstract

**BACKGROUND AND OBJECTIVE:** Umbilical cord blood (UCB) is a valuable stem cell source used for transplantation. Immediate umbilical cord (UC) clamping is normally practiced in UCB collection but delayed UC clamping is increasingly advocated to reduce possible infant anaemia. This policy obstructs collection of UCB for banking. The aim was to investigate an UC clamping time point that enables collection of altruistically donated UCB, without adverse effects for the donating newborn. The objective of the current study was to evaluate iron status at the age of four months in infants who had the UC clamped after 60 seconds (s) in connection with UCB donation and compare the results to immediate and late UC clamping.

**DESIGN:** Prospective observational study with two historical controls.

**SETTING:** A university hospital in Stockholm, Sweden and a county hospital in Halland, Sweden.

**METHOD:** Iron status was assessed at four months in 200 prospectively recruited term infants whose UC was clamped 60s after birth in connection with UCB donation. The results were compared to data from a previously conducted randomized controlled trial including infants subjected to UC clamping at  $\leq 10$  s (n=200) or  $\geq 180$  s (n=200) after delivery.

**RESULTS:** After adjustment for age differences at the time of follow-up, serum ferritin concentrations were 77  $\mu\text{g/L}$ , 103  $\mu\text{g/L}$  and 114  $\mu\text{g/L}$  in the 10s, 60s and 180s groups, respectively. The adjusted ferritin concentration was significantly higher in the 60s group compared to the 10s group ( $P=0.002$ ) while the difference between the 60s and 180s groups was not significant ( $P=0.29$ ).

**CONCLUSION:** In this study of healthy term infants, 60s UC clamping, resulted in higher serum ferritin concentrations at four months compared to 10s UC clamping. The results suggest that delaying the UC clamping for 60s reduces the risk for iron deficiency in connection with altruistic UCB donation.

### Strengths and limitations of the study

- This study compares iron- and blood status at the age of four months in children whose UC were clamped after 60 s due to donation of UCB, with children whose UC were clamped  $\leq 10$  s or  $\geq 180$  s.
- In this study we focus on potential consequences for the UCB donors caused by different UC clamping times, and not the quality of the collected UCB.
- This prospective observational study uses historical controls and results should be interpreted with caution because of potential confounding bias.
- We did not use a non-inferiority approach for this study since we aimed to compare results after 60 s UC clamping with both 10 s- and 180 s UC clamping.

## INTRODUCTION

Umbilical cord blood (UCB) is a valuable stem cell source for the 30-50% of patients that need a hematopoietic stem cell transplantation, but who lack a suitable family or public registry donor [1 2].

More than 35.000 transplantations with UCB have been performed worldwide [1].

The number of hematopoietic stem cells in the UCB unit highly affects the outcome of transplantation [3 4]. A small cell dose in a transplanted unit is directly correlated with a delay in recovery of the immune system and lower incidence of sustained donor engraftment [5 6]. Large cell numbers are essential and closely correlated with the collected volume of UCB. Volume is dependent on the time of umbilical cord (UC) clamping [7]. The earlier the UC is clamped, the more blood is left to collect from the placenta and for this reason immediate UC clamping is normally practiced in UCB collection.

During the last decades, immediate UC clamping has been part of active management of labour with the aim to reduce maternal haemorrhage at birth [8 9]. Hence, the placenta and UCB, have been regarded as waste products following birth. However, immediate UC clamping may deprive infants of up to one third of the total fetoplacental blood volume [10 11] and increase the risk of iron deficiency (ID) in the first 3-6 months of life [12-16]. Iron deficiency is associated with impaired neurodevelopment affecting cognitive, motor, and behavioural skills in young children [17-19]. For this reason the World Health Organization recommends delayed UC clamping for 1-3 minutes after birth [20].

We hypothesized that if the UC is clamped at 60 seconds (s) after birth, a sufficient amount of blood will have passed from the placenta to the infant to reduce the risk of ID and anaemia while still allowing collection of UCB for banking [21]. The objective of the current study was to evaluate iron status and complete blood counts at the age of four months in infants who had the UC clamped after 60s in connection with UCB donation and compare the results to immediate ( $\leq 10$ s) and late ( $\geq 180$ s) UC clamping. In this study we focused on potential consequences for the donors only.

## MATERIALS AND METHODS

We performed an observational cohort study using one prospective clinical cohort and data from a previously performed randomized controlled trial (RCT)[13]. The prospectively recruited infants were born at Karolinska University Hospital Huddinge, Sweden between April 2012 and May 2015, to parents who agreed to donate UCB to the Swedish National Umbilical Cord Blood Bank, a public bank without profit interest. To enable collection of UCB, the UC was clamped after  $60 \pm 10$ s. The historical cohorts consisted of data from infants who were randomized to immediate (within 10s after birth) or late (after 180s) UC clamping, respectively, in a trial conducted by three of the co-authors at the Hospital of Halland in Halmstad, Sweden between April 2008 and September 2009 [13].

### Outcome measures

The primary outcome variable was ferritin as a measure of iron stores, at the age of four months and secondary outcomes included haemoglobin, transferrin saturation, soluble transferrin receptors, mean cell volume (MCV) as well as ID (defined as  $\geq 2$  iron indicators outside reference range with the following cut-off values: ferritin  $< 20 \mu\text{g/L}$ , [22] MCV  $< 73 \text{ fL}$ , [22] transferrin saturation  $< 10\%$  [23] and transferrin receptor  $> 7 \text{ mg/L}$  [13]). Since ferritin is an acute phase reactant, C reactive protein (CRP) was analysed in order to exclude falsely elevated ferritin measurements. The infant's dietary habits at four months were also considered as well as the relevance of infant sex for iron and blood status at that age.

### Sample size

A formal power calculation was not performed for the current study but the sample size was based on the group size in the original RCT by Andersson *et al.* 2011 (the historical cohorts). The power calculation by Andersson *et al.* showed that a group size of 200 would enable detection of a 29% difference in geometric mean serum ferritin between 10s and 180s UC clamping with a power of 80% and a significance level of 0.05, assuming a mean serum ferritin concentration of  $110 \mu\text{g/L}$  in the 180s-group while allowing an attrition of 25% [13]. Based on the results from Andersson *et al.*,

1  
2  
3 demonstrating a 45% difference in ferritin concentration between 10s and 180s UC clamping [13], we  
4  
5 decided to include 200 children also in the prospective group.  
6

### 7 **Study population and inclusion criteria**

8  
9 The same inclusion criteria applied for the prospective and historical cohorts: healthy mother,  
10  
11 normal, singleton pregnancy, gestational age 37+0 to 41+6 weeks and planned vaginal delivery with  
12  
13 cephalic presentation [13]. The mother also had to understand Swedish well enough to consent  
14  
15 participation in the study. In the prospectively recruited cohort, parents also had to agree to altruistic  
16  
17 donation of UCB, and to the modified UC clamping strategy. Exclusion criteria were also the same in  
18  
19 the three groups: smoking mother, serious congenital malformations, syndromes, or other congenial  
20  
21 diseases that could affect the outcome measures. For this study, we only included data from the RCT  
22  
23 that were handled according to per protocol, as compared to the analysis by intention to treat in the  
24  
25 original RCT [13]. Moreover, like the RCT, we only included children with CRP<10 in the analysis. All  
26  
27 parents donating UCB at Karolinska University Hospital Huddinge that met the inclusion criteria were  
28  
29 offered to participate in the study upon arrival at the delivery unit. Midwives were instructed to  
30  
31 clamp the UC 60s after birth in deliveries where parents had consented to participate in the study.  
32  
33 Staff in charge of collection of UCB measured the exact timing of UC clamping using a digital timer.  
34  
35 Only children whose UC were clamped at 60 ±10s were included in the study. Oral and written  
36  
37 informed consent was obtained from one or both of the parents. The study was approved by the  
38  
39 regional ethical review board in Stockholm (2011/2142-31/3) and the RCT was approved by the  
40  
41 regional ethical review board at Lund University (41/2008).  
42  
43  
44  
45

### 46 **Data collection and blood samples**

47  
48 Midwives were instructed to hold the new-born baby below the uterine level for the first 30s before  
49  
50 placing the infant on the mother's abdomen, in accordance with the study by Andersson *et al.* 2011  
51  
52 [13]. The UC clamping technique used in the prospectively recruited cohort was similar to the  
53  
54 historical groups except for the timing. Venous blood samples were analysed at birth from the UC, at  
55  
56 two to three days of age in connection with metabolic screening and at four months (±21 days) at a  
57  
58  
59  
60

1  
2  
3 scheduled follow-up visit. At birth and at four months, serum ferritin, haemoglobin, haematocrit,  
4  
5 MCV, reticulocyte count, transferrin saturation, transferrin receptor and CRP were analysed and at  
6  
7 two to three days of age we analysed haemoglobin, haematocrit and bilirubin. EDTA tubes were used  
8  
9 for blood count and serum separator tubes for iron status, bilirubin and CRP (Microvette, Sarstedt AG  
10  
11 & Co, Nümbrecht, Germany). Blood status was analysed using equal methods and equipment in both  
12  
13 the laboratory at Karolinska University Hospital (Sysmex XE5000, Sysmex, Kobe, Japan) and at the  
14  
15 Hospital of Halland (Sysmex XE2100, Sysmex, Kobe, Japan). Analysis of iron status and CRP could be  
16  
17 performed at the same laboratory as in the RCT [13], and therefore the blood samples collected at  
18  
19 Karolinska University Hospital were centrifuged and the serum kept at -70 degrees Celsius before  
20  
21 sent for analysis at the Clinical Chemistry Laboratory at the Hospital of Halland. The samples were  
22  
23 then thawed and analysed using a Cobas 6000 (Roche Diagnostics, Basel, Switzerland), the same  
24  
25 method as in the RCT [13].  
26  
27

### 28 **Statistical analysis**

29  
30 Analyses on the two historical cohorts, 10s and 180s, were calculated only on infants receiving  
31  
32 intervention per protocol in order to obtain clearly defined groups according to time of UC clamping.  
33  
34 Baseline characteristics were compared across groups using analysis of variance (ANOVA). Means of  
35  
36 outcome measures in the three cohorts were compared using the Bonferroni method. We also  
37  
38 performed pairwise comparisons (60s vs 10s and 60s vs 180s) using Student's t-test for variables with  
39  
40 normal distribution that were statistically significant in the Bonferroni analyses. Ferritin  
41  
42 concentration was log<sub>10</sub> transformed for analysis because of skewed distribution and the results  
43  
44 were presented as geometric means. Categorical variables were compared between groups using  
45  
46 Fisher's Exact test for pairwise comparisons. Adjusted group means were compared using ANOVA  
47  
48 and a binary logistic regression model was used to adjust for sex and age in the evaluation of ID at  
49  
50 four months. A P-value less than 0.05 were considered significant. No imputation of missing data was  
51  
52 performed. Loss to follow-up was registered, but not examined further. IBM SPSS for Windows,  
53  
54 version 22 was used for the analyses.  
55  
56  
57  
58  
59  
60



## RESULTS

Of the 200 prospectively recruited infants, 191 were included in the analysis as compared to 166 in the 10s and 168 in the 180s groups. Infants lost to follow up or excluded due to not fulfilling inclusion criteria are shown in Fig 1.

### Baseline data

There were no significant differences in the 60s group as compared to the 10s and 180s groups with regard to maternal or neonatal characteristics. The 10s group had higher UC haemoglobin (163 vs 153 g/L,  $P<0.001$ ) and higher UC haematocrit (48.7 vs 47.0%,  $P=0.005$ ) than the 60s group. There were no significant differences between the 60s and the 180s groups (Table 1).

### Two to three day-follow-up

At two to three days, blood samples were obtained from 140 infants in the 10s group, 107 in the 60s group, and 141 in the 180s group (Figure 1). The prevalence of anaemia was higher in the 10s compared to the 60s and 180s groups (9 (6.4%), 2 (1.9%) and 2 (1.4%)) respectively ( $P=0.04$ ).

Haemoglobin was lower in the 10s and 60s groups compared to the 180s group; 175, 180 and 189 g/L respectively ( $P=0.001$  for 60s vs 180s). Bilirubin did not differ between the groups. Anaemic children were referred for further diagnostics but none needed treatment.

### Primary outcome

In total 468 (78%) infants had follow up at four months (children excluded or lost to follow up are shown in Figure 1). In the 60s group, the infants ( $n=147$ ) were four days older than the historical groups from the RCT ( $126\pm 7$  days vs  $122\pm 6$  days,  $P<0.001$ ). The geometric mean ferritin levels were 80, 96 and 117  $\mu\text{g/L}$  respectively in the 10s, 60s and 180s groups ( $P=0.052$  for 10s vs 60s;  $P=0.02$  for 60s vs 180s) (Table 2). After adjustment for the age difference, the geometric means were 77, 103 and 114  $\mu\text{g/L}$  respectively ( $P=0.002$  for 10s vs 60s;  $P=0.29$  for 60s vs 180s) (Table 3).

### Secondary outcomes

All secondary outcome variables are shown in Table 2. Haemoglobin levels at four months were higher in the 60s group compared to 10s and 180s, but the difference did not remain in the age

1  
2  
3 adjusted model (Table 3). There were no statistically significant differences in the prevalence of  
4  
5 anaemia in the 60s group as compared to the other two groups (Table 4). After adjustment for age at  
6  
7 the time of follow-up, there were no differences between the 10s and 60s groups in haematocrit,  
8  
9 MCV, reticulocyte count, transferrin receptor or transferrin saturation. The 60s group had  
10  
11 significantly lower adjusted MCV and higher adjusted transferrin receptor compared to the 180s  
12  
13 group, but there were no differences in haematocrit, reticulocyte count or transferrin saturation  
14  
15 (Table 3). The prevalence of ID was 8 (5.2%), 7 (4.8%) and 1 (0.7%) respectively in the 10s, 60s and  
16  
17 180s groups ( $P>0.99$  for 10s vs 60s and  $P=0.04$  for 60s vs 180s) (Table 4). After statistical adjustments  
18  
19 for sex and age at the time of follow-up, the prevalence of ID did not differ between the 60s group  
20  
21 and the two other groups. The proportion of infants that were exclusively breast fed at four months  
22  
23 did not differ between the groups (79 (52%), 92 (58%) and 89 (56%) respectively in the 10s, 60s and  
24  
25 180s groups. The impact of exclusive breast feeding on ferritin concentration and ID were further  
26  
27 assessed in an adjusted model but no correlation was found (data not shown).  
28  
29

### 30 31 **Sex differences**

32  
33 Iron and blood status at four months were further assessed by analysing differences according to  
34  
35 infant sex. When data from the three cohorts were analysed together, geometric mean ferritin was  
36  
37 lower in boys than in girls and ID was more prevalent amongst boys (Fig 2A and 2B). Haemoglobin  
38  
39 concentrations did not differ significantly between boys and girls and neither did the prevalence of  
40  
41 anaemia (data not shown).  
42  
43

### 44 45 **DISCUSSION**

46  
47 We compared infants' iron and blood status at the age of four months after three different UC  
48  
49 clamping time intervals (60s versus  $\leq 10$ s, and  $\geq 180$ s, respectively). Previous studies have compared  
50  
51 immediate and late UC clamping but the definition of "late" in these studies varies from 60s to 180s  
52  
53 or after birth of the placenta [12 14 15]. The current study evaluates an intermediate UC clamping  
54  
55 strategy that can be used in connection with altruistic donation of UCB for clinical banking. When  
56  
57 asking parents to donate their child's UCB for the potential good of others, it is essential to inform of  
58  
59

1  
2  
3 possible consequences for the child. We demonstrated that after adjustment for age difference at  
4  
5 the time of follow-up, there were no statistically significant differences in ferritin concentration  
6  
7 between the 60s and 180s groups but the 60s group had significantly higher ferritin concentrations  
8  
9 compared to 10s. The main reason for the effect of age on ferritin during infancy is rapid growth  
10  
11 which leads to a rapidly expanding blood volume and depletion of iron stores [16].  
12

13  
14 Results from the present study are in accordance with a Brazilian RCT that demonstrated higher  
15  
16 ferritin concentration at the age of three months in children whose UC were clamped after 60s  
17  
18 compared to immediate UC clamping [24]. However, our findings are in contrast to a study by  
19  
20 Cernadas *et al.*, who reported no differences in ferritin six months after birth comparing 15s and 60s  
21  
22 UC clamping. The difference in ferritin between the 60s and 180s groups were not presented [25].  
23  
24 The present study indicates that a 60s delay before UC clamping results in a mean serum ferritin at 4  
25  
26 months of age corresponding to 90% of the mean ferritin after 180s UC clamping.  
27

28  
29 In the current study, children in the 60s group had the lowest haemoglobin of all three groups at  
30  
31 birth (10s 163 g/L, 60s 153 g/L, 180s 158 g/L) but at four months, there were no longer any  
32  
33 differences between the groups in our adjusted model. The original RCT as well as a Cochrane report  
34  
35 found higher concentrations of haemoglobin after immediate than late UC clamping at birth [13 15].  
36  
37 As speculated in a previous publication, this difference may not reflect true difference in  
38  
39 haemoglobin but could be a result of trans endothelial plasma leakage in the UC after UC clamping  
40  
41 [13].  
42

43  
44 The prevalence of ID was higher in the 10s and 60s groups compared to the 180s group. However,  
45  
46 when adjusting for sex and age at the time of follow-up, there were no longer any statistically  
47  
48 significant differences between the three groups. In accordance with previous studies on ID in  
49  
50 infancy, we found that at four months, boys had significantly lower geometric mean ferritin and  
51  
52 more often ID than girls [26 27]. Nevertheless, the aim of the study was not to compare differences  
53  
54 according to sex, and the groups were therefor too small to draw any reliable conclusions of sex and  
55  
56 ID. It has been suggested that the differences in iron status between the two sexes may be hormone-  
57  
58  
59  
60

1  
2  
3 related but it is also influenced by genetic factors, which may differ in populations with different  
4  
5 ethnicity [27]. Also, when considering the generalisability of this study, readers should bear in mind  
6  
7 that all children were placed below the uterine level for 30s directly after birth. This may be in  
8  
9 contrast to the practice in other delivery settings, where the children are often placed directly on the  
10  
11 woman's abdomen, which may affect the speed of the placental transfusion.  
12

### 13 **Limitations of the study**

14  
15 A limitation of this study is that we have no record of the parents' ethnic or socio-economic  
16  
17 background, and we were therefore unable to draw any conclusions on possible impact of these  
18  
19 factors. When comparing different interventions, RCTs are regarded as the golden standard.  
20  
21 However, randomization into 10s UC clamping for this study was considered unethical since there is  
22  
23 evidence that children benefit from prolonged placental transfusion for at least 60s, and the clinical  
24  
25 routine in Sweden is to wait 180s before UC clamping in normal deliveries. We used the historical  
26  
27 cohorts from the RCT in Halmstad, Sweden as controls in this study. The prospectively recruited  
28  
29 cohort (60s) is from a large birth clinic in Stockholm, Sweden while the controls are from a smaller  
30  
31 town where the participants were recruited two to five years earlier. Although the inclusion criteria  
32  
33 were the same and pregnant mothers in Sweden follow the same well-controlled antenatal program  
34  
35 and the baseline data showed no significant differences in maternal or infant characteristics, it is  
36  
37 difficult to know if the study populations are homogenous. We did not use a non-inferiority approach  
38  
39 for this study since we aimed to compare results after 60s UC clamping with 10s and 180s. Nor did we  
40  
41 perform a power calculation when designing the study, but included an equally large group as the  
42  
43 two historical groups. This is a weakness which, should be taken into consideration. We have taken  
44  
45 measures to avoid systematic biases caused by differences in laboratory routines between the two  
46  
47 hospitals by using the same laboratory for analysing the iron status variables as well as CRP.  
48  
49  
50 Collection of UCB for transplantation is a growing and life-saving practice. Tens of thousands UCB  
51  
52 units are altruistically donated and stored for public use each year, and as a result new-borns are  
53  
54 exposed to limited UC clamping time. The idea that UCB left in the placenta after birth is a mere  
55  
56  
57  
58  
59  
60

1  
2  
3 waste that is thrown away if not collected is obsolete. Optimizing UC clamping time and investigating  
4  
5 the clinical significance to minimize risks for the infant while still enabling collection of UCB for  
6  
7 transplantation is a great, but necessary, challenge. A study evaluating volume and TNC in UCB units  
8  
9 collected at the Swedish National Umbilical Cord Blood Bank showed that 37 % of units collected  
10  
11 after 60s UC clamping met the banking criteria compared to 47 % after immediate UC clamping [21].  
12

### 13 14 15 **CONCLUSION**

16  
17 In this observational study, significantly more children in the 10s UC clamping group had low iron  
18  
19 stores at four months compared to children in the 60s and 180s UC clamping groups. After  
20  
21 adjustment for age and sex, there were no statistically significant differences in ferritin concentration  
22  
23 between 60 and 180s UC clamping. 60s UC clamping is therefore preferable to immediate UC  
24  
25 clamping and enables collection of UCB for transplantation since it reduces the risk for low iron  
26  
27 stores. Delaying UC clamping may be more important in boys than in girls to avoid ID in early  
28  
29 childhood. Larger studies with long term follow-up is needed to establish the clinical relevance of  
30  
31 different UC clamping strategies.  
32  
33

### 34 35 **CONTRIBUTORS**

36  
37 Dr C. Götherström conceptualized and designed the study, analyzed data, critically revised and  
38  
39 approved the final manuscript as submitted. Mrs U. Askelöf conceptualized and designed the study,  
40  
41 carried out all data collection in the prospective cohort, carried out all analyses, drafted the initial  
42  
43 manuscript, and approved the final manuscript as submitted. Dr O. Andersson designed the data  
44  
45 collection instruments, contributed to the study design and provided data for the historical cohorts.  
46  
47 He also carried out the initial analyses, critically reviewed and revised the manuscript, and approved  
48  
49 the final manuscript as submitted. Profs M. Domellöf, A. Fasth, L. Hellström-Westas, M. Westgren,  
50  
51 Associate Profs K. Pettersson and I. Wiklund and Dr B. Hallberg participated in the study design,  
52  
53 reviewed and revised the manuscript and approved the final manuscript as submitted.  
54  
55  
56  
57  
58  
59  
60

**ACKNOWLEDGEMENTS**

The authors thank Harjeet Kaur Malhi, Astrid Börjesson, Malin Hjertqvist and Camilla Halzius, the staff at the delivery ward at Karolinska University Hospital Huddinge and all mothers and infants who participated in the study. This study was supported by grants from The Swedish Childhood Cancer Foundation, The regional agreement on medical training and clinical research (ALF) in Stockholm and Gothenburg and The Dr Åke Olsson Foundation for Hematological Research, Stockholm.

For peer review only

**TABLE 1.** Baseline characteristics of mothers and infants according to time for umbilical cord clamping

|                                            | Umbilical cord clamping time |              |                    | P       |
|--------------------------------------------|------------------------------|--------------|--------------------|---------|
|                                            | 10s<br>n=166 (HC)            | 60s<br>n=191 | 180s<br>n=168 (HC) |         |
| <b>Maternal characteristics</b>            |                              |              |                    |         |
| Age (years)                                | 31.7(4.2)                    | 30.7(4.7)    | 30.8(4.9)          | NS      |
| Parity (including study child)             | 1.81(0.87)                   | 1.86(0.76)   | 1.76(0.74)         | NS      |
| Weight at first antenatal visit (kg)       | 66.4(12.0)                   | 67.3(11.5)   | 67.3(12.1)         | NS      |
| Body mass index                            | 23.6(3.8)                    | 24.5(3.9)    | 23.9(3.6)          | NS      |
| Haemoglobin at first antenatal visit (g/L) | 128(9)                       | 128(10)      | 128(11)            | NS      |
| No (%) of vaginal deliveries:              |                              |              |                    |         |
| Non-instrumental                           | 157(95)                      | 184(96)      | 157(94)            | NS      |
| Vacuum extraction                          | 8(5)                         | 7(4)         | 11(7)              | NS      |
| Forceps                                    | 1(0.6)                       | 0(0)         | 0(0)               | NS      |
| <b>Infant characteristics</b>              |                              |              |                    |         |
| Gestational age (weeks)                    | 40.0(1.1)                    | 40.0(1.0)    | 40.0(1.1)          | NS      |
| No (%) of males                            | 83(50)                       | 98(51)       | 73(43)             | NS      |
| Birth weight (g)                           | 3523(483)                    | 3603(454)    | 3633(464)          | NS      |
| Birth length (cm)                          | 50.7(1.9)                    | 50.6(1.8)    | 50.9(1.9)          | NS      |
| Head circumference (cm)                    | 34.7(1.3)                    | 35.1(1.3)    | 35.0(1.4)          | NS      |
| Umbilical cord haemoglobin (g/L)           | 163(15)                      | 153(20)      | 158(18)            | <0.001* |
| Umbilical cord haematocrit (%)             | 48.7(4.3)                    | 47.0(5.5)    | 47.1(5.0)          | 0.005** |

Values are means (SD) unless stated otherwise. P<0.05 was considered significant.

NS=non-significant; HC= Historical cohort.

\*Comparison of 10s and 60s. For 180s and 60s, P=0.063.

\*\*Comparison of 10s and 60s. For 180s and 60s, P>0.99.

**TABLE 2.** Outcome measures at the age of four months in infants whose umbilical cord were clamped after 10s, 60s or 180s

|                                           | Umbilical cord clamping time |                |                    | 60s vs 10s                  |        | 60s vs 180s                 |        |
|-------------------------------------------|------------------------------|----------------|--------------------|-----------------------------|--------|-----------------------------|--------|
|                                           | 10s<br>n=153 (HC)            | 60s<br>n=147   | 180s<br>n=148 (HC) | Mean difference<br>(95% CI) | P      | Mean difference<br>(95% CI) | P      |
| Infant age (days)                         | 122 (6)                      | 126 (7)        | 122 (6)            | 5 (3 to 6)                  | <0.001 | 4 (3 to 6)                  | <0.001 |
| <b>Main outcome measures</b>              |                              |                |                    |                             |        |                             |        |
| Geometric mean (range)<br>ferritin (µg/L) | 80 (33 to 191)               | 96 (44 to 208) | 117 (58 to 232)    | 0.83 (0.69 to 1.45)*        | 0.052  | 1.21 (1.03 to 1.44)*        | 0.02   |
| Haemoglobin (g/L)                         | 113 (7)                      | 115 (8)        | 113 (8)            | 2 (0 to 4)                  | 0.047  | 2 (0 to 4)                  | 0.03   |
| <b>Blood count</b>                        |                              |                |                    |                             |        |                             |        |
| Haematocrit (%)                           | 33.0 (2.0)                   | 33.3 (2.2)     | 32.7 (2.1)         | 0.3 (-0.2 to 0.8)           | 0.19   | 1 (0 to 1)                  | 0.02   |
| Mean cell volume (fL)                     | 77.9 (3.1)                   | 77.7 (3.7)     | 79.2 (3.0)         | -0.2 (-1 to 0.6)            | 0.67   | -1.5 (-2.3 to -0.7)         | <0.001 |
| Reticulocyte count (x10 <sup>9</sup> /L)  | 37 (11)                      | 36 (11)        | 40 (11)            | -1 (-4 to 1)                | 0.39   | -4 (-6 to -1)               | 0.01   |
| <b>Iron status</b>                        |                              |                |                    |                             |        |                             |        |
| Transferrin receptor (mg/L)               | 4.00 (0.80)                  | 4.07 (0.92)    | 3.71 (0.69)        | 0.07 (-0.13 to 0.26)        | 0.51   | 0.35 (0.17 to 0.54)         | <0.001 |
| Transferrin saturation (%)                | 16 (6)                       | 16 (8)         | 18 (6)             | 1 (-1 to 2)                 | 0.40   | -2 (-3 to 0)                | 0.03   |

Values are means (SD) unless stated otherwise. HC= Historical cohort.

\*Geometric mean ratio (95% CI for geometric mean).

Successful analyses in the 60s and 180s groups: haemoglobin (n=140, 144), haematocrit, mean cell volume, reticulocyte count (n=135, 144), ferritin (n=147, 148), transferrin receptor (n=147, 148), transferrin saturation (n=145, 148).



**TABLE 3.** Outcome measures at the age of four months adjusted for infant age

|                                           | Umbilical cord clamping time<br>Adjusted means (95% CI) |                     |                     | P<br>60s vs 10s | P<br>60s vs 180s |
|-------------------------------------------|---------------------------------------------------------|---------------------|---------------------|-----------------|------------------|
|                                           | 10s<br>n=152 (HC)                                       | 60s<br>n=147        | 180s<br>n=148 (HC)  |                 |                  |
| <b>Main outcome measures</b>              |                                                         |                     |                     |                 |                  |
| Geometric mean (range)<br>ferritin (µg/L) | 77 (68 to 87)                                           | 103 (90 to 117)     | 114 (100 to 129)    | 0.002           | 0.29             |
| Haemoglobin (g/L)                         | 113 (112 to 115)                                        | 114 (113 to 116)    | 113 (112 to 114)    | 0.30            | 0.17             |
| <b>Blood count</b>                        |                                                         |                     |                     |                 |                  |
| Haematocrit (%)                           | 33.1 (32.7 to 33.4)                                     | 33.1 (32.8 to 33.5) | 32.7 (32.4 to 33.1) | 0.30            | 0.12             |
| Mean cell volume (fL)                     | 77.8 (77.3 to 78.3)                                     | 77.9 (77.3 to 78.4) | 79.1 (78.6 to 79.6) | 0.30            | 0.003            |
| Reticulocyte count (x10 <sup>9</sup> /L)  | 36.9 (35.2 to 38.7)                                     | 37.0 (35.0 to 38.9) | 39.4 (37.6 to 41.2) | 0.99            | 0.07             |
| <b>Iron status</b>                        |                                                         |                     |                     |                 |                  |
| Transferrin receptor (mg/L)               | 4.01 (3.87 to 4.14)                                     | 4.05 (3.92 to 4.19) | 3.72 (3.59 to 3.85) | 0.62            | 0.001            |
| Transferrin saturation (%)                | 15.7 (14.7 to 16.7)                                     | 16.6 (15.5 to 17.7) | 18.1 (17 to 19.2)   | 0.25            | 0.06             |

Values are means (95% CI) adjusted for infant age (days from birth) unless stated otherwise.

HC= Historical cohort. Successful analyses for the 60s group were: ferritin (n=147), haemoglobin (n=140), haematocrit, mean cell volume, reticulocyte count (n=135), transferrin receptor, and transferrin saturation (n=145). For the 180s group; blood status (n=144).

**TABLE 4.** Infants with iron status indicators outside reference limits at the age of 4 months according to umbilical cord clamping time

|                              | Umbilical cord clamping time |              |                    | P<br>60s vs 10s | P<br>60s vs 180s |
|------------------------------|------------------------------|--------------|--------------------|-----------------|------------------|
|                              | 10s<br>n=153 (HC)            | 60s<br>n=147 | 180s<br>n=148 (HC) |                 |                  |
| Ferritin <20 µg/L            | 11 (7.2)                     | 4 (2.7)      | 0 (0)              | 0.11            | 0.06             |
| Anaemia (Hb<105 g/L)         | 20 (13.1)                    | 16 (11.4)    | 20 (13.9)          | 0.72            | 0.60             |
| Mean cell volume <73 fL      | 8 (5.2)                      | 14 (10.4)    | 3 (2.1)            | 0.12            | 0.01             |
| Transferrin saturation <10%  | 22 (14.4)                    | 15 (10.3)    | 8 (5.4)            | 0.38            | 0.13             |
| Transferrin receptor >7 mg/L | 0 (0)                        | 2 (1.4)      | 0 (0)              | 0.24            | 0.25             |
| Iron deficiency*             | 8 (5.2)                      | 7 (4.8)      | 1 (0.7)            | 1.00            | 0.04             |

Values are unadjusted numbers (%). HC= Historical cohort.

Numbers of successful analyses: mean cell volume (n=153, 135, 144), transferrin saturation (n=153, 145, 148), anaemia (n=153, 140, 144).

## REFERENCES

1. Bone Marrow Donors Worldwide. Published 2015. Secondary Bone Marrow Donors Worldwide. Published 2015. 2015. <http://www.bmdw.org/>.
2. Brunstein C, Setubal D, J W. Expanding the role of umbilical cord blood transplantation. *Br J Haematol* 2007;**137**(1):20-35 doi: 10.1111/j.1365-2141.2007.06521.x[published Online First: Epub Date]].
3. Copelan EA. Hematopoietic stem-cell transplantation. *The New England journal of medicine* 2006;**354**(17):1813-26 doi: 10.1056/NEJMra052638[published Online First: Epub Date]].
4. Migliaccio AR, Adamson JW, Stevens CE, et al. Cell dose and speed of engraftment in placental/umbilical cord blood transplantation: graft progenitor cell content is a better predictor than nucleated cell quantity. *Blood* 2000;**96**(8):2717-22
5. Barker JN, Byam CE, Kernan NA, et al. Availability of cord blood extends allogeneic hematopoietic stem cell transplant access to racial and ethnic minorities. *Biol Blood Marrow Transplant* 2010;**16**(11):1541-8 doi: 10.1016/j.bbmt.2010.08.011[published Online First: Epub Date]].
6. Gluckman E, Koegler G, Rocha V. Human leukocyte antigen matching in cord blood transplantation. *Semin Hematol* 2005;**42**(2):85-90 doi: 10.1053/j.seminhematol.2005.01.006[published Online First: Epub Date]].
7. Allan DS, Scrivens N, Lawless T, et al. Delayed clamping of the umbilical cord after delivery and implications for public cord blood banking. *Transfusion* 2016;**56**(3):662-5 doi: 10.1111/trf.13424[published Online First: Epub Date]].
8. Spencer PM. Controlled cord traction in management of the third stage of labour. *BMJ (Clinical research ed)* 1962;**1**:1728-32
9. Winter C, Macfarlane A, Deneux-Tharoux C, et al. Variations in policies for management of the third stage of labour and the immediate management of postpartum haemorrhage in Europe. *BJOG : an international journal of obstetrics and gynaecology* 2007;**114**(7):845-54 doi: 10.1111/j.1471-0528.2007.01377.x[published Online First: Epub Date]].
10. Yao AC, Moinian M, Lind J. Distribution of blood between infant and placenta after birth. *Lancet* 1969;**2**(7626):871-3
11. Mercer JS, Erickson-Owens DA. Rethinking placental transfusion and cord clamping issues. *J Perinat Neonatal Nurs* 2012;**26**(3):202-17; quiz 18-9 doi: 10.1097/JPN.0b013e31825d2d9a[published Online First: Epub Date]].
12. Hutton EK, Hassan ES. Late vs early clamping of the umbilical cord in full-term neonates: systematic review and meta-analysis of controlled trials. *JAMA : the journal of the American Medical Association* 2007;**297**(11):1241-52 doi: 10.1001/jama.297.11.1241[published Online First: Epub Date]].
13. Andersson O, Hellström-Westas L, Andersson D, et al. Effect of delayed versus early umbilical cord clamping on neonatal outcomes and iron status at 4 months: a randomised controlled trial. *BMJ (Clinical research ed)* 2011;**343**:d7157 doi: 10.1136/bmj.d7157[published Online First: Epub Date]].
14. Chaparro CM, Neufeld LM, Tena Alavez G, et al. Effect of timing of umbilical cord clamping on iron status in Mexican infants: a randomised controlled trial. *Lancet* 2006;**367**(9527):1997-2004 doi: 10.1016/s0140-6736(06)68889-2[published Online First: Epub Date]].
15. McDonald S, Middleton P, Dowswell T, et al. Effect of timing of umbilical cord clamping of term infants on maternal and neonatal outcomes. *Evid Based Child Health* 2014;**9**(2):303-97 doi: 10.1002/ebch.1971[published Online First: Epub Date]].
16. Oski F. Iron deficiency in infancy and childhood. *The New England journal of medicine* 1993;**329**(3)
17. Lozoff B, Beard J, Connor J, et al. Long-lasting neural and behavioral effects of iron deficiency in infancy. *Nutrition reviews* 2006;**64**(5 Pt 2):S34-43; discussion S72-91
18. Andersson O, Lindquist B, Lindgren M, et al. Effect of Delayed Cord Clamping on Neurodevelopment at 4 Years of Age: A Randomized Clinical Trial. *JAMA pediatrics*

- 2015;**169**(7):631-8 doi: 10.1001/jamapediatrics.2015.0358[published Online First: Epub Date]].
19. Berglund S, Westrup B, Hägglöf B, et al. Effects of iron supplementation of LBW infants on cognition and behavior at 3 years. *Pediatrics* 2013;**131**(1):47-55 doi: 10.1542/peds.2012-0989[published Online First: Epub Date]].
20. World Health Organization. Delayed clamping of the umbilical cord to reduce infant anaemia., 2014.
21. Frandberg S, Konar J, Rydberg L, Fasth A, Holgersson J. High quality cord blood banking is feasible with delayed clamping practices. The eight-year experience and current status of the national Swedish Cord Blood Bank. *Cell and tissue banking* 2016 doi: 10.1007/s10561-016-9565-6[published Online First: Epub Date]].
22. Domellöf M, Dewey K, Lönnerdal B, et al. The diagnostic criteria for iron deficiency in infants should be re-evaluated. *The Journal of nutrition* 2002;**132**(12)
23. Saarinen U, Siimes M. Developmental changes in serum iron, total iron-binding capacity, and transferrin saturation in infancy. *The Journal of Pediatrics* 1977;**91**(6):875-77
24. Venâncio SI, Levy RB, Saldiva SR, et al. [Effects of delayed cord clamping on hemoglobin and ferritin levels in infants at three months of age]. *Cad Saude Publica* 2008;**24**(2):323-31
25. Ceriani Cernadas JM, Carroli G, Pellegrini L, et al. [The effect of early and delayed umbilical cord clamping on ferritin levels in term infants at six months of life: a randomized, controlled trial]. *Arch Argent Pediatr* 2010;**108**(3):201-8 doi: 10.1590/s0325-00752010000300005[published Online First: Epub Date]].
26. Georgieff MK. Long-term brain and behavioral consequences of early iron deficiency. *Nutr Rev* 2011;**69 Suppl 1**:S43-8 doi: 10.1111/j.1753-4887.2011.00432.x[published Online First: Epub Date]].
27. Domellöf M, Lönnerdal B, Dewey K, et al. Sex differences in iron status during infancy. *Pediatrics* 2002;**110**(3):545-52

## FIGURE LEGENDS

**FIGURE 1.** Flow chart of the study populations.

**FIGURE 2.** Differences in infants' iron status at the age of 4 months according to sex in three groups divided according to umbilical cord clamping time. **A:** Geometric mean ferritin according to sex and time for umbilical cord clamping, **B:** Proportion of children with iron deficiency according to time for umbilical cord clamping and sex.

1  
2  
3  
4  
5  
6  
7  
8  
9  
10  
11  
12  
13  
14  
15  
16  
17  
18  
19  
20  
21  
22  
23  
24  
25  
26  
27  
28  
29  
30  
31  
32  
33  
34  
35  
36  
37  
38  
39  
40  
41  
42  
43  
44  
45  
46  
47  
48  
49  
50  
51  
52  
53  
54  
55  
56  
57  
58  
59  
60

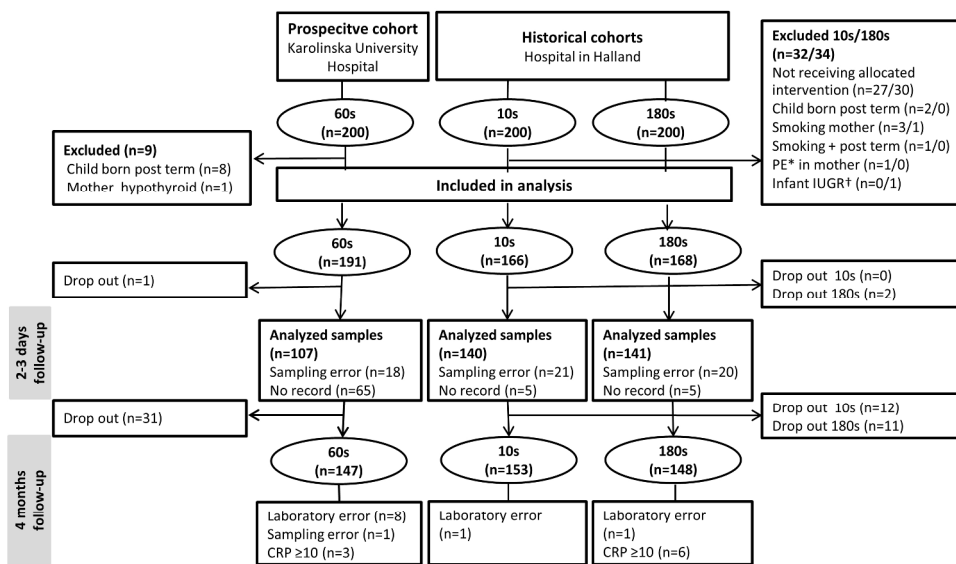

\*Pre-eclampsia  
†Intrauterine growth retardation

FIGURE 1. Flow chart of the study populations.

254x190mm (300 x 300 DPI)

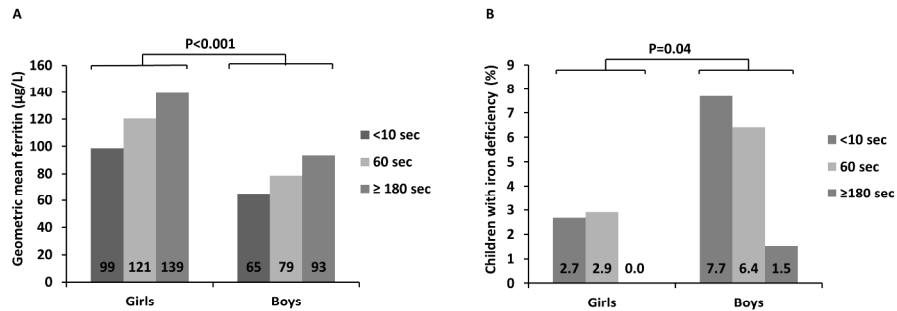

FIGURE 2. Differences in infants' iron status at the age of 4 months according to sex in three groups divided according to umbilical cord clamping time. A: Geometric mean ferritin according to sex and time for umbilical cord clamping, B: Proportion of children with iron deficiency according to time for umbilical cord clamping and sex.

254x190mm (300 x 300 DPI)

STROBE 2007 (v4) Statement—Checklist of items that should be included in reports of *cohort studies*

| Section/Topic                | Item # | Recommendation                                                                                                                                                                       | Reported on page # |
|------------------------------|--------|--------------------------------------------------------------------------------------------------------------------------------------------------------------------------------------|--------------------|
| Title and abstract           | 1      | (a) Indicate the study's design with a commonly used term in the title or the abstract                                                                                               | 1, 2               |
|                              |        | (b) Provide in the abstract an informative and balanced summary of what was done and what was found                                                                                  | 2                  |
| <b>Introduction</b>          |        |                                                                                                                                                                                      |                    |
| Background/rationale         | 2      | Explain the scientific background and rationale for the investigation being reported                                                                                                 | 3                  |
| Objectives                   | 3      | State specific objectives, including any prespecified hypotheses                                                                                                                     | 3                  |
| <b>Methods</b>               |        |                                                                                                                                                                                      |                    |
| Study design                 | 4      | Present key elements of study design early in the paper                                                                                                                              | 4                  |
| Setting                      | 5      | Describe the setting, locations, and relevant dates, including periods of recruitment, exposure, follow-up, and data collection                                                      | 4                  |
| Participants                 | 6      | (a) Give the eligibility criteria, and the sources and methods of selection of participants. Describe methods of follow-up                                                           | 4, 5               |
|                              |        | (b) For matched studies, give matching criteria and number of exposed and unexposed                                                                                                  | Not applicable     |
| Variables                    | 7      | Clearly define all outcomes, exposures, predictors, potential confounders, and effect modifiers. Give diagnostic criteria, if applicable                                             | 4, 5               |
| Data sources/<br>measurement | 8*     | For each variable of interest, give sources of data and details of methods of assessment (measurement). Describe comparability of assessment methods if there is more than one group | 5, 6               |
| Bias                         | 9      | Describe any efforts to address potential sources of bias                                                                                                                            | 6, 10              |
| Study size                   | 10     | Explain how the study size was arrived at                                                                                                                                            | 4, 5               |
| Quantitative variables       | 11     | Explain how quantitative variables were handled in the analyses. If applicable, describe which groupings were chosen and why                                                         |                    |
| Statistical methods          | 12     | (a) Describe all statistical methods, including those used to control for confounding                                                                                                | 6                  |
|                              |        | (b) Describe any methods used to examine subgroups and interactions                                                                                                                  | Not applicable     |
|                              |        | (c) Explain how missing data were addressed                                                                                                                                          | 6, 7               |
|                              |        | (d) If applicable, explain how loss to follow-up was addressed                                                                                                                       | 6, 7               |
|                              |        | (e) Describe any sensitivity analyses                                                                                                                                                | Not applicable     |
| <b>Results</b>               |        |                                                                                                                                                                                      |                    |

|                          |     |                                                                                                                                                                                                              |                |
|--------------------------|-----|--------------------------------------------------------------------------------------------------------------------------------------------------------------------------------------------------------------|----------------|
| Participants             | 13* | (a) Report numbers of individuals at each stage of study—eg numbers potentially eligible, examined for eligibility, confirmed eligible, included in the study, completing follow-up, and analysed            | Fig 1, 6, 7    |
|                          |     | (b) Give reasons for non-participation at each stage                                                                                                                                                         | Fig 1          |
|                          |     | (c) Consider use of a flow diagram                                                                                                                                                                           | Fig 1          |
| Descriptive data         | 14* | (a) Give characteristics of study participants (eg demographic, clinical, social) and information on exposures and potential confounders                                                                     | 4, 5           |
|                          |     | (b) Indicate number of participants with missing data for each variable of interest                                                                                                                          | Tables 1-4     |
|                          |     | (c) Summarise follow-up time (eg, average and total amount)                                                                                                                                                  | 7              |
| Outcome data             | 15* | Report numbers of outcome events or summary measures over time                                                                                                                                               | Not applicable |
| Main results             | 16  | (a) Give unadjusted estimates and, if applicable, confounder-adjusted estimates and their precision (eg, 95% confidence interval). Make clear which confounders were adjusted for and why they were included | 7              |
|                          |     | (b) Report category boundaries when continuous variables were categorized                                                                                                                                    | Not applicable |
|                          |     | (c) If relevant, consider translating estimates of relative risk into absolute risk for a meaningful time period                                                                                             | Not applicable |
| Other analyses           | 17  | Report other analyses done—eg analyses of subgroups and interactions, and sensitivity analyses                                                                                                               | Fig 2          |
| <b>Discussion</b>        |     |                                                                                                                                                                                                              |                |
| Key results              | 18  | Summarise key results with reference to study objectives                                                                                                                                                     | 9              |
| <b>Limitations</b>       |     |                                                                                                                                                                                                              |                |
| Interpretation           | 20  | Give a cautious overall interpretation of results considering objectives, limitations, multiplicity of analyses, results from similar studies, and other relevant evidence                                   | 9, 11          |
| Generalisability         | 21  | Discuss the generalisability (external validity) of the study results                                                                                                                                        | 9, 10          |
| <b>Other information</b> |     |                                                                                                                                                                                                              |                |
| Funding                  | 22  | Give the source of funding and the role of the funders for the present study and, if applicable, for the original study on which the present article is based                                                | 1              |

\*Give information separately for cases and controls in case-control studies and, if applicable, for exposed and unexposed groups in cohort and cross-sectional studies.

**Note:** An Explanation and Elaboration article discusses each checklist item and gives methodological background and published examples of transparent reporting. The STROBE checklist is best used in conjunction with this article (freely available on the Web sites of PLoS Medicine at <http://www.plosmedicine.org/>, Annals of Internal Medicine at <http://www.annals.org/>, and Epidemiology at <http://www.epidem.com/>). Information on the STROBE Initiative is available at [www.strobe-statement.org](http://www.strobe-statement.org).



# BMJ Open

## Wait a minute? An observational cohort study comparing iron stores in healthy Swedish infants at four months of age after 10, 60 and 180 seconds' umbilical cord clamping

|                                 |                                                                                                                                                                                                                                                                                                                                                                                                                                                                                                                                                                                                                                                                                                                                                                                                                                                                                                                                                                                                                                                                                                                                                                                                                                                                                                                                                                                                                                                                                                                          |
|---------------------------------|--------------------------------------------------------------------------------------------------------------------------------------------------------------------------------------------------------------------------------------------------------------------------------------------------------------------------------------------------------------------------------------------------------------------------------------------------------------------------------------------------------------------------------------------------------------------------------------------------------------------------------------------------------------------------------------------------------------------------------------------------------------------------------------------------------------------------------------------------------------------------------------------------------------------------------------------------------------------------------------------------------------------------------------------------------------------------------------------------------------------------------------------------------------------------------------------------------------------------------------------------------------------------------------------------------------------------------------------------------------------------------------------------------------------------------------------------------------------------------------------------------------------------|
| Journal:                        | <i>BMJ Open</i>                                                                                                                                                                                                                                                                                                                                                                                                                                                                                                                                                                                                                                                                                                                                                                                                                                                                                                                                                                                                                                                                                                                                                                                                                                                                                                                                                                                                                                                                                                          |
| Manuscript ID                   | bmjopen-2017-017215.R3                                                                                                                                                                                                                                                                                                                                                                                                                                                                                                                                                                                                                                                                                                                                                                                                                                                                                                                                                                                                                                                                                                                                                                                                                                                                                                                                                                                                                                                                                                   |
| Article Type:                   | Research                                                                                                                                                                                                                                                                                                                                                                                                                                                                                                                                                                                                                                                                                                                                                                                                                                                                                                                                                                                                                                                                                                                                                                                                                                                                                                                                                                                                                                                                                                                 |
| Date Submitted by the Author:   | 04-Oct-2017                                                                                                                                                                                                                                                                                                                                                                                                                                                                                                                                                                                                                                                                                                                                                                                                                                                                                                                                                                                                                                                                                                                                                                                                                                                                                                                                                                                                                                                                                                              |
| Complete List of Authors:       | <p>Askelöf, Ulrica; Dept of Clinical Science, Intervention and Technology , Division of Obstetrics and Gynecology, Karolinska Institutet; The Swedish National Umbilical Cord Blood Bank, Sahlgrenska University Hospital</p> <p>Andersson, Ola; Uppsala Universitet, Womens and Childrens health; Hallands sjukhus Halmstad, Research and Development</p> <p>Domellöf, Magnus; Umea University, Department of Clinical Sciences, Pediatrics</p> <p>Fasth, Anders; Goteborgs Universitet; The Swedish National Umbilical Cord Blood Bank, Sahlgrenska University Hospital</p> <p>Hallberg, Boubou; Karolinska Hospital and Karolinska Institutet, Neonatology &amp; CLINTEC</p> <p>Hellström-Westas, Lena; Uppsala Universitet, Women's and Children's Health</p> <p>Pettersson, Karin; Department of Clinical Science, Intervention and Technology, Division of Obstetrics and Gynecology, Karolinska Institutet; The Swedish National Umbilical Cord Blood Bank, Sahlgrenska University Hospital</p> <p>Westgren, Magnus; Department of Clinical Science, Intervention and Technology, Karolinska Institute; The Swedish National Umbilical Cord Blood Bank, Sahlgrenska University Hospital</p> <p>Wiklund, Ingela E ; Department of Clinical Sciences, Danderyd Hospital</p> <p>Götherström, Cecilia; Department of Clinical Science, Intervention and Technology, Division of Obstetrics and Gynecology, Karolinska Institutet; The Swedish National Umbilical Cord Blood Bank, Sahlgrenska University Hospital</p> |
| <b>Primary Subject Heading</b>: | Obstetrics and gynaecology                                                                                                                                                                                                                                                                                                                                                                                                                                                                                                                                                                                                                                                                                                                                                                                                                                                                                                                                                                                                                                                                                                                                                                                                                                                                                                                                                                                                                                                                                               |
| Secondary Subject Heading:      | Paediatrics, Haematology (incl blood transfusion)                                                                                                                                                                                                                                                                                                                                                                                                                                                                                                                                                                                                                                                                                                                                                                                                                                                                                                                                                                                                                                                                                                                                                                                                                                                                                                                                                                                                                                                                        |
| Keywords:                       | PAEDIATRICS, UMBILICAL CORD CLAMPING, IRON DEFICIENCY, Fetal medicine < OBSTETRICS                                                                                                                                                                                                                                                                                                                                                                                                                                                                                                                                                                                                                                                                                                                                                                                                                                                                                                                                                                                                                                                                                                                                                                                                                                                                                                                                                                                                                                       |
|                                 |                                                                                                                                                                                                                                                                                                                                                                                                                                                                                                                                                                                                                                                                                                                                                                                                                                                                                                                                                                                                                                                                                                                                                                                                                                                                                                                                                                                                                                                                                                                          |

1  
2  
3  
4  
5  
6  
7  
8  
9  
10  
11  
12  
13  
14  
15  
16  
17  
18  
19  
20  
21  
22  
23  
24  
25  
26  
27  
28  
29  
30  
31  
32  
33  
34  
35  
36  
37  
38  
39  
40  
41  
42  
43  
44  
45  
46  
47  
48  
49  
50  
51  
52  
53  
54  
55  
56  
57  
58  
59  
60

For peer review only

1  
2  
3 **Wait a minute? An observational cohort study comparing iron stores in healthy Swedish infants at**  
4 **four months of age after 10, 60 and 180 seconds' umbilical cord clamping**  
5  
6  
7

8 Ulrica Askelöf, RNM<sup>a,g</sup>, Ola Andersson, MD, PhD<sup>b</sup>, Magnus Domellöf, MD, Prof<sup>c</sup>, Anders Fasth, MD,  
9 Prof<sup>d,g</sup>, Boubou Hallberg, MD, PhD<sup>h</sup>, Lena Hellström-Westas, MD, Prof<sup>b</sup>, Karin Pettersson, MD,  
10 Associate Prof<sup>a,g</sup>, Magnus Westgren, MD, Prof<sup>a,g</sup>, Ingela Wiklund, RNM, Associate Prof<sup>e</sup>, Cecilia  
11 Götherström, Associate Prof<sup>a,f,g</sup>  
12  
13

14 **Affiliations:** <sup>a</sup>Department of Clinical Science, Intervention and Technology, Division of Obstetrics and  
15 Gynecology, Karolinska Institutet, Stockholm, Sweden; <sup>b</sup>Department of Women's and Children's  
16 Health, Uppsala University, Uppsala, Sweden; <sup>c</sup>Department of Clinical Sciences, Pediatrics, Umeå  
17 University, Umeå, Sweden; <sup>d</sup>Department of Pediatrics, Institution of Clinical Sciences, University of  
18 Gothenburg, Gothenburg, Sweden; <sup>e</sup>Department of Clinical Sciences, Danderyd Hospital, Stockholm,  
19 Sweden and <sup>f</sup>Center for Hematology and Regenerative Medicine, Karolinska Institutet, Stockholm,  
20 Sweden; <sup>g</sup>The Swedish National Umbilical Cord Blood Bank, Sahlgrenska University Hospital,  
21 Gothenburg, Sweden; <sup>h</sup>Department of Neonatology, CLINTEC, Karolinska Institutet and University  
22 Hospital, Stockholm, Sweden.  
23  
24  
25

26 **Corresponding author:** Associate Prof Cecilia Götherström at Cecilia.gotherstrom@ki.se  
27

28 **Funding Source:** The prospective part of the study was supported by The Swedish Childhood Cancer  
29 Foundation; The regional agreement on medical training and clinical research (ALF) at Karolinska  
30 Institutet and at Sahlgrenska University Hospital and The Dr Åke Olsson Foundation for  
31 Hematological Research, Stockholm. The RCT that provided data for the historical cohorts was  
32 supported by Regional Scientific Council of Halland; the HASNA Foundation, Halmstad; HRH Crown  
33 Princess Lovisa's Foundation for Child Care, Stockholm; and the Framework of Positive Scientific  
34 Culture, Hospital of Halland, Halmstad. The funders were not involved in the study design, data  
35 analysis, or manuscript preparation.  
36  
37  
38

39 **Financial Disclosure:** The authors have no financial relationships relevant to this article to disclose.

40 **Conflict of Interest:** The authors have no conflicts of interest relevant to this article to disclose.

41 **Data Sharing Statement:** There are no other unpublished data available.  
42  
43  
44

45 **Clinical Trial Registration:** Clinicaltrial.gov NCT01245296.  
46

47 **Ethics Approval:** By the Regional Ethical Review Board in Stockholm (2011/2142-31/3) and the  
48 Regional Ethical Review Board at Lund University (41/2008).  
49

50 **Abbreviations:** ANOVA- analysis of variance, CI – confidence interval, CRP – C reactive protein, ID -  
51 iron deficiency, MCV - mean cell volume, NS – non significant, RCT - randomized controlled trial, s –  
52 seconds, SD – standard deviation, UC – umbilical cord, UCB – umbilical cord blood.  
53  
54  
55  
56  
57  
58  
59  
60

## Abstract

**BACKGROUND AND OBJECTIVE:** Umbilical cord blood (UCB) is a valuable stem cell source used for transplantation. Immediate umbilical cord (UC) clamping is widely practiced but delayed UC clamping is increasingly advocated to reduce possible infant anaemia. The aim of this study was to investigate an intermediate UC clamping time point and to evaluate iron status at the age of four months in infants who had the UC clamped after 60 seconds (s) and compare the results to immediate and late UC clamping.

**DESIGN:** Prospective observational study with two historical controls.

**SETTING:** A university hospital in Stockholm, Sweden and a county hospital in Halland, Sweden.

**METHOD:** Iron status was assessed at four months in 200 prospectively recruited term infants whose UC was clamped 60s after birth. The results were compared to data from a previously conducted randomized controlled trial including infants subjected to UC clamping at  $\leq 10$  s (n=200) or  $\geq 180$  s (n=200) after delivery.

**RESULTS:** After adjustment for age differences at the time of follow-up, serum ferritin concentrations were 77  $\mu\text{g/L}$ , 103  $\mu\text{g/L}$  and 114  $\mu\text{g/L}$  in the 10s, 60s and 180s groups, respectively. The adjusted ferritin concentration was significantly higher in the 60s group compared to the 10s group (P=0.002) while the difference between the 60s and 180s groups was not significant (P=0.29).

**CONCLUSION:** In this study of healthy term infants, 60s UC clamping, resulted in higher serum ferritin concentrations at four months compared to 10s UC clamping. The results suggest that delaying the UC clamping for 60s reduces the risk for iron deficiency.

### Strengths and limitations of the study

- This study compares iron- and blood status at the age of four months in children whose UC were clamped after 60s with children whose UC were clamped  $\leq 10$ s or  $\geq 180$ s.
- In this study we focus on potential consequences for the child caused by different UC clamping times, and not the quality of the collected UCB.
- This prospective observational study uses historical controls and results should be interpreted with caution because of potential confounding bias.
- We did not use a non-inferiority approach for this study since we aimed to compare results after 60s UC clamping with both 10s- and 180s UC clamping.

## INTRODUCTION

During the last decades, immediate the umbilical cord (UC) clamping has been part of active management of labour with the aim to reduce maternal haemorrhage at birth [1, 2]. Hence, the placenta and umbilical cord blood (UCB), have been regarded as waste products following birth.

However, immediate UC clamping may deprive infants of up to one third of the total fetoplacental blood volume [3, 4], and increase the risk of iron deficiency (ID) in the first 3-6 months of life [5-9].

Iron deficiency is associated with impaired neurodevelopment affecting cognitive, motor, and behavioural skills in young children [10-12]. For this reason the World Health Organization recommends delayed UC clamping for 1-3 minutes after birth [13].

On the other side, UCB is a valuable stem cell source for the 30-50% of patients that need a hematopoietic stem cell transplantation, but who lack a suitable family or public registry donor [14, 15]. Therefore, UCB is collected and stored in altruistic and private UCB banks. The earlier the UC is clamped, the more blood is left to collect from the placenta and for this reason immediate UC clamping is normally practiced in UCB collection. More than 35.000 transplantations with UCB have been performed worldwide [14].

We hypothesized that if the UC is clamped at 60 seconds (s) after birth, a sufficient amount of blood will have passed from the placenta to the infant to reduce the risk of ID and anaemia while still allowing collection of UCB for banking [16]. The objective of the current study was to evaluate iron status and complete blood counts at the age of four months in infants who had the UC clamped after 60s and compare the results to immediate ( $\leq 10$ s) and late ( $\geq 180$ s) UC clamping. In this study we focused on potential consequences for the donors only.

## MATERIALS AND METHODS

We performed an observational cohort study using one prospective clinical cohort and data from a previously performed randomized controlled trial (RCT) [6]. The prospectively recruited infants were born at Karolinska University Hospital Huddinge, Sweden between April 2012 and May 2015, to parents who agreed to donate UCB to the Swedish National Umbilical Cord Blood Bank, a public bank without profit interest. The UC was clamped after  $60 \pm 10$ s. The historical cohorts consisted of data from infants who were randomized to immediate (within 10s after birth) or late (after 180s) UC clamping, respectively, in a trial conducted by three of the co-authors at the Hospital of Halland in Halmstad, Sweden between April 2008 and September 2009 [6].

### Outcome measures

The primary outcome variable was ferritin as a measure of iron stores, at the age of four months and secondary outcomes included haemoglobin, transferrin saturation, soluble transferrin receptors, mean cell volume (MCV) as well as ID (defined as  $\geq 2$  iron indicators outside reference range with the following cut-off values: ferritin  $< 20 \mu\text{g/L}$ , [17] MCV  $< 73 \text{ fL}$ , [17] transferrin saturation  $< 10\%$  [18] and transferrin receptor  $> 7 \text{ mg/L}$  [6]). Since ferritin is an acute phase reactant, C reactive protein (CRP) was analysed in order to exclude falsely elevated ferritin measurements. The infant's dietary habits at four months were also considered as well as the relevance of infant sex for iron and blood status at that age.

### Sample size

A formal power calculation was not performed for the current study but the sample size was based on the group size in the original RCT by Andersson *et al.* 2011 (the historical cohorts) [6]. The power calculation by Andersson *et al.* showed that a group size of 200 would enable detection of a 29% difference in geometric mean serum ferritin between 10s and 180s UC clamping with a power of 80% and a significance level of 0.05, assuming a mean serum ferritin concentration of  $110 \mu\text{g/L}$  in the 180s-group while allowing an attrition of 25% [6]. Based on the results from Andersson *et al.*,

1  
2  
3 demonstrating a 45% difference in ferritin concentration between 10s and 180s UC clamping, we  
4  
5 decided to include 200 children also in the prospective group.  
6

### 7 **Study population and inclusion criteria**

8  
9 The same inclusion criteria applied for the prospective and historical cohorts: healthy mother,  
10  
11 normal, singleton pregnancy, gestational age 37+0 to 41+6 weeks and planned vaginal delivery with  
12  
13 cephalic presentation [6]. The mother also had to understand Swedish well enough to consent  
14  
15 participation in the study. In the prospectively recruited cohort, parents also had to agree to altruistic  
16  
17 donation of UCB, and to the modified UC clamping strategy. Exclusion criteria were also the same in  
18  
19 the three groups: smoking mother, serious congenital malformations, syndromes, or other congenial  
20  
21 diseases that could affect the outcome measures. For this study, we only included data from the RCT  
22  
23 that were handled according to per protocol, as compared to the analysis by intention to treat in the  
24  
25 original RCT [6]. Moreover, like the RCT, we only included children with CRP<10 in the analysis. All  
26  
27 parents donating UCB at Karolinska University Hospital Huddinge that met the inclusion criteria were  
28  
29 offered to participate in the study upon arrival at the delivery unit. Midwives were instructed to  
30  
31 clamp the UC 60s after birth in deliveries where parents had consented to participate in the study.  
32  
33 Staff in charge of collection of UCB measured the exact timing of UC clamping using a digital timer.  
34  
35 Only children whose UC were clamped at 60 ±10s were included in the study. Oral and written  
36  
37 informed consent was obtained from one or both of the parents. The study was approved by the  
38  
39 regional ethical review board in Stockholm (2011/2142-31/3) and the RCT was approved by the  
40  
41 regional ethical review board at Lund University (41/2008).  
42  
43  
44  
45

### 46 **Data collection and blood samples**

47  
48 Midwives were instructed to hold the new-born baby below the uterine level for the first 30s before  
49  
50 placing the infant on the mother's abdomen, in accordance with the study by Andersson *et al.* 2011  
51  
52 [6]. The UC clamping technique used in the prospectively recruited cohort was similar to the  
53  
54 historical groups except for the timing. Venous blood samples were analysed at birth from the UC, at  
55  
56 two to three days of age in connection with metabolic screening and at four months (±21 days) at a  
57  
58  
59  
60

1  
2  
3 scheduled follow-up visit. At birth and at four months, serum ferritin, haemoglobin, haematocrit,  
4  
5 MCV, reticulocyte count, transferrin saturation, transferrin receptor and CRP were analysed and at  
6  
7 two to three days of age we analysed haemoglobin, haematocrit and bilirubin. EDTA tubes were used  
8  
9 for blood count and serum separator tubes for iron status, bilirubin and CRP (Microvette, Sarstedt AG  
10  
11 & Co, Nümbrecht, Germany). Blood status was analysed using equal methods and equipment in both  
12  
13 the laboratory at Karolinska University Hospital (Sysmex XE5000, Sysmex, Kobe, Japan) and at the  
14  
15 Hospital of Halland (Sysmex XE2100, Sysmex, Kobe, Japan). Analysis of iron status and CRP could be  
16  
17 performed at the same laboratory as in the RCT [6], and therefore the blood samples collected at  
18  
19 Karolinska University Hospital were centrifuged and the serum kept at -70 degrees Celsius before  
20  
21 sent for analysis at the Clinical Chemistry Laboratory at the Hospital of Halland. The samples were  
22  
23 then thawed and analysed using a Cobas 6000 (Roche Diagnostics, Basel, Switzerland), the same  
24  
25 method as in the RCT [6].  
26  
27

### 28 **Statistical analysis**

29  
30 Analyses on the two historical cohorts, 10s and 180s, were calculated only on infants receiving  
31  
32 intervention per protocol in order to obtain clearly defined groups according to time of UC clamping.  
33  
34 Baseline characteristics were compared across groups using analysis of variance (ANOVA). Means of  
35  
36 outcome measures in the three cohorts were compared using the Bonferroni method. We also  
37  
38 performed pairwise comparisons (60s vs 10s and 60s vs 180s) using Student's t-test for variables with  
39  
40 normal distribution that were statistically significant in the Bonferroni analyses. Ferritin  
41  
42 concentration was log<sub>10</sub> transformed for analysis because of skewed distribution and the results  
43  
44 were presented as geometric means. Categorical variables were compared between groups using  
45  
46 Fisher's Exact test for pairwise comparisons. Adjusted group means were compared using ANOVA  
47  
48 and a binary logistic regression model was used to adjust for sex and age in the evaluation of ID at  
49  
50 four months. A P-value less than 0.05 were considered significant. No imputation of missing data was  
51  
52 performed. Loss to follow-up was registered, but not examined further. IBM SPSS for Windows,  
53  
54 version 22 was used for the analyses.  
55  
56  
57  
58  
59  
60



## RESULTS

Of the 200 prospectively recruited infants, 191 were included in the analysis as compared to 166 in the 10s and 168 in the 180s groups. Infants lost to follow up or excluded due to not fulfilling inclusion criteria are shown in Fig 1.

### Baseline data

There were no significant differences in the 60s group as compared to the 10s and 180s groups with regard to maternal or neonatal characteristics. The 10s group had higher UC haemoglobin (163 vs 153 g/L,  $P<0.001$ ) and higher UC haematocrit (48.7 vs 47.0%,  $P=0.005$ ) than the 60s group. There were no significant differences between the 60s and the 180s groups (Table 1).

### Two to three day-follow-up

At two to three days, blood samples were obtained from 140 infants in the 10s group, 107 in the 60s group, and 141 in the 180s group (Figure 1). The prevalence of anaemia was higher in the 10s compared to the 60s and 180s groups (9 (6.4%), 2 (1.9%) and 2 (1.4%)) respectively ( $P=0.04$ ).

Haemoglobin was lower in the 10s and 60s groups compared to the 180s group; 175, 180 and 189 g/L respectively ( $P=0.001$  for 60s vs 180s). Bilirubin did not differ between the groups. Anaemic children were referred for further diagnostics but none needed treatment.

### Primary outcome

In total 468 (78%) infants had follow up at four months (children excluded or lost to follow up are shown in Figure 1). In the 60s group, the infants ( $n=147$ ) were four days older than the historical groups from the RCT ( $126\pm 7$  days vs  $122\pm 6$  days,  $P<0.001$ ). The geometric mean ferritin levels were 80, 96 and 117  $\mu\text{g/L}$  respectively in the 10s, 60s and 180s groups ( $P=0.052$  for 10s vs 60s;  $P=0.02$  for 60s vs 180s) (Table 2). After adjustment for the age difference, the geometric means were 77, 103 and 114  $\mu\text{g/L}$  respectively ( $P=0.002$  for 10s vs 60s;  $P=0.29$  for 60s vs 180s) (Table 3).

### Secondary outcomes

All secondary outcome variables are shown in Table 2. Haemoglobin levels at four months were higher in the 60s group compared to 10s and 180s, but the difference did not remain in the age

1  
2  
3 adjusted model (Table 3). There were no statistically significant differences in the prevalence of  
4  
5 anaemia in the 60s group as compared to the other two groups (Table 4). After adjustment for age at  
6  
7 the time of follow-up, there were no differences between the 10s and 60s groups in haematocrit,  
8  
9 MCV, reticulocyte count, transferrin receptor or transferrin saturation. The 60s group had  
10  
11 significantly lower adjusted MCV and higher adjusted transferrin receptor compared to the 180s  
12  
13 group, but there were no differences in haematocrit, reticulocyte count or transferrin saturation  
14  
15 (Table 3). The prevalence of ID was 8 (5.2%), 7 (4.8%) and 1 (0.7%) respectively in the 10s, 60s and  
16  
17 180s groups ( $P>0.99$  for 10s vs 60s and  $P=0.04$  for 60s vs 180s) (Table 4). After statistical adjustments  
18  
19 for sex and age at the time of follow-up, the prevalence of ID did not differ between the 60s group  
20  
21 and the two other groups. The proportion of infants that were exclusively breast fed at four months  
22  
23 did not differ between the groups (79 (52%), 92 (58%) and 89 (56%) respectively in the 10s, 60s and  
24  
25 180s groups. The impact of exclusive breast feeding on ferritin concentration and ID were further  
26  
27 assessed in an adjusted model but no correlation was found (data not shown).  
28  
29

### 30 31 **Sex differences**

32  
33 Iron and blood status at four months were further assessed by analysing differences according to  
34  
35 infant sex. When data from the three cohorts were analysed together, geometric mean ferritin was  
36  
37 lower in boys than in girls and ID was more prevalent amongst boys (Fig 2A and 2B). Haemoglobin  
38  
39 concentrations did not differ significantly between boys and girls and neither did the prevalence of  
40  
41 anaemia (data not shown).  
42  
43

### 44 45 **DISCUSSION**

46  
47 We compared infants' iron and blood status at the age of four months after three different UC  
48  
49 clamping time intervals (60s versus  $\leq 10$ s, and  $\geq 180$ s, respectively). Previous studies have compared  
50  
51 immediate and late UC clamping but the definition of "late" in these studies varies from 60s to 180s  
52  
53 or after birth of the placenta [5, 7, 8]. The current study evaluates an intermediate UC clamping  
54  
55 strategy that can be used in connection with altruistic donation of UCB for clinical banking. When  
56  
57 asking parents to donate their child's UCB for the potential good of others, it is essential to inform of  
58  
59

1  
2  
3 possible consequences for the child. We demonstrated that after adjustment for age difference at  
4  
5 the time of follow-up, there were no statistically significant differences in ferritin concentration  
6  
7 between the 60s and 180s groups but the 60s group had significantly higher ferritin concentrations  
8  
9 compared to 10s. The main reason for the effect of age on ferritin during infancy is rapid growth  
10  
11 which leads to a rapidly expanding blood volume and depletion of iron stores [9].  
12

13  
14 Results from the present study are in accordance with a Brazilian RCT that demonstrated higher  
15  
16 ferritin concentration at the age of three months in children whose UC were clamped after 60s  
17  
18 compared to immediate UC clamping [19]. However, our findings are in contrast to a study by  
19  
20 Cernadas *et al.*, who reported no differences in ferritin six months after birth comparing 15s and 60s  
21  
22 UC clamping. The difference in ferritin between the 60s and 180s groups were not presented [20].  
23  
24 The present study indicates that a 60s delay before UC clamping results in a mean serum ferritin at 4  
25  
26 months of age corresponding to 90% of the mean ferritin after 180s UC clamping.  
27

28  
29 In the current study, children in the 60s group had the lowest haemoglobin of all three groups at  
30  
31 birth (10s 163 g/L, 60s 153 g/L, 180s 158 g/L) but at four months, there were no longer any  
32  
33 differences between the groups in our adjusted model. The original RCT as well as a Cochrane report  
34  
35 found higher concentrations of haemoglobin after immediate than late UC clamping at birth [6, 8]. As  
36  
37 speculated in a previous publication, this difference may not reflect true difference in haemoglobin  
38  
39 but could be a result of trans endothelial plasma leakage in the UC after UC clamping [6].  
40

41  
42 The prevalence of ID was higher in the 10s and 60s groups compared to the 180s group. However,  
43  
44 when adjusting for sex and age at the time of follow-up, there were no longer any statistically  
45  
46 significant differences between the three groups. In accordance with previous studies on ID in  
47  
48 infancy, we found that at four months, boys had significantly lower geometric mean ferritin and  
49  
50 more often ID than girls [21, 22]. Nevertheless, the aim of the study was not to compare differences  
51  
52 according to sex, and the groups were therefor too small to draw any reliable conclusions of sex and  
53  
54 ID. It has been suggested that the differences in iron status between the two sexes may be hormone-  
55  
56 related but it is also influenced by genetic factors, which may differ in populations with different  
57  
58  
59  
60

1  
2  
3 ethnicity [22]. Also, when considering the generalisability of this study, readers should bear in mind  
4  
5 that all children were placed below the uterine level for 30s directly after birth. This may be in  
6  
7 contrast to the practice in other delivery settings, where the children are often placed directly on the  
8  
9 woman's abdomen, which may affect the speed of the placental transfusion.  
10

### 11 **Limitations of the study**

12  
13 A limitation of this study is that we have no record of the parents' ethnic or socio-economic  
14  
15 background, and we were therefore unable to draw any conclusions on possible impact of these  
16  
17 factors. When comparing different interventions, RCTs are regarded as the golden standard.  
18  
19 However, randomization into 10s UC clamping for this study was considered unethical since there is  
20  
21 evidence that children benefit from prolonged placental transfusion for at least 60s, and the clinical  
22  
23 routine in Sweden is to wait 180s before UC clamping in normal deliveries. We used the historical  
24  
25 cohorts from the RCT in Halmstad, Sweden as controls in this study. The prospectively recruited  
26  
27 cohort (60s) is from a large birth clinic in Stockholm, Sweden while the controls are from a smaller  
28  
29 town where the participants were recruited two to five years earlier. Although the inclusion criteria  
30  
31 were the same and pregnant mothers in Sweden follow the same well-controlled antenatal program  
32  
33 and the baseline data showed no significant differences in maternal or infant characteristics, it is  
34  
35 difficult to know if the study populations are homogenous. We did not use a non-inferiority approach  
36  
37 for this study since we aimed to compare results after 60s UC clamping with 10s and 180s. Nor did we  
38  
39 perform a power calculation when designing the study, but included an equally large group as the  
40  
41 two historical groups. This is a weakness which, should be taken into consideration. We have taken  
42  
43 measures to avoid systematic biases caused by differences in laboratory routines between the two  
44  
45 hospitals by using the same laboratory for analysing the iron status variables as well as CRP.  
46  
47  
48  
49  
50 Collection of UCB for transplantation is a growing and life-saving practice. Tens of thousands UCB  
51  
52 units are altruistically donated and stored for public use each year, and as a result new-borns are  
53  
54 exposed to limited UC clamping time. The idea that UCB left in the placenta after birth is a mere  
55  
56 waste that is thrown away if not collected is obsolete. Optimizing UC clamping time and investigating  
57  
58  
59  
60

1  
2  
3 the clinical significance to minimize risks for the infant while still enabling collection of UCB for  
4  
5 transplantation is a great, but necessary, challenge. A study evaluating volume and TNC in UCB units  
6  
7 collected at the Swedish National Umbilical Cord Blood Bank showed that 37 % of units collected  
8  
9 after 60s UC clamping met the banking criteria compared to 47 % after immediate UC clamping [16].  
10  
11 This is information prospective parents considering donating UCB should receive.  
12

### 13 14 **CONCLUSION**

15  
16 In this observational study, significantly more children in the 10s UC clamping group had low iron  
17  
18 stores at four months compared to children in the 60s and 180s UC clamping groups. After  
19  
20 adjustment for age and sex, there were no statistically significant differences in ferritin concentration  
21  
22 between 60 and 180s UC clamping. 60s UC clamping is therefore preferable to immediate UC  
23  
24 clamping. Delaying UC clamping may be more important in boys than in girls to avoid ID in early  
25  
26 childhood. Larger studies with long term follow-up is needed to establish the clinical relevance of  
27  
28 different UC clamping strategies.  
29  
30  
31

### 32 33 **CONTRIBUTORS**

34  
35 Dr C. Götherström conceptualized and designed the study, analyzed data, critically revised and  
36  
37 approved the final manuscript as submitted. Mrs U. Askelöf conceptualized and designed the study,  
38  
39 carried out all data collection in the prospective cohort, carried out all analyses, drafted the initial  
40  
41 manuscript, and approved the final manuscript as submitted. Dr O. Andersson designed the data  
42  
43 collection instruments, contributed to the study design and provided data for the historical cohorts.  
44  
45 He also carried out the initial analyses, critically reviewed and revised the manuscript, and approved  
46  
47 the final manuscript as submitted. Profs M. Domellöf, A. Fasth, L. Hellström-Westas, M. Westgren,  
48  
49 Associate Profs K. Pettersson and I. Wiklund and Dr B. Hallberg participated in the study design,  
50  
51 reviewed and revised the manuscript and approved the final manuscript as submitted.  
52  
53  
54  
55  
56  
57  
58  
59  
60

**ACKNOWLEDGEMENTS**

The authors thank Harjeet Kaur Malhi, Astrid Börjesson, Malin Hjertqvist and Camilla Halzius, the staff at the delivery ward at Karolinska University Hospital Huddinge and all mothers and infants who participated in the study. This study was supported by grants from The Swedish Childhood Cancer Foundation, The regional agreement on medical training and clinical research (ALF) in Stockholm and Gothenburg and The Dr Åke Olsson Foundation for Hematological Research, Stockholm.

For peer review only

**TABLE 1.** Baseline characteristics of mothers and infants according to time for umbilical cord clamping

|                                            | Umbilical cord clamping time |              |                    | P       |
|--------------------------------------------|------------------------------|--------------|--------------------|---------|
|                                            | 10s<br>n=166 (HC)            | 60s<br>n=191 | 180s<br>n=168 (HC) |         |
| <b>Maternal characteristics</b>            |                              |              |                    |         |
| Age (years)                                | 31.7(4.2)                    | 30.7(4.7)    | 30.8(4.9)          | NS      |
| Parity (including study child)             | 1.81(0.87)                   | 1.86(0.76)   | 1.76(0.74)         | NS      |
| Weight at first antenatal visit (kg)       | 66.4(12.0)                   | 67.3(11.5)   | 67.3(12.1)         | NS      |
| Body mass index                            | 23.6(3.8)                    | 24.5(3.9)    | 23.9(3.6)          | NS      |
| Haemoglobin at first antenatal visit (g/L) | 128(9)                       | 128(10)      | 128(11)            | NS      |
| No (%) of vaginal deliveries:              |                              |              |                    |         |
| Non-instrumental                           | 157(95)                      | 184(96)      | 157(94)            | NS      |
| Vacuum extraction                          | 8(5)                         | 7(4)         | 11(7)              | NS      |
| Forceps                                    | 1(0.6)                       | 0(0)         | 0(0)               | NS      |
| <b>Infant characteristics</b>              |                              |              |                    |         |
| Gestational age (weeks)                    | 40.0(1.1)                    | 40.0(1.0)    | 40.0(1.1)          | NS      |
| No (%) of males                            | 83(50)                       | 98(51)       | 73(43)             | NS      |
| Birth weight (g)                           | 3523(483)                    | 3603(454)    | 3633(464)          | NS      |
| Birth length (cm)                          | 50.7(1.9)                    | 50.6(1.8)    | 50.9(1.9)          | NS      |
| Head circumference (cm)                    | 34.7(1.3)                    | 35.1(1.3)    | 35.0(1.4)          | NS      |
| Umbilical cord haemoglobin (g/L)           | 163(15)                      | 153(20)      | 158(18)            | <0.001* |
| Umbilical cord haematocrit (%)             | 48.7(4.3)                    | 47.0(5.5)    | 47.1(5.0)          | 0.005** |

Values are means (SD) unless stated otherwise. P<0.05 was considered significant.

NS=non-significant; HC= Historical cohort.

\*Comparison of 10s and 60s. For 180s and 60s, P=0.063.

\*\*Comparison of 10s and 60s. For 180s and 60s, P>0.99.

**TABLE 2.** Outcome measures at the age of four months in infants whose umbilical cord were clamped after 10s, 60s or 180s

|                                           | Umbilical cord clamping time |                |                    | 60s vs 10s                  |        | 60s vs 180s                 |        |
|-------------------------------------------|------------------------------|----------------|--------------------|-----------------------------|--------|-----------------------------|--------|
|                                           | 10s<br>n=153 (HC)            | 60s<br>n=147   | 180s<br>n=148 (HC) | Mean difference<br>(95% CI) | P      | Mean difference<br>(95% CI) | P      |
| Infant age (days)                         | 122 (6)                      | 126 (7)        | 122 (6)            | 5 (3 to 6)                  | <0.001 | 4 (3 to 6)                  | <0.001 |
| <b>Main outcome measures</b>              |                              |                |                    |                             |        |                             |        |
| Geometric mean (range)<br>ferritin (µg/L) | 80 (33 to 191)               | 96 (44 to 208) | 117 (58 to 232)    | 0.83 (0.69 to 1.45)*        | 0.052  | 1.21 (1.03 to 1.44)*        | 0.02   |
| Haemoglobin (g/L)                         | 113 (7)                      | 115 (8)        | 113 (8)            | 2 (0 to 4)                  | 0.047  | 2 (0 to 4)                  | 0.03   |
| <b>Blood count</b>                        |                              |                |                    |                             |        |                             |        |
| Haematocrit (%)                           | 33.0 (2.0)                   | 33.3 (2.2)     | 32.7 (2.1)         | 0.3 (-0.2 to 0.8)           | 0.19   | 1 (0 to 1)                  | 0.02   |
| Mean cell volume (fL)                     | 77.9 (3.1)                   | 77.7 (3.7)     | 79.2 (3.0)         | -0.2 (-1 to 0.6)            | 0.67   | -1.5 (-2.3 to -0.7)         | <0.001 |
| Reticulocyte count (x10 <sup>9</sup> /L)  | 37 (11)                      | 36 (11)        | 40 (11)            | -1 (-4 to 1)                | 0.39   | -4 (-6 to -1)               | 0.01   |
| <b>Iron status</b>                        |                              |                |                    |                             |        |                             |        |
| Transferrin receptor (mg/L)               | 4.00 (0.80)                  | 4.07 (0.92)    | 3.71 (0.69)        | 0.07 (-0.13 to 0.26)        | 0.51   | 0.35 (0.17 to 0.54)         | <0.001 |
| Transferrin saturation (%)                | 16 (6)                       | 16 (8)         | 18 (6)             | 1 (-1 to 2)                 | 0.40   | -2 (-3 to 0)                | 0.03   |

Values are means (SD) unless stated otherwise. HC= Historical cohort.

\*Geometric mean ratio (95% CI for geometric mean).

Successful analyses in the 60s and 180s groups: haemoglobin (n=140, 144), haematocrit, mean cell volume, reticulocyte count (n=135, 144), ferritin (n=147, 148), transferrin receptor (n=147, 148), transferrin saturation (n=145, 148).



**TABLE 3.** Outcome measures at the age of four months adjusted for infant age

|                                           | Umbilical cord clamping time |                     |                     | P<br>60s vs 10s | P<br>60s vs 180s |
|-------------------------------------------|------------------------------|---------------------|---------------------|-----------------|------------------|
|                                           | Adjusted means (95% CI)      |                     |                     |                 |                  |
|                                           | 10s<br>n=152 (HC)            | 60s<br>n=147        | 180s<br>n=148 (HC)  |                 |                  |
| <b>Main outcome measures</b>              |                              |                     |                     |                 |                  |
| Geometric mean (range)<br>ferritin (µg/L) | 77 (68 to 87)                | 103 (90 to 117)     | 114 (100 to 129)    | 0.002           | 0.29             |
| Haemoglobin (g/L)                         | 113 (112 to 115)             | 114 (113 to 116)    | 113 (112 to 114)    | 0.30            | 0.17             |
| <b>Blood count</b>                        |                              |                     |                     |                 |                  |
| Haematocrit (%)                           | 33.1 (32.7 to 33.4)          | 33.1 (32.8 to 33.5) | 32.7 (32.4 to 33.1) | 0.30            | 0.12             |
| Mean cell volume (fL)                     | 77.8 (77.3 to 78.3)          | 77.9 (77.3 to 78.4) | 79.1 (78.6 to 79.6) | 0.30            | 0.003            |
| Reticulocyte count (x10 <sup>9</sup> /L)  | 36.9 (35.2 to 38.7)          | 37.0 (35.0 to 38.9) | 39.4 (37.6 to 41.2) | 0.99            | 0.07             |
| <b>Iron status</b>                        |                              |                     |                     |                 |                  |
| Transferrin receptor (mg/L)               | 4.01 (3.87 to 4.14)          | 4.05 (3.92 to 4.19) | 3.72 (3.59 to 3.85) | 0.62            | 0.001            |
| Transferrin saturation (%)                | 15.7 (14.7 to 16.7)          | 16.6 (15.5 to 17.7) | 18.1 (17 to 19.2)   | 0.25            | 0.06             |

Values are means (95% CI) adjusted for infant age (days from birth) unless stated otherwise.

HC= Historical cohort. Successful analyses for the 60s group were: ferritin (n=147), haemoglobin (n=140), haematocrit, mean cell volume, reticulocyte count (n=135), transferrin receptor, and transferrin saturation (n=145). For the 180s group; blood status (n=144).

**TABLE 4.** Infants with iron status indicators outside reference limits at the age of 4 months according to umbilical cord clamping time

|                              | Umbilical cord clamping time |              |                    | P<br>60s vs 10s | P<br>60s vs 180s |
|------------------------------|------------------------------|--------------|--------------------|-----------------|------------------|
|                              | 10s<br>n=153 (HC)            | 60s<br>n=147 | 180s<br>n=148 (HC) |                 |                  |
| Ferritin <20 µg/L            | 11 (7.2)                     | 4 (2.7)      | 0 (0)              | 0.11            | 0.06             |
| Anaemia (Hb<105 g/L)         | 20 (13.1)                    | 16 (11.4)    | 20 (13.9)          | 0.72            | 0.60             |
| Mean cell volume <73 fL      | 8 (5.2)                      | 14 (10.4)    | 3 (2.1)            | 0.12            | 0.01             |
| Transferrin saturation <10%  | 22 (14.4)                    | 15 (10.3)    | 8 (5.4)            | 0.38            | 0.13             |
| Transferrin receptor >7 mg/L | 0 (0)                        | 2 (1.4)      | 0 (0)              | 0.24            | 0.25             |
| Iron deficiency*             | 8 (5.2)                      | 7 (4.8)      | 1 (0.7)            | 1.00            | 0.04             |

Values are unadjusted numbers (%). HC= Historical cohort.

Numbers of successful analyses: mean cell volume (n=153, 135, 144), transferrin saturation (n=153, 145, 148), anaemia (n=153, 140, 144).

## REFERENCES

1. Spencer PM. Controlled cord traction in management of the third stage of labour. *BMJ (Clinical research ed)* 1962;**1**:1728-32
2. Winter C, Macfarlane A, Deneux-Tharaux C, et al. Variations in policies for management of the third stage of labour and the immediate management of postpartum haemorrhage in Europe. *BJOG : an international journal of obstetrics and gynaecology* 2007;**114**(7):845-54 doi: 10.1111/j.1471-0528.2007.01377.x[published Online First: Epub Date]].
3. Yao AC, Moinian M, Lind J. Distribution of blood between infant and placenta after birth. *Lancet* 1969;**2**(7626):871-3
4. Mercer JS, Erickson-Owens DA. Rethinking placental transfusion and cord clamping issues. *J Perinat Neonatal Nurs* 2012;**26**(3):202-17; quiz 18-9 doi: 10.1097/JPN.0b013e31825d2d9a[published Online First: Epub Date]].
5. Hutton EK, Hassan ES. Late vs early clamping of the umbilical cord in full-term neonates: systematic review and meta-analysis of controlled trials. *JAMA : the journal of the American Medical Association* 2007;**297**(11):1241-52 doi: 10.1001/jama.297.11.1241[published Online First: Epub Date]].
6. Andersson O, Hellström-Westas L, Andersson D, et al. Effect of delayed versus early umbilical cord clamping on neonatal outcomes and iron status at 4 months: a randomised controlled trial. *BMJ (Clinical research ed)* 2011;**343**:d7157 doi: 10.1136/bmj.d7157[published Online First: Epub Date]].
7. Chaparro CM, Neufeld LM, Tena Alavez G, et al. Effect of timing of umbilical cord clamping on iron status in Mexican infants: a randomised controlled trial. *Lancet* 2006;**367**(9527):1997-2004 doi: 10.1016/s0140-6736(06)68889-2[published Online First: Epub Date]].
8. McDonald S, Middleton P, Dowswell T, et al. Effect of timing of umbilical cord clamping of term infants on maternal and neonatal outcomes. *Evid Based Child Health* 2014;**9**(2):303-97 doi: 10.1002/ebch.1971[published Online First: Epub Date]].
9. Oski F. Iron deficiency in infancy and childhood. *The New England journal of medicine* 1993;**329**(3)
10. Lozoff B, Beard J, Connor J, et al. Long-lasting neural and behavioral effects of iron deficiency in infancy. *Nutrition reviews* 2006;**64**(5 Pt 2):S34-43; discussion S72-91
11. Andersson O, Lindquist B, Lindgren M, et al. Effect of Delayed Cord Clamping on Neurodevelopment at 4 Years of Age: A Randomized Clinical Trial. *JAMA pediatrics* 2015;**169**(7):631-8 doi: 10.1001/jamapediatrics.2015.0358[published Online First: Epub Date]].
12. Berglund S, Westrup B, Hägglöf B, et al. Effects of iron supplementation of LBW infants on cognition and behavior at 3 years. *Pediatrics* 2013;**131**(1):47-55 doi: 10.1542/peds.2012-0989[published Online First: Epub Date]].
13. World Health Organization. Delayed clamping of the umbilical cord to reduce infant anaemia., 2014.
14. Bone Marrow Donors Worldwide. Published 2015. Secondary Bone Marrow Donors Worldwide. Published 2015. 2015. <http://www.bmdw.org/>.
15. Brunstein C, Setubal D, J W. Expanding the role of umbilical cord blood transplantation. *Br J Haematol* 2007;**137**(1):20-35 doi: 10.1111/j.1365-2141.2007.06521.x[published Online First: Epub Date]].
16. Frandberg S, Konar J, Rydberg L, Fasth A, Holgersson J. High quality cord blood banking is feasible with delayed clamping practices. The eight-year experience and current status of the national Swedish Cord Blood Bank. *Cell and tissue banking* 2016 doi: 10.1007/s10561-016-9565-6[published Online First: Epub Date]].
17. Domellöf M, Dewey K, Lönnerdal B, et al. The diagnostic criteria for iron deficiency in infants should be re-evaluated. *The Journal of nutrition* 2002;**132**(12)

18. Saarinen U, Siimes M. Developmental changes in serum iron, total iron-binding capacity, and transferrin saturation in infancy. *The Journal of Pediatrics* 1977;**91**(6):875-77
19. Venâncio SI, Levy RB, Saldiva SR, et al. [Effects of delayed cord clamping on hemoglobin and ferritin levels in infants at three months of age]. *Cad Saude Publica* 2008;**24**(2):323-31
20. Ceriani Cernadas JM, Carroli G, Pellegrini L, et al. [The effect of early and delayed umbilical cord clamping on ferritin levels in term infants at six months of life: a randomized, controlled trial]. *Arch Argent Pediatr* 2010;**108**(3):201-8 doi: 10.1590/s0325-00752010000300005[published Online First: Epub Date]].
21. Georgieff MK. Long-term brain and behavioral consequences of early iron deficiency. *Nutr Rev* 2011;**69 Suppl 1**:S43-8 doi: 10.1111/j.1753-4887.2011.00432.x[published Online First: Epub Date]].
22. Domellöf M, Lönnerdal B, Dewey K, et al. Sex differences in iron status during infancy. *Pediatrics* 2002;**110**(3):545-52

## FIGURE LEGENDS

**FIGURE 1.** Flow chart of the study populations.

**FIGURE 2.** Differences in infants' iron status at the age of 4 months according to sex in three groups divided according to umbilical cord clamping time. **A:** Geometric mean ferritin according to sex and time for umbilical cord clamping, **B:** Proportion of children with iron deficiency according to time for umbilical cord clamping and sex.

1  
2  
3  
4  
5  
6  
7  
8  
9  
10  
11  
12  
13  
14  
15  
16  
17  
18  
19  
20  
21  
22  
23  
24  
25  
26  
27  
28  
29  
30  
31  
32  
33  
34  
35  
36  
37  
38  
39  
40  
41  
42  
43  
44  
45  
46  
47  
48  
49  
50  
51  
52  
53  
54  
55  
56  
57  
58  
59  
60

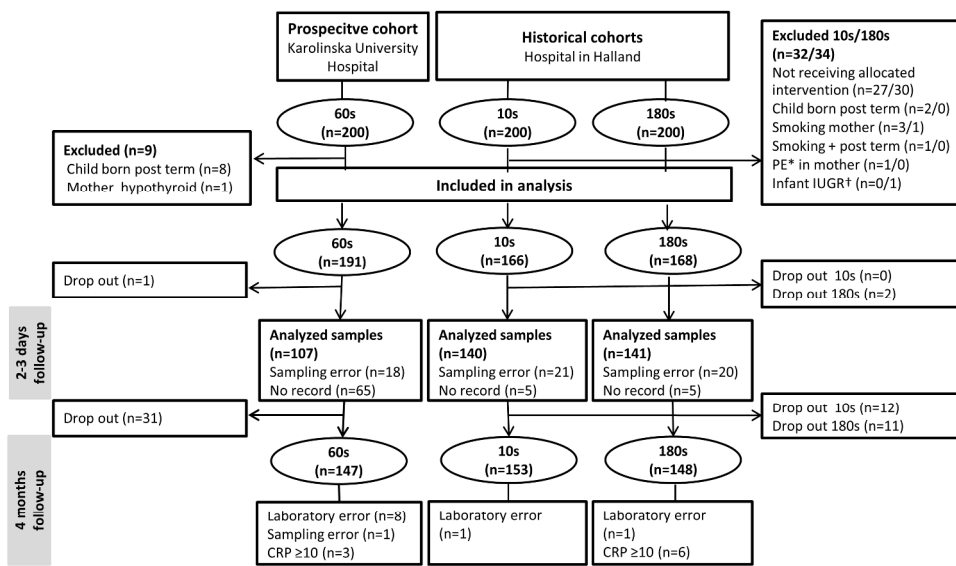

\*Pre-eclampsia  
†Intrauterine growth retardation

FIGURE 1. Flow chart of the study populations.

254x190mm (300 x 300 DPI)

ew only



FIGURE 2. Differences in infants' iron status at the age of 4 months according to sex in three groups divided according to umbilical cord clamping time. A: Geometric mean ferritin according to sex and time for umbilical cord clamping, B: Proportion of children with iron deficiency according to time for umbilical cord clamping and sex.

254x190mm (300 x 300 DPI)

STROBE 2007 (v4) Statement—Checklist of items that should be included in reports of *cohort studies*

| Section/Topic                | Item # | Recommendation                                                                                                                                                                       | Reported on page # |
|------------------------------|--------|--------------------------------------------------------------------------------------------------------------------------------------------------------------------------------------|--------------------|
| Title and abstract           | 1      | (a) Indicate the study's design with a commonly used term in the title or the abstract                                                                                               | 1, 2               |
|                              |        | (b) Provide in the abstract an informative and balanced summary of what was done and what was found                                                                                  | 2                  |
| <b>Introduction</b>          |        |                                                                                                                                                                                      |                    |
| Background/rationale         | 2      | Explain the scientific background and rationale for the investigation being reported                                                                                                 | 3                  |
| Objectives                   | 3      | State specific objectives, including any prespecified hypotheses                                                                                                                     | 3                  |
| <b>Methods</b>               |        |                                                                                                                                                                                      |                    |
| Study design                 | 4      | Present key elements of study design early in the paper                                                                                                                              | 4                  |
| Setting                      | 5      | Describe the setting, locations, and relevant dates, including periods of recruitment, exposure, follow-up, and data collection                                                      | 4                  |
| Participants                 | 6      | (a) Give the eligibility criteria, and the sources and methods of selection of participants. Describe methods of follow-up                                                           | 4, 5               |
|                              |        | (b) For matched studies, give matching criteria and number of exposed and unexposed                                                                                                  | Not applicable     |
| Variables                    | 7      | Clearly define all outcomes, exposures, predictors, potential confounders, and effect modifiers. Give diagnostic criteria, if applicable                                             | 4, 5               |
| Data sources/<br>measurement | 8*     | For each variable of interest, give sources of data and details of methods of assessment (measurement). Describe comparability of assessment methods if there is more than one group | 5, 6               |
| Bias                         | 9      | Describe any efforts to address potential sources of bias                                                                                                                            | 6, 10              |
| Study size                   | 10     | Explain how the study size was arrived at                                                                                                                                            | 4, 5               |
| Quantitative variables       | 11     | Explain how quantitative variables were handled in the analyses. If applicable, describe which groupings were chosen and why                                                         |                    |
| Statistical methods          | 12     | (a) Describe all statistical methods, including those used to control for confounding                                                                                                | 6                  |
|                              |        | (b) Describe any methods used to examine subgroups and interactions                                                                                                                  | Not applicable     |
|                              |        | (c) Explain how missing data were addressed                                                                                                                                          | 6, 7               |
|                              |        | (d) If applicable, explain how loss to follow-up was addressed                                                                                                                       | 6, 7               |
|                              |        | (e) Describe any sensitivity analyses                                                                                                                                                | Not applicable     |
| <b>Results</b>               |        |                                                                                                                                                                                      |                    |

|                          |     |                                                                                                                                                                                                              |                |
|--------------------------|-----|--------------------------------------------------------------------------------------------------------------------------------------------------------------------------------------------------------------|----------------|
| Participants             | 13* | (a) Report numbers of individuals at each stage of study—eg numbers potentially eligible, examined for eligibility, confirmed eligible, included in the study, completing follow-up, and analysed            | Fig 1, 6, 7    |
|                          |     | (b) Give reasons for non-participation at each stage                                                                                                                                                         | Fig 1          |
|                          |     | (c) Consider use of a flow diagram                                                                                                                                                                           | Fig 1          |
| Descriptive data         | 14* | (a) Give characteristics of study participants (eg demographic, clinical, social) and information on exposures and potential confounders                                                                     | 4, 5           |
|                          |     | (b) Indicate number of participants with missing data for each variable of interest                                                                                                                          | Tables 1-4     |
|                          |     | (c) Summarise follow-up time (eg, average and total amount)                                                                                                                                                  | 7              |
| Outcome data             | 15* | Report numbers of outcome events or summary measures over time                                                                                                                                               | Not applicable |
| Main results             | 16  | (a) Give unadjusted estimates and, if applicable, confounder-adjusted estimates and their precision (eg, 95% confidence interval). Make clear which confounders were adjusted for and why they were included | 7              |
|                          |     | (b) Report category boundaries when continuous variables were categorized                                                                                                                                    | Not applicable |
|                          |     | (c) If relevant, consider translating estimates of relative risk into absolute risk for a meaningful time period                                                                                             | Not applicable |
| Other analyses           | 17  | Report other analyses done—eg analyses of subgroups and interactions, and sensitivity analyses                                                                                                               | Fig 2          |
| <b>Discussion</b>        |     |                                                                                                                                                                                                              |                |
| Key results              | 18  | Summarise key results with reference to study objectives                                                                                                                                                     | 9              |
| <b>Limitations</b>       |     |                                                                                                                                                                                                              |                |
| Interpretation           | 20  | Give a cautious overall interpretation of results considering objectives, limitations, multiplicity of analyses, results from similar studies, and other relevant evidence                                   | 9, 11          |
| Generalisability         | 21  | Discuss the generalisability (external validity) of the study results                                                                                                                                        | 9, 10          |
| <b>Other information</b> |     |                                                                                                                                                                                                              |                |
| Funding                  | 22  | Give the source of funding and the role of the funders for the present study and, if applicable, for the original study on which the present article is based                                                | 1              |

\*Give information separately for cases and controls in case-control studies and, if applicable, for exposed and unexposed groups in cohort and cross-sectional studies.

**Note:** An Explanation and Elaboration article discusses each checklist item and gives methodological background and published examples of transparent reporting. The STROBE checklist is best used in conjunction with this article (freely available on the Web sites of PLoS Medicine at <http://www.plosmedicine.org/>, Annals of Internal Medicine at <http://www.annals.org/>, and Epidemiology at <http://www.epidem.com/>). Information on the STROBE Initiative is available at [www.strobe-statement.org](http://www.strobe-statement.org).



# BMJ Open

## Wait a minute? An observational cohort study comparing iron stores in healthy Swedish infants at four months of age after 10, 60 and 180 seconds' umbilical cord clamping

|                                 |                                                                                                                                                                                                                                                                                                                                                                                                                                                                                                                                                                                                                                                                                                                                                                                                                                                                                                                                                                                                                                                                                                                                                                                                                                                                                                                                                                                                                                                                                                                          |
|---------------------------------|--------------------------------------------------------------------------------------------------------------------------------------------------------------------------------------------------------------------------------------------------------------------------------------------------------------------------------------------------------------------------------------------------------------------------------------------------------------------------------------------------------------------------------------------------------------------------------------------------------------------------------------------------------------------------------------------------------------------------------------------------------------------------------------------------------------------------------------------------------------------------------------------------------------------------------------------------------------------------------------------------------------------------------------------------------------------------------------------------------------------------------------------------------------------------------------------------------------------------------------------------------------------------------------------------------------------------------------------------------------------------------------------------------------------------------------------------------------------------------------------------------------------------|
| Journal:                        | <i>BMJ Open</i>                                                                                                                                                                                                                                                                                                                                                                                                                                                                                                                                                                                                                                                                                                                                                                                                                                                                                                                                                                                                                                                                                                                                                                                                                                                                                                                                                                                                                                                                                                          |
| Manuscript ID                   | bmjopen-2017-017215.R4                                                                                                                                                                                                                                                                                                                                                                                                                                                                                                                                                                                                                                                                                                                                                                                                                                                                                                                                                                                                                                                                                                                                                                                                                                                                                                                                                                                                                                                                                                   |
| Article Type:                   | Research                                                                                                                                                                                                                                                                                                                                                                                                                                                                                                                                                                                                                                                                                                                                                                                                                                                                                                                                                                                                                                                                                                                                                                                                                                                                                                                                                                                                                                                                                                                 |
| Date Submitted by the Author:   | 31-Oct-2017                                                                                                                                                                                                                                                                                                                                                                                                                                                                                                                                                                                                                                                                                                                                                                                                                                                                                                                                                                                                                                                                                                                                                                                                                                                                                                                                                                                                                                                                                                              |
| Complete List of Authors:       | <p>Askelöf, Ulrica; Dept of Clinical Science, Intervention and Technology , Division of Obstetrics and Gynecology, Karolinska Institutet; The Swedish National Umbilical Cord Blood Bank, Sahlgrenska University Hospital</p> <p>Andersson, Ola; Uppsala Universitet, Womens and Childrens health; Hallands sjukhus Halmstad, Research and Development</p> <p>Domellöf, Magnus; Umea University, Department of Clinical Sciences, Pediatrics</p> <p>Fasth, Anders; Goteborgs Universitet; The Swedish National Umbilical Cord Blood Bank, Sahlgrenska University Hospital</p> <p>Hallberg, Boubou; Karolinska Hospital and Karolinska Institutet, Neonatology &amp; CLINTEC</p> <p>Hellström-Westas, Lena; Uppsala Universitet, Women's and Children's Health</p> <p>Pettersson, Karin; Department of Clinical Science, Intervention and Technology, Division of Obstetrics and Gynecology, Karolinska Institutet; The Swedish National Umbilical Cord Blood Bank, Sahlgrenska University Hospital</p> <p>Westgren, Magnus; Department of Clinical Science, Intervention and Technology, Karolinska Institute; The Swedish National Umbilical Cord Blood Bank, Sahlgrenska University Hospital</p> <p>Wiklund, Ingela E ; Department of Clinical Sciences, Danderyd Hospital</p> <p>Götherström, Cecilia; Department of Clinical Science, Intervention and Technology, Division of Obstetrics and Gynecology, Karolinska Institutet; The Swedish National Umbilical Cord Blood Bank, Sahlgrenska University Hospital</p> |
| <b>Primary Subject Heading</b>: | Obstetrics and gynaecology                                                                                                                                                                                                                                                                                                                                                                                                                                                                                                                                                                                                                                                                                                                                                                                                                                                                                                                                                                                                                                                                                                                                                                                                                                                                                                                                                                                                                                                                                               |
| Secondary Subject Heading:      | Paediatrics, Haematology (incl blood transfusion)                                                                                                                                                                                                                                                                                                                                                                                                                                                                                                                                                                                                                                                                                                                                                                                                                                                                                                                                                                                                                                                                                                                                                                                                                                                                                                                                                                                                                                                                        |
| Keywords:                       | PAEDIATRICS, UMBILICAL CORD CLAMPING, IRON DEFICIENCY, Fetal medicine < OBSTETRICS                                                                                                                                                                                                                                                                                                                                                                                                                                                                                                                                                                                                                                                                                                                                                                                                                                                                                                                                                                                                                                                                                                                                                                                                                                                                                                                                                                                                                                       |
|                                 |                                                                                                                                                                                                                                                                                                                                                                                                                                                                                                                                                                                                                                                                                                                                                                                                                                                                                                                                                                                                                                                                                                                                                                                                                                                                                                                                                                                                                                                                                                                          |

1  
2  
3  
4  
5  
6  
7  
8  
9  
10  
11  
12  
13  
14  
15  
16  
17  
18  
19  
20  
21  
22  
23  
24  
25  
26  
27  
28  
29  
30  
31  
32  
33  
34  
35  
36  
37  
38  
39  
40  
41  
42  
43  
44  
45  
46  
47  
48  
49  
50  
51  
52  
53  
54  
55  
56  
57  
58  
59  
60

For peer review only

1  
2  
3 **Wait a minute? An observational cohort study comparing iron stores in healthy Swedish infants at**  
4 **four months of age after 10, 60 and 180 seconds' umbilical cord clamping**  
5  
6  
7

8 Ulrica Askelöf, RNM<sup>a,g</sup>, Ola Andersson, MD, PhD<sup>b</sup>, Magnus Domellöf, MD, Prof<sup>c</sup>, Anders Fasth, MD,  
9 Prof<sup>d,g</sup>, Boubou Hallberg, MD, PhD<sup>h</sup>, Lena Hellström-Westas, MD, Prof<sup>b</sup>, Karin Pettersson, MD,  
10 Associate Prof<sup>a,g</sup>, Magnus Westgren, MD, Prof<sup>a,g</sup>, Ingela Wiklund, RNM, Associate Prof<sup>e</sup>, Cecilia  
11 Götherström, Associate Prof<sup>a,f,g</sup>  
12  
13

14 **Affiliations:** <sup>a</sup>Department of Clinical Science, Intervention and Technology, Division of Obstetrics and  
15 Gynecology, Karolinska Institutet, Stockholm, Sweden; <sup>b</sup>Department of Women's and Children's  
16 Health, Uppsala University, Uppsala, Sweden; <sup>c</sup>Department of Clinical Sciences, Pediatrics, Umeå  
17 University, Umeå, Sweden; <sup>d</sup>Department of Pediatrics, Institution of Clinical Sciences, University of  
18 Gothenburg, Gothenburg, Sweden; <sup>e</sup>Department of Clinical Sciences, Danderyd Hospital, Stockholm,  
19 Sweden and <sup>f</sup>Center for Hematology and Regenerative Medicine, Karolinska Institutet, Stockholm,  
20 Sweden; <sup>g</sup>The Swedish National Umbilical Cord Blood Bank, Sahlgrenska University Hospital,  
21 Gothenburg, Sweden; <sup>h</sup>Department of Neonatology, CLINTEC, Karolinska Institutet and University  
22 Hospital, Stockholm, Sweden.  
23  
24  
25

26 **Corresponding author:** Associate Prof Cecilia Götherström at Cecilia.gotherstrom@ki.se  
27

28 **Funding Source:** The prospective part of the study was supported by The Swedish Childhood Cancer  
29 Foundation; The regional agreement on medical training and clinical research (ALF) at Karolinska  
30 Institutet and at Sahlgrenska University Hospital and The Dr Åke Olsson Foundation for  
31 Hematological Research, Stockholm. The RCT that provided data for the historical cohorts was  
32 supported by Regional Scientific Council of Halland; the HASNA Foundation, Halmstad; HRH Crown  
33 Princess Lovisa's Foundation for Child Care, Stockholm; and the Framework of Positive Scientific  
34 Culture, Hospital of Halland, Halmstad. The funders were not involved in the study design, data  
35 analysis, or manuscript preparation.  
36  
37  
38

39 **Financial Disclosure:** The authors have no financial relationships relevant to this article to disclose.

40 **Conflict of Interest:** The authors have no conflicts of interest relevant to this article to disclose.

41 **Data Sharing Statement:** There are no other unpublished data available.  
42

43 **Clinical Trial Registration:** Clinicaltrial.gov NCT01245296.  
44

45 **Ethics Approval:** By the Regional Ethical Review Board in Stockholm (2011/2142-31/3) and the  
46 Regional Ethical Review Board at Lund University (41/2008).  
47

48 **Abbreviations:** ANOVA- analysis of variance, CI – confidence interval, CRP – C reactive protein, ID -  
49 iron deficiency, MCV - mean cell volume, NS – non significant, RCT - randomized controlled trial, s –  
50 seconds, SD – standard deviation, UC – umbilical cord, UCB – umbilical cord blood.  
51  
52  
53  
54  
55  
56  
57  
58  
59  
60

## Abstract

**BACKGROUND AND OBJECTIVE:** Umbilical cord blood (UCB) is a valuable stem cell source used for transplantation. Immediate umbilical cord (UC) clamping is widely practiced but delayed UC clamping is increasingly advocated to reduce possible infant anaemia. The aim of this study was to investigate an intermediate UC clamping time point and to evaluate iron status at the age of four months in infants who had the UC clamped after 60 seconds (s) and compare the results to immediate and late UC clamping.

**DESIGN:** Prospective observational study with two historical controls.

**SETTING:** A university hospital in Stockholm, Sweden and a county hospital in Halland, Sweden.

**METHOD:** Iron status was assessed at four months in 200 prospectively recruited term infants whose UC was clamped 60s after birth. The new-born baby was held below the uterine level for the first 30s before placing the infant on the mother's abdomen for additional 30s. The results were compared to data from a previously conducted randomized controlled trial including infants subjected to UC clamping at  $\leq 10$ s (n=200) or  $\geq 180$ s (n=200) after delivery.

**RESULTS:** After adjustment for age differences at the time of follow-up, serum ferritin concentrations were 77  $\mu\text{g/L}$ , 103  $\mu\text{g/L}$  and 114  $\mu\text{g/L}$  in the 10s, 60s and 180s groups, respectively. The adjusted ferritin concentration was significantly higher in the 60s group compared to the 10s group ( $P=0.002$ ) while the difference between the 60s and 180s groups was not significant ( $P=0.29$ ).

**CONCLUSION:** In this study of healthy term infants, 60s UC clamping with 30s lowering of the baby below the uterine level, resulted in higher serum ferritin concentrations at four months compared to 10s UC clamping. The results suggest that delaying the UC clamping for 60s reduces the risk for iron deficiency.

### Strengths and limitations of the study

- This study compares iron- and blood status at the age of four months in children whose UC were clamped after 60s with children whose UC were clamped  $\leq 10$ s or  $\geq 180$ s.
- In this study we focus on potential consequences for the child caused by different UC clamping times, and not the quality of the collected UCB.
- This prospective observational study uses historical controls and results should be interpreted with caution because of potential confounding bias.
- We did not use a non-inferiority approach for this study since we aimed to compare results after 60s UC clamping with both 10s- and 180s UC clamping.

## INTRODUCTION

During the last decades, immediate the umbilical cord (UC) clamping has been part of active management of labour with the aim to reduce maternal haemorrhage at birth [1, 2]. Hence, the placenta and umbilical cord blood (UCB), have been regarded as waste products following birth. However, immediate UC clamping may deprive infants of up to one third of the total fetoplacental blood volume [3, 4], and increase the risk of iron deficiency (ID) in the first 3-6 months of life [5-9]. Iron deficiency is associated with impaired neurodevelopment affecting cognitive, motor, and behavioural skills in young children [10-12]. For this reason the World Health Organization recommends delayed UC clamping for 1-3 minutes after birth [13].

On the other side, UCB is a valuable stem cell source for the 30-50% of patients that need a hematopoietic stem cell transplantation, but who lack a suitable family or public registry donor [14, 15]. Therefore, UCB is collected and stored in altruistic and private UCB banks. The earlier the UC is clamped, the more blood is left to collect from the placenta and for this reason immediate UC clamping is normally practiced in UCB collection. More than 35.000 transplantations with UCB have been performed worldwide [14].

We hypothesized that if the UC is clamped at 60 seconds (s) after birth, a sufficient amount of blood will have passed from the placenta to the infant to reduce the risk of ID and anaemia while still allowing collection of UCB for banking [16]. The objective of the current study was to evaluate iron status and complete blood counts at the age of four months in infants who had the UC clamped after 60s and compare the results to immediate ( $\leq 10$ s) and late ( $\geq 180$ s) UC clamping. In this study we focused on potential consequences for the donors only.

## MATERIALS AND METHODS

We performed an observational cohort study using one prospective clinical cohort and data from a previously performed randomized controlled trial (RCT) [6]. The prospectively recruited infants were born at Karolinska University Hospital Huddinge, Sweden between April 2012 and May 2015, to parents who agreed to donate UCB to the Swedish National Umbilical Cord Blood Bank, a public bank without profit interest. The UC was clamped after  $60 \pm 10$ s. The new-born baby was held below the uterine level for the first 30s before placing the infant on the mother's abdomen for additional 30s. The historical cohorts consisted of data from infants who were randomized to immediate (within 10s after birth) or late (after 180s) UC clamping, respectively, in a trial conducted by three of the co-authors at the Hospital of Halland in Halmstad, Sweden between April 2008 and September 2009 [6].

### Outcome measures

The primary outcome variable was ferritin as a measure of iron stores, at the age of four months and secondary outcomes included haemoglobin, transferrin saturation, soluble transferrin receptors, mean cell volume (MCV) as well as ID (defined as  $\geq 2$  iron indicators outside reference range with the following cut-off values: ferritin  $< 20 \mu\text{g/L}$ , [17] MCV  $< 73 \text{ fL}$ , [17] transferrin saturation  $< 10\%$  [18] and transferrin receptor  $> 7 \text{ mg/L}$  [6]). Since ferritin is an acute phase reactant, C reactive protein (CRP) was analysed in order to exclude falsely elevated ferritin measurements. The infant's dietary habits at four months were also considered as well as the relevance of infant sex for iron and blood status at that age.

### Sample size

A formal power calculation was not performed for the current study but the sample size was based on the group size in the original RCT by Andersson *et al.* 2011 (the historical cohorts) [6]. The power calculation by Andersson *et al.* showed that a group size of 200 would enable detection of a 29% difference in geometric mean serum ferritin between 10s and 180s UC clamping with a power of 80% and a significance level of 0.05, assuming a mean serum ferritin concentration of  $110 \mu\text{g/L}$  in the 180s-group while allowing an attrition of 25% [6]. Based on the results from Andersson *et al.*,

1  
2  
3 demonstrating a 45% difference in ferritin concentration between 10s and 180s UC clamping, we  
4  
5 decided to include 200 children also in the prospective group.  
6

### 7 **Study population and inclusion criteria**

8  
9 The same inclusion criteria applied for the prospective and historical cohorts: healthy mother,  
10  
11 normal, singleton pregnancy, gestational age 37+0 to 41+6 weeks and planned vaginal delivery with  
12  
13 cephalic presentation [6]. The mother also had to understand Swedish well enough to consent  
14  
15 participation in the study. In the prospectively recruited cohort, parents also had to agree to altruistic  
16  
17 donation of UCB, and to the modified UC clamping strategy. Exclusion criteria were also the same in  
18  
19 the three groups: smoking mother, serious congenital malformations, syndromes, or other congenial  
20  
21 diseases that could affect the outcome measures. For this study, we only included data from the RCT  
22  
23 that were handled according to per protocol, as compared to the analysis by intention to treat in the  
24  
25 original RCT [6]. Moreover, like the RCT, we only included children with CRP<10 in the analysis. All  
26  
27 parents donating UCB at Karolinska University Hospital Huddinge that met the inclusion criteria were  
28  
29 offered to participate in the study upon arrival at the delivery unit. Midwives were instructed to  
30  
31 clamp the UC 60s after birth in deliveries where parents had consented to participate in the study.  
32  
33 Staff in charge of collection of UCB measured the exact timing of UC clamping using a digital timer.  
34  
35 Only children whose UC were clamped at 60 ±10s were included in the study. Oral and written  
36  
37 informed consent was obtained from one or both of the parents. The study was approved by the  
38  
39 regional ethical review board in Stockholm (2011/2142-31/3) and the RCT was approved by the  
40  
41 regional ethical review board at Lund University (41/2008).  
42  
43  
44  
45

### 46 **Data collection and blood samples**

47  
48 Midwives were instructed to hold the new-born baby below the uterine level for the first 30s before  
49  
50 placing the infant on the mother's abdomen, in accordance with the study by Andersson *et al.* 2011  
51  
52 [6]. The UC clamping technique used in the prospectively recruited cohort was similar to the  
53  
54 historical groups except for the timing. Venous blood samples were analysed at birth from the UC, at  
55  
56 two to three days of age in connection with metabolic screening and at four months (±21 days) at a  
57  
58  
59  
60

1  
2  
3 scheduled follow-up visit. At birth and at four months, serum ferritin, haemoglobin, haematocrit,  
4  
5 MCV, reticulocyte count, transferrin saturation, transferrin receptor and CRP were analysed and at  
6  
7 two to three days of age we analysed haemoglobin, haematocrit and bilirubin. EDTA tubes were used  
8  
9 for blood count and serum separator tubes for iron status, bilirubin and CRP (Microvette, Sarstedt AG  
10  
11 & Co, Nümbrecht, Germany). Blood status was analysed using equal methods and equipment in both  
12  
13 the laboratory at Karolinska University Hospital (Sysmex XE5000, Sysmex, Kobe, Japan) and at the  
14  
15 Hospital of Halland (Sysmex XE2100, Sysmex, Kobe, Japan). Analysis of iron status and CRP could be  
16  
17 performed at the same laboratory as in the RCT [6], and therefore the blood samples collected at  
18  
19 Karolinska University Hospital were centrifuged and the serum kept at -70 degrees Celsius before  
20  
21 sent for analysis at the Clinical Chemistry Laboratory at the Hospital of Halland. The samples were  
22  
23 then thawed and analysed using a Cobas 6000 (Roche Diagnostics, Basel, Switzerland), the same  
24  
25 method as in the RCT [6].  
26  
27

### 28 **Statistical analysis**

29  
30 Analyses on the two historical cohorts, 10s and 180s, were calculated only on infants receiving  
31  
32 intervention per protocol in order to obtain clearly defined groups according to time of UC clamping.  
33  
34 Baseline characteristics were compared across groups using analysis of variance (ANOVA). Means of  
35  
36 outcome measures in the three cohorts were compared using the Bonferroni method. We also  
37  
38 performed pairwise comparisons (60s vs 10s and 60s vs 180s) using Student's t-test for variables with  
39  
40 normal distribution that were statistically significant in the Bonferroni analyses. Ferritin  
41  
42 concentration was log<sub>10</sub> transformed for analysis because of skewed distribution and the results  
43  
44 were presented as geometric means. Categorical variables were compared between groups using  
45  
46 Fisher's Exact test for pairwise comparisons. Adjusted group means were compared using ANOVA  
47  
48 and a binary logistic regression model was used to adjust for sex and age in the evaluation of ID at  
49  
50 four months. A P-value less than 0.05 were considered significant. No imputation of missing data was  
51  
52 performed. Loss to follow-up was registered, but not examined further. IBM SPSS for Windows,  
53  
54 version 22 was used for the analyses.  
55  
56  
57  
58  
59  
60



## RESULTS

Of the 200 prospectively recruited infants, 191 were included in the analysis as compared to 166 in the 10s and 168 in the 180s groups. Infants lost to follow up or excluded due to not fulfilling inclusion criteria are shown in Fig 1.

### Baseline data

There were no significant differences in the 60s group as compared to the 10s and 180s groups with regard to maternal or neonatal characteristics. The 10s group had higher UC haemoglobin (163 vs 153 g/L,  $P<0.001$ ) and higher UC haematocrit (48.7 vs 47.0%,  $P=0.005$ ) than the 60s group. There were no significant differences between the 60s and the 180s groups (Table 1).

### Two to three day-follow-up

At two to three days, blood samples were obtained from 140 infants in the 10s group, 107 in the 60s group, and 141 in the 180s group (Figure 1). The prevalence of anaemia was higher in the 10s compared to the 60s and 180s groups (9 (6.4%), 2 (1.9%) and 2 (1.4%)) respectively ( $P=0.04$ ).

Haemoglobin was lower in the 10s and 60s groups compared to the 180s group; 175, 180 and 189 g/L respectively ( $P=0.001$  for 60s vs 180s). Bilirubin did not differ between the groups. Anaemic children were referred for further diagnostics but none needed treatment.

### Primary outcome

In total 468 (78%) infants had follow up at four months (children excluded or lost to follow up are shown in Figure 1). In the 60s group, the infants ( $n=147$ ) were four days older than the historical groups from the RCT ( $126\pm 7$  days vs  $122\pm 6$  days,  $P<0.001$ ). The geometric mean ferritin levels were 80, 96 and 117  $\mu\text{g/L}$  respectively in the 10s, 60s and 180s groups ( $P=0.052$  for 10s vs 60s;  $P=0.02$  for 60s vs 180s) (Table 2). After adjustment for the age difference, the geometric means were 77, 103 and 114  $\mu\text{g/L}$  respectively ( $P=0.002$  for 10s vs 60s;  $P=0.29$  for 60s vs 180s) (Table 3).

### Secondary outcomes

All secondary outcome variables are shown in Table 2. Haemoglobin levels at four months were higher in the 60s group compared to 10s and 180s, but the difference did not remain in the age

1  
2  
3 adjusted model (Table 3). There were no statistically significant differences in the prevalence of  
4  
5 anaemia in the 60s group as compared to the other two groups (Table 4). After adjustment for age at  
6  
7 the time of follow-up, there were no differences between the 10s and 60s groups in haematocrit,  
8  
9 MCV, reticulocyte count, transferrin receptor or transferrin saturation. The 60s group had  
10  
11 significantly lower adjusted MCV and higher adjusted transferrin receptor compared to the 180s  
12  
13 group, but there were no differences in haematocrit, reticulocyte count or transferrin saturation  
14  
15 (Table 3). The prevalence of ID was 8 (5.2%), 7 (4.8%) and 1 (0.7%) respectively in the 10s, 60s and  
16  
17 180s groups ( $P>0.99$  for 10s vs 60s and  $P=0.04$  for 60s vs 180s) (Table 4). After statistical adjustments  
18  
19 for sex and age at the time of follow-up, the prevalence of ID did not differ between the 60s group  
20  
21 and the two other groups. The proportion of infants that were exclusively breast fed at four months  
22  
23 did not differ between the groups (79 (52%), 92 (58%) and 89 (56%) respectively in the 10s, 60s and  
24  
25 180s groups. The impact of exclusive breast feeding on ferritin concentration and ID were further  
26  
27 assessed in an adjusted model but no correlation was found (data not shown).  
28  
29

### 30 31 **Sex differences**

32  
33 Iron and blood status at four months were further assessed by analysing differences according to  
34  
35 infant sex. When data from the three cohorts were analysed together, geometric mean ferritin was  
36  
37 lower in boys than in girls and ID was more prevalent amongst boys (Fig 2A and 2B). Haemoglobin  
38  
39 concentrations did not differ significantly between boys and girls and neither did the prevalence of  
40  
41 anaemia (data not shown).  
42  
43

### 44 45 **DISCUSSION**

46  
47 We compared infants' iron and blood status at the age of four months after three different UC  
48  
49 clamping time intervals (60s versus  $\leq 10$ s, and  $\geq 180$ s, respectively). Previous studies have compared  
50  
51 immediate and late UC clamping but the definition of "late" in these studies varies from 60s to 180s  
52  
53 or after birth of the placenta [5, 7, 8]. The current study evaluates an intermediate UC clamping  
54  
55 strategy that can be used in connection with altruistic donation of UCB for clinical banking. When  
56  
57 asking parents to donate their child's UCB for the potential good of others, it is essential to inform of  
58  
59

1  
2  
3 possible consequences for the child. We demonstrated that after adjustment for age difference at  
4  
5 the time of follow-up, there were no statistically significant differences in ferritin concentration  
6  
7 between the 60s and 180s groups but the 60s group had significantly higher ferritin concentrations  
8  
9 compared to 10s. The main reason for the effect of age on ferritin during infancy is rapid growth  
10  
11 which leads to a rapidly expanding blood volume and depletion of iron stores [9].  
12

13  
14 Results from the present study are in accordance with a Brazilian RCT that demonstrated higher  
15  
16 ferritin concentration at the age of three months in children whose UC were clamped after 60s  
17  
18 compared to immediate UC clamping [19]. However, our findings are in contrast to a study by  
19  
20 Cernadas *et al.*, who reported no differences in ferritin six months after birth comparing 15s and 60s  
21  
22 UC clamping. The difference in ferritin between the 60s and 180s groups were not presented [20].  
23  
24 The present study indicates that a 60s delay before UC clamping results in a mean serum ferritin at 4  
25  
26 months of age corresponding to 90% of the mean ferritin after 180s UC clamping.  
27

28  
29 In the current study, children in the 60s group had the lowest haemoglobin of all three groups at  
30  
31 birth (10s 163 g/L, 60s 153 g/L, 180s 158 g/L) but at four months, there were no longer any  
32  
33 differences between the groups in our adjusted model. The original RCT as well as a Cochrane report  
34  
35 found higher concentrations of haemoglobin after immediate than late UC clamping at birth [6, 8]. As  
36  
37 speculated in a previous publication, this difference may not reflect true difference in haemoglobin  
38  
39 but could be a result of trans endothelial plasma leakage in the UC after UC clamping [6].  
40

41  
42 The prevalence of ID was higher in the 10s and 60s groups compared to the 180s group. However,  
43  
44 when adjusting for sex and age at the time of follow-up, there were no longer any statistically  
45  
46 significant differences between the three groups. In accordance with previous studies on ID in  
47  
48 infancy, we found that at four months, boys had significantly lower geometric mean ferritin and  
49  
50 more often ID than girls [21, 22]. Nevertheless, the aim of the study was not to compare differences  
51  
52 according to sex, and the groups were therefore too small to draw any reliable conclusions of sex and  
53  
54 ID. It has been suggested that the differences in iron status between the two sexes may be hormone-  
55  
56 related but it is also influenced by genetic factors, which may differ in populations with different  
57  
58  
59  
60

1  
2  
3 ethnicity [22]. Also, when considering the generalisability of this study, readers should bear in mind  
4  
5 that all children were placed below the uterine level for 30s directly after birth. This may be in  
6  
7 contrast to the practice in other delivery settings, where the children are often placed directly on the  
8  
9 woman's abdomen, which may affect the speed of the placental transfusion.  
10

### 11 **Limitations of the study**

12  
13 A limitation of this study is that we have no record of the parents' ethnic or socio-economic  
14  
15 background, or no measure of adequacy of samples for donation, and we were therefore unable to  
16  
17 draw any conclusions on possible impact of these factors. When comparing different interventions,  
18  
19 RCTs are regarded as the golden standard. However, randomization into 10s UC clamping for this  
20  
21 study was considered unethical since there is evidence that children benefit from prolonged  
22  
23 placental transfusion for at least 60s, and the clinical routine in Sweden is to wait 180s before UC  
24  
25 clamping in normal deliveries. We used the historical cohorts from the RCT in Halmstad, Sweden as  
26  
27 controls in this study. The prospectively recruited cohort (60s) is from a large birth clinic in  
28  
29 Stockholm, Sweden while the controls are from a smaller town where the participants were recruited  
30  
31 two to five years earlier. Although the inclusion criteria were the same and pregnant mothers in  
32  
33 Sweden follow the same well-controlled antenatal program and the baseline data showed no  
34  
35 significant differences in maternal or infant characteristics, it is difficult to know if the study  
36  
37 populations are homogenous. We did not use a non-inferiority approach for this study since we  
38  
39 aimed to compare results after 60s UC clamping with 10s and 180s. Nor did we perform a power  
40  
41 calculation when designing the study, but included an equally large group as the two historical  
42  
43 groups. This is a weakness which, should be taken into consideration. We have taken measures to  
44  
45 avoid systematic biases caused by differences in laboratory routines between the two hospitals by  
46  
47 using the same laboratory for analysing the iron status variables as well as CRP.  
48  
49  
50

51  
52 Collection of UCB for transplantation is a growing and life-saving practice. Tens of thousands UCB  
53  
54 units are altruistically donated and stored for public use each year, and as a result new-borns are  
55  
56 exposed to limited UC clamping time. The idea that UCB left in the placenta after birth is a mere  
57  
58  
59  
60

1  
2  
3 waste that is thrown away if not collected is obsolete. Optimizing UC clamping time and investigating  
4  
5 the clinical significance to minimize risks for the infant while still enabling collection of UCB for  
6  
7 transplantation is a great, but necessary, challenge. A study evaluating volume and TNC in UCB units  
8  
9 collected at the Swedish National Umbilical Cord Blood Bank showed that 37 % of units collected  
10  
11 after 60s UC clamping met the banking criteria compared to 47 % after immediate UC clamping [16].  
12  
13 This is information prospective parents considering donating UCB should receive.  
14  
15

## 16 17 **CONCLUSION**

18  
19 In this observational study, significantly more children in the 10s UC clamping group had low iron  
20  
21 stores at four months compared to children in the 60s and 180s UC clamping groups. After  
22  
23 adjustment for age and sex, there were no statistically significant differences in ferritin concentration  
24  
25 between 60 and 180s UC clamping. 60s UC clamping is therefore preferable to immediate UC  
26  
27 clamping. Delaying UC clamping may be more important in boys than in girls to avoid ID in early  
28  
29 childhood. Larger studies with long term follow-up is needed to establish the clinical relevance of  
30  
31 different UC clamping strategies.  
32  
33

## 34 35 **CONTRIBUTORS**

36  
37 Dr C. Götherström conceptualized and designed the study, analyzed data, critically revised and  
38  
39 approved the final manuscript as submitted. Mrs U. Askelöf conceptualized and designed the study,  
40  
41 carried out all data collection in the prospective cohort, carried out all analyses, drafted the initial  
42  
43 manuscript, and approved the final manuscript as submitted. Dr O. Andersson designed the data  
44  
45 collection instruments, contributed to the study design and provided data for the historical cohorts.  
46  
47 He also carried out the initial analyses, critically reviewed and revised the manuscript, and approved  
48  
49 the final manuscript as submitted. Profs M. Domellöf, A. Fasth, L. Hellström-Westas, M. Westgren,  
50  
51 Associate Profs K. Pettersson and I. Wiklund and Dr B. Hallberg participated in the study design,  
52  
53 reviewed and revised the manuscript and approved the final manuscript as submitted.  
54  
55  
56  
57  
58  
59  
60

**ACKNOWLEDGEMENTS**

The authors thank Harjeet Kaur Malhi, Astrid Börjesson, Malin Hjertqvist and Camilla Halzius, the staff at the delivery ward at Karolinska University Hospital Huddinge and all mothers and infants who participated in the study. This study was supported by grants from The Swedish Childhood Cancer Foundation, The regional agreement on medical training and clinical research (ALF) in Stockholm and Gothenburg and The Dr Åke Olsson Foundation for Hematological Research, Stockholm.

For peer review only

**TABLE 1.** Baseline characteristics of mothers and infants according to time for umbilical cord clamping

|                                            | Umbilical cord clamping time |              |                    | P       |
|--------------------------------------------|------------------------------|--------------|--------------------|---------|
|                                            | 10s<br>n=166 (HC)            | 60s<br>n=191 | 180s<br>n=168 (HC) |         |
| <b>Maternal characteristics</b>            |                              |              |                    |         |
| Age (years)                                | 31.7(4.2)                    | 30.7(4.7)    | 30.8(4.9)          | NS      |
| Parity (including study child)             | 1.81(0.87)                   | 1.86(0.76)   | 1.76(0.74)         | NS      |
| Weight at first antenatal visit (kg)       | 66.4(12.0)                   | 67.3(11.5)   | 67.3(12.1)         | NS      |
| Body mass index                            | 23.6(3.8)                    | 24.5(3.9)    | 23.9(3.6)          | NS      |
| Haemoglobin at first antenatal visit (g/L) | 128(9)                       | 128(10)      | 128(11)            | NS      |
| No (%) of vaginal deliveries:              |                              |              |                    |         |
| Non-instrumental                           | 157(95)                      | 184(96)      | 157(94)            | NS      |
| Vacuum extraction                          | 8(5)                         | 7(4)         | 11(7)              | NS      |
| Forceps                                    | 1(0.6)                       | 0(0)         | 0(0)               | NS      |
| <b>Infant characteristics</b>              |                              |              |                    |         |
| Gestational age (weeks)                    | 40.0(1.1)                    | 40.0(1.0)    | 40.0(1.1)          | NS      |
| No (%) of males                            | 83(50)                       | 98(51)       | 73(43)             | NS      |
| Birth weight (g)                           | 3523(483)                    | 3603(454)    | 3633(464)          | NS      |
| Birth length (cm)                          | 50.7(1.9)                    | 50.6(1.8)    | 50.9(1.9)          | NS      |
| Head circumference (cm)                    | 34.7(1.3)                    | 35.1(1.3)    | 35.0(1.4)          | NS      |
| Umbilical cord haemoglobin (g/L)           | 163(15)                      | 153(20)      | 158(18)            | <0.001* |
| Umbilical cord haematocrit (%)             | 48.7(4.3)                    | 47.0(5.5)    | 47.1(5.0)          | 0.005** |

Values are means (SD) unless stated otherwise. P<0.05 was considered significant.

NS=non-significant; HC= Historical cohort.

\*Comparison of 10s and 60s. For 180s and 60s, P=0.063.

\*\*Comparison of 10s and 60s. For 180s and 60s, P>0.99.

**TABLE 2.** Outcome measures at the age of four months in infants whose umbilical cord were clamped after 10s, 60s or 180s

|                                           | Umbilical cord clamping time |                |                    | 60s vs 10s                  |        | 60s vs 180s                 |        |
|-------------------------------------------|------------------------------|----------------|--------------------|-----------------------------|--------|-----------------------------|--------|
|                                           | 10s<br>n=153 (HC)            | 60s<br>n=147   | 180s<br>n=148 (HC) | Mean difference<br>(95% CI) | P      | Mean difference<br>(95% CI) | P      |
| Infant age (days)                         | 122 (6)                      | 126 (7)        | 122 (6)            | 5 (3 to 6)                  | <0.001 | 4 (3 to 6)                  | <0.001 |
| <b>Main outcome measures</b>              |                              |                |                    |                             |        |                             |        |
| Geometric mean (range)<br>ferritin (µg/L) | 80 (33 to 191)               | 96 (44 to 208) | 117 (58 to 232)    | 0.83 (0.69 to 1.45)*        | 0.052  | 1.21 (1.03 to 1.44)*        | 0.02   |
| Haemoglobin (g/L)                         | 113 (7)                      | 115 (8)        | 113 (8)            | 2 (0 to 4)                  | 0.047  | 2 (0 to 4)                  | 0.03   |
| <b>Blood count</b>                        |                              |                |                    |                             |        |                             |        |
| Haematocrit (%)                           | 33.0 (2.0)                   | 33.3 (2.2)     | 32.7 (2.1)         | 0.3 (-0.2 to 0.8)           | 0.19   | 1 (0 to 1)                  | 0.02   |
| Mean cell volume (fL)                     | 77.9 (3.1)                   | 77.7 (3.7)     | 79.2 (3.0)         | -0.2 (-1 to 0.6)            | 0.67   | -1.5 (-2.3 to -0.7)         | <0.001 |
| Reticulocyte count (x10 <sup>9</sup> /L)  | 37 (11)                      | 36 (11)        | 40 (11)            | -1 (-4 to 1)                | 0.39   | -4 (-6 to -1)               | 0.01   |
| <b>Iron status</b>                        |                              |                |                    |                             |        |                             |        |
| Transferrin receptor (mg/L)               | 4.00 (0.80)                  | 4.07 (0.92)    | 3.71 (0.69)        | 0.07 (-0.13 to 0.26)        | 0.51   | 0.35 (0.17 to 0.54)         | <0.001 |
| Transferrin saturation (%)                | 16 (6)                       | 16 (8)         | 18 (6)             | 1 (-1 to 2)                 | 0.40   | -2 (-3 to 0)                | 0.03   |

Values are means (SD) unless stated otherwise. HC= Historical cohort.

\*Geometric mean ratio (95% CI for geometric mean).

Successful analyses in the 60s and 180s groups: haemoglobin (n=140, 144), haematocrit, mean cell volume, reticulocyte count (n=135, 144), ferritin (n=147, 148), transferrin receptor (n=147, 148), transferrin saturation (n=145, 148).



**TABLE 3.** Outcome measures at the age of four months adjusted for infant age

|                                           | Umbilical cord clamping time |                     |                     | P<br>60s vs 10s | P<br>60s vs 180s |
|-------------------------------------------|------------------------------|---------------------|---------------------|-----------------|------------------|
|                                           | Adjusted means (95% CI)      |                     |                     |                 |                  |
|                                           | 10s<br>n=152 (HC)            | 60s<br>n=147        | 180s<br>n=148 (HC)  |                 |                  |
| <b>Main outcome measures</b>              |                              |                     |                     |                 |                  |
| Geometric mean (range)<br>ferritin (µg/L) | 77 (68 to 87)                | 103 (90 to 117)     | 114 (100 to 129)    | 0.002           | 0.29             |
| Haemoglobin (g/L)                         | 113 (112 to 115)             | 114 (113 to 116)    | 113 (112 to 114)    | 0.30            | 0.17             |
| <b>Blood count</b>                        |                              |                     |                     |                 |                  |
| Haematocrit (%)                           | 33.1 (32.7 to 33.4)          | 33.1 (32.8 to 33.5) | 32.7 (32.4 to 33.1) | 0.30            | 0.12             |
| Mean cell volume (fL)                     | 77.8 (77.3 to 78.3)          | 77.9 (77.3 to 78.4) | 79.1 (78.6 to 79.6) | 0.30            | 0.003            |
| Reticulocyte count (x10 <sup>9</sup> /L)  | 36.9 (35.2 to 38.7)          | 37.0 (35.0 to 38.9) | 39.4 (37.6 to 41.2) | 0.99            | 0.07             |
| <b>Iron status</b>                        |                              |                     |                     |                 |                  |
| Transferrin receptor (mg/L)               | 4.01 (3.87 to 4.14)          | 4.05 (3.92 to 4.19) | 3.72 (3.59 to 3.85) | 0.62            | 0.001            |
| Transferrin saturation (%)                | 15.7 (14.7 to 16.7)          | 16.6 (15.5 to 17.7) | 18.1 (17 to 19.2)   | 0.25            | 0.06             |

Values are means (95% CI) adjusted for infant age (days from birth) unless stated otherwise.

HC= Historical cohort. Successful analyses for the 60s group were: ferritin (n=147), haemoglobin (n=140), haematocrit, mean cell volume, reticulocyte count (n=135), transferrin receptor, and transferrin saturation (n=145). For the 180s group; blood status (n=144).

**TABLE 4.** Infants with iron status indicators outside reference limits at the age of 4 months according to umbilical cord clamping time

|                              | Umbilical cord clamping time |              |                    | P<br>60s vs 10s | P<br>60s vs 180s |
|------------------------------|------------------------------|--------------|--------------------|-----------------|------------------|
|                              | 10s<br>n=153 (HC)            | 60s<br>n=147 | 180s<br>n=148 (HC) |                 |                  |
| Ferritin <20 µg/L            | 11 (7.2)                     | 4 (2.7)      | 0 (0)              | 0.11            | 0.06             |
| Anaemia (Hb<105 g/L)         | 20 (13.1)                    | 16 (11.4)    | 20 (13.9)          | 0.72            | 0.60             |
| Mean cell volume <73 fL      | 8 (5.2)                      | 14 (10.4)    | 3 (2.1)            | 0.12            | 0.01             |
| Transferrin saturation <10%  | 22 (14.4)                    | 15 (10.3)    | 8 (5.4)            | 0.38            | 0.13             |
| Transferrin receptor >7 mg/L | 0 (0)                        | 2 (1.4)      | 0 (0)              | 0.24            | 0.25             |
| Iron deficiency*             | 8 (5.2)                      | 7 (4.8)      | 1 (0.7)            | 1.00            | 0.04             |

Values are unadjusted numbers (%). HC= Historical cohort.

Numbers of successful analyses: mean cell volume (n=153, 135, 144), transferrin saturation (n=153, 145, 148), anaemia (n=153, 140, 144).

## REFERENCES

1. Spencer PM. Controlled cord traction in management of the third stage of labour. *BMJ (Clinical research ed)* 1962;**1**:1728-32
2. Winter C, Macfarlane A, Deneux-Tharaux C, et al. Variations in policies for management of the third stage of labour and the immediate management of postpartum haemorrhage in Europe. *BJOG : an international journal of obstetrics and gynaecology* 2007;**114**(7):845-54 doi: 10.1111/j.1471-0528.2007.01377.x[published Online First: Epub Date]].
3. Yao AC, Moinian M, Lind J. Distribution of blood between infant and placenta after birth. *Lancet* 1969;**2**(7626):871-3
4. Mercer JS, Erickson-Owens DA. Rethinking placental transfusion and cord clamping issues. *J Perinat Neonatal Nurs* 2012;**26**(3):202-17; quiz 18-9 doi: 10.1097/JPN.0b013e31825d2d9a[published Online First: Epub Date]].
5. Hutton EK, Hassan ES. Late vs early clamping of the umbilical cord in full-term neonates: systematic review and meta-analysis of controlled trials. *JAMA : the journal of the American Medical Association* 2007;**297**(11):1241-52 doi: 10.1001/jama.297.11.1241[published Online First: Epub Date]].
6. Andersson O, Hellström-Westas L, Andersson D, et al. Effect of delayed versus early umbilical cord clamping on neonatal outcomes and iron status at 4 months: a randomised controlled trial. *BMJ (Clinical research ed)* 2011;**343**:d7157 doi: 10.1136/bmj.d7157[published Online First: Epub Date]].
7. Chaparro CM, Neufeld LM, Tena Alavez G, et al. Effect of timing of umbilical cord clamping on iron status in Mexican infants: a randomised controlled trial. *Lancet* 2006;**367**(9527):1997-2004 doi: 10.1016/s0140-6736(06)68889-2[published Online First: Epub Date]].
8. McDonald S, Middleton P, Dowswell T, et al. Effect of timing of umbilical cord clamping of term infants on maternal and neonatal outcomes. *Evid Based Child Health* 2014;**9**(2):303-97 doi: 10.1002/ebch.1971[published Online First: Epub Date]].
9. Oski F. Iron deficiency in infancy and childhood. *The New England journal of medicine* 1993;**329**(3)
10. Lozoff B, Beard J, Connor J, et al. Long-lasting neural and behavioral effects of iron deficiency in infancy. *Nutrition reviews* 2006;**64**(5 Pt 2):S34-43; discussion S72-91
11. Andersson O, Lindquist B, Lindgren M, et al. Effect of Delayed Cord Clamping on Neurodevelopment at 4 Years of Age: A Randomized Clinical Trial. *JAMA pediatrics* 2015;**169**(7):631-8 doi: 10.1001/jamapediatrics.2015.0358[published Online First: Epub Date]].
12. Berglund S, Westrup B, Hägglöf B, et al. Effects of iron supplementation of LBW infants on cognition and behavior at 3 years. *Pediatrics* 2013;**131**(1):47-55 doi: 10.1542/peds.2012-0989[published Online First: Epub Date]].
13. World Health Organization. Delayed clamping of the umbilical cord to reduce infant anaemia., 2014.
14. Bone Marrow Donors Worldwide. Published 2015. Secondary Bone Marrow Donors Worldwide. Published 2015. 2015. <http://www.bmdw.org/>.
15. Brunstein C, Setubal D, J W. Expanding the role of umbilical cord blood transplantation. *Br J Haematol* 2007;**137**(1):20-35 doi: 10.1111/j.1365-2141.2007.06521.x[published Online First: Epub Date]].
16. Frandberg S, Konar J, Rydberg L, Fasth A, Holgersson J. High quality cord blood banking is feasible with delayed clamping practices. The eight-year experience and current status of the national Swedish Cord Blood Bank. *Cell and tissue banking* 2016 doi: 10.1007/s10561-016-9565-6[published Online First: Epub Date]].
17. Domellöf M, Dewey K, Lönnerdal B, et al. The diagnostic criteria for iron deficiency in infants should be re-evaluated. *The Journal of nutrition* 2002;**132**(12)

- 1  
2  
3 18. Saarinen U, Siimes M. Developmental changes in serum iron, total iron-binding capacity, and  
4 transferrin saturation in infancy. *The Journal of Pediatrics* 1977;**91**(6):875-77  
5 19. Venâncio SI, Levy RB, Saldiva SR, et al. [Effects of delayed cord clamping on hemoglobin and  
6 ferritin levels in infants at three months of age]. *Cad Saude Publica* 2008;**24**(2):323-31  
7 20. Ceriani Cernadas JM, Carroli G, Pellegrini L, et al. [The effect of early and delayed umbilical cord  
8 clamping on ferritin levels in term infants at six months of life: a randomized, controlled  
9 trial]. *Arch Argent Pediatr* 2010;**108**(3):201-8 doi: 10.1590/s0325-  
10 00752010000300005[published Online First: Epub Date]].  
11 21. Georgieff MK. Long-term brain and behavioral consequences of early iron deficiency. *Nutr Rev*  
12 2011;**69 Suppl 1**:S43-8 doi: 10.1111/j.1753-4887.2011.00432.x[published Online First: Epub  
13 Date]].  
14 22. Domellöf M, Lönnerdal B, Dewey K, et al. Sex differences in iron status during infancy. *Pediatrics*  
15 2002;**110**(3):545-52  
16  
17  
18  
19

## 20 FIGURE LEGENDS

21  
22  
23  
24 **FIGURE 1.** Flow chart of the study populations.

25  
26 **FIGURE 2.** Differences in infants' iron status at the age of 4 months according to sex in three groups  
27 divided according to umbilical cord clamping time. **A:** Geometric mean ferritin according to sex and  
28 time for umbilical cord clamping, **B:** Proportion of children with iron deficiency according to time for  
29 umbilical cord clamping and sex.  
30  
31  
32  
33  
34  
35  
36  
37  
38  
39  
40  
41  
42  
43  
44  
45  
46  
47  
48  
49  
50  
51  
52  
53  
54  
55  
56  
57  
58  
59  
60

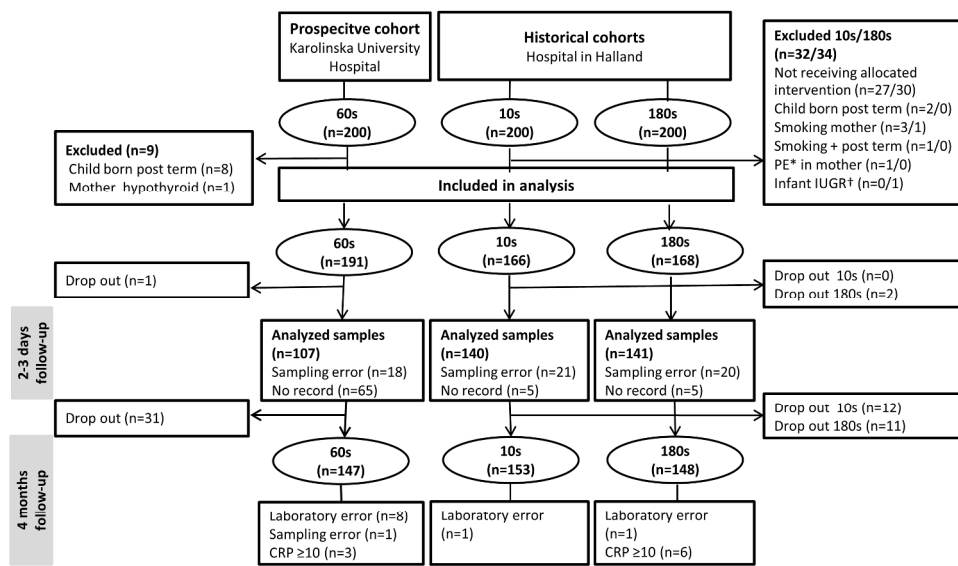

\*Pre-eclampsia  
 †Intrauterine growth retardation

FIGURE 1. Flow chart of the study populations.

254x190mm (300 x 300 DPI)



FIGURE 2. Differences in infants' iron status at the age of 4 months according to sex in three groups divided according to umbilical cord clamping time. A: Geometric mean ferritin according to sex and time for umbilical cord clamping, B: Proportion of children with iron deficiency according to time for umbilical cord clamping and sex.

254x190mm (300 x 300 DPI)

STROBE 2007 (v4) Statement—Checklist of items that should be included in reports of *cohort studies*

| Section/Topic                | Item # | Recommendation                                                                                                                                                                       | Reported on page # |
|------------------------------|--------|--------------------------------------------------------------------------------------------------------------------------------------------------------------------------------------|--------------------|
| Title and abstract           | 1      | (a) Indicate the study's design with a commonly used term in the title or the abstract                                                                                               | 1, 2               |
|                              |        | (b) Provide in the abstract an informative and balanced summary of what was done and what was found                                                                                  | 2                  |
| <b>Introduction</b>          |        |                                                                                                                                                                                      |                    |
| Background/rationale         | 2      | Explain the scientific background and rationale for the investigation being reported                                                                                                 | 3                  |
| Objectives                   | 3      | State specific objectives, including any prespecified hypotheses                                                                                                                     | 3                  |
| <b>Methods</b>               |        |                                                                                                                                                                                      |                    |
| Study design                 | 4      | Present key elements of study design early in the paper                                                                                                                              | 4                  |
| Setting                      | 5      | Describe the setting, locations, and relevant dates, including periods of recruitment, exposure, follow-up, and data collection                                                      | 4                  |
| Participants                 | 6      | (a) Give the eligibility criteria, and the sources and methods of selection of participants. Describe methods of follow-up                                                           | 4, 5               |
|                              |        | (b) For matched studies, give matching criteria and number of exposed and unexposed                                                                                                  | Not applicable     |
| Variables                    | 7      | Clearly define all outcomes, exposures, predictors, potential confounders, and effect modifiers. Give diagnostic criteria, if applicable                                             | 4, 5               |
| Data sources/<br>measurement | 8*     | For each variable of interest, give sources of data and details of methods of assessment (measurement). Describe comparability of assessment methods if there is more than one group | 5, 6               |
| Bias                         | 9      | Describe any efforts to address potential sources of bias                                                                                                                            | 6, 10              |
| Study size                   | 10     | Explain how the study size was arrived at                                                                                                                                            | 4, 5               |
| Quantitative variables       | 11     | Explain how quantitative variables were handled in the analyses. If applicable, describe which groupings were chosen and why                                                         |                    |
| Statistical methods          | 12     | (a) Describe all statistical methods, including those used to control for confounding                                                                                                | 6                  |
|                              |        | (b) Describe any methods used to examine subgroups and interactions                                                                                                                  | Not applicable     |
|                              |        | (c) Explain how missing data were addressed                                                                                                                                          | 6, 7               |
|                              |        | (d) If applicable, explain how loss to follow-up was addressed                                                                                                                       | 6, 7               |
|                              |        | (e) Describe any sensitivity analyses                                                                                                                                                | Not applicable     |
| <b>Results</b>               |        |                                                                                                                                                                                      |                    |

|                          |     |                                                                                                                                                                                                              |                |
|--------------------------|-----|--------------------------------------------------------------------------------------------------------------------------------------------------------------------------------------------------------------|----------------|
| Participants             | 13* | (a) Report numbers of individuals at each stage of study—eg numbers potentially eligible, examined for eligibility, confirmed eligible, included in the study, completing follow-up, and analysed            | Fig 1, 6, 7    |
|                          |     | (b) Give reasons for non-participation at each stage                                                                                                                                                         | Fig 1          |
|                          |     | (c) Consider use of a flow diagram                                                                                                                                                                           | Fig 1          |
| Descriptive data         | 14* | (a) Give characteristics of study participants (eg demographic, clinical, social) and information on exposures and potential confounders                                                                     | 4, 5           |
|                          |     | (b) Indicate number of participants with missing data for each variable of interest                                                                                                                          | Tables 1-4     |
|                          |     | (c) Summarise follow-up time (eg, average and total amount)                                                                                                                                                  | 7              |
| Outcome data             | 15* | Report numbers of outcome events or summary measures over time                                                                                                                                               | Not applicable |
| Main results             | 16  | (a) Give unadjusted estimates and, if applicable, confounder-adjusted estimates and their precision (eg, 95% confidence interval). Make clear which confounders were adjusted for and why they were included | 7              |
|                          |     | (b) Report category boundaries when continuous variables were categorized                                                                                                                                    | Not applicable |
|                          |     | (c) If relevant, consider translating estimates of relative risk into absolute risk for a meaningful time period                                                                                             | Not applicable |
| Other analyses           | 17  | Report other analyses done—eg analyses of subgroups and interactions, and sensitivity analyses                                                                                                               | Fig 2          |
| <b>Discussion</b>        |     |                                                                                                                                                                                                              |                |
| Key results              | 18  | Summarise key results with reference to study objectives                                                                                                                                                     | 9              |
| <b>Limitations</b>       |     |                                                                                                                                                                                                              |                |
| Interpretation           | 20  | Give a cautious overall interpretation of results considering objectives, limitations, multiplicity of analyses, results from similar studies, and other relevant evidence                                   | 9, 11          |
| Generalisability         | 21  | Discuss the generalisability (external validity) of the study results                                                                                                                                        | 9, 10          |
| <b>Other information</b> |     |                                                                                                                                                                                                              |                |
| Funding                  | 22  | Give the source of funding and the role of the funders for the present study and, if applicable, for the original study on which the present article is based                                                | 1              |

\*Give information separately for cases and controls in case-control studies and, if applicable, for exposed and unexposed groups in cohort and cross-sectional studies.

**Note:** An Explanation and Elaboration article discusses each checklist item and gives methodological background and published examples of transparent reporting. The STROBE checklist is best used in conjunction with this article (freely available on the Web sites of PLoS Medicine at <http://www.plosmedicine.org/>, Annals of Internal Medicine at <http://www.annals.org/>, and Epidemiology at <http://www.epidem.com/>). Information on the STROBE Initiative is available at [www.strobe-statement.org](http://www.strobe-statement.org).
